1 Natural and laboratory mutations in *kuzbanian* are associated with heavy metal stress phenotypes  
2 in *Drosophila melanogaster*

3

4 Hung Le Manh<sup>1,2</sup>, Lain Guio<sup>1</sup>, Miriam Merenciano<sup>1</sup>, Quirze Rovira<sup>1</sup>, Maite G. Barrón<sup>1</sup> and  
5 Josefa González<sup>1\*</sup>

6

7 <sup>1</sup>Institute of Evolutionary Biology (CSIC-Universitat Pompeu Fabra), Passeig Marítim de la  
8 Barceloneta 37-49. 08003 Barcelona. Spain

9 <sup>2</sup>Vietnam Academy of Science and Technology (VAST), 18 Hoang Quoc Viet st, Hanoi,  
10 Vietnam

11

12

13 Keywords: environmental adaptation, zinc stress tolerance, transposable elements, F-element,  
14 dominance effects, stress response elements

15

16

17

18

19 \*Corresponding author:

20 Josefa González

21 Institute of Evolutionary Biology (CSIC-Universitat Pompeu Fabra)

22 Passeig Marítim de la Barceloneta 37-49. 08003 Barcelona. Spain.

23 josefa.gonzalez@ibe.upf-csic.es

24

25 ABSTRACT

26 Organisms must cope with altered environmental conditions such as high concentrations of  
27 heavy metals. Stress response to heavy metals is mediated by the metal-responsive transcription  
28 factor 1 (MTF-1), which is conserved from *Drosophila* to humans. MTF-1 binds to metal  
29 response elements (MREs) and changes the expression of target genes. *kuzbanian* (*kuz*), a  
30 metalloendopeptidase that activates the evolutionary conserved *Notch* signaling pathway, has  
31 been identified as an MTF-1 target gene. We have previously identified a putatively adaptive  
32 transposable element in the *Drosophila melanogaster* genome, named *FBti0019170*, inserted in a  
33 *kuz* intron. In this work, we investigated whether laboratory-induced mutations in *kuz* are  
34 associated with zinc stress phenotypes. We found that both embryos and adult flies  
35 overexpressing *kuz* are more tolerant to zinc compared with wild-type flies. On the other hand,  
36 we found that the effect of *FBti0019170* on zinc stress tolerance depends on developmental stage  
37 and genetic background. Moreover, in the majority of the genetic backgrounds analyzed,  
38 *FBti0019170* has a deleterious effect in unpolluted environments in pre-adult stages. These  
39 results highlight the complexity of natural mutations and suggest that besides laboratory-induced  
40 mutations natural mutations need to be studied in order to accurately characterize gene function  
41 and evolution.

42

43

## 44 INTRODUCTION

45 Heavy metals are non-degradable substances that are natural constituents of the Earth crust<sup>1</sup>.  
46 Some heavy metals, such as iron, copper, and zinc, are required at structural and catalytic sites in  
47 proteins and are thus vital for many biological processes such as transcription, respiration, and  
48 growth<sup>1,2,3</sup>. Indeed, heavy metal deficiencies are related to animal and human diseases such as  
49 neurodegenerative and cardiovascular disorders<sup>2,4,5,6</sup>. Although essential heavy metals are  
50 necessary for protein activity, when they are present at high concentrations they may bind to  
51 inappropriate sites in proteins interfering with their functions. Thus, under limiting conditions  
52 essential heavy metals have to be enriched while under excess conditions they have to be  
53 removed<sup>7</sup>.

54 Response to heavy metal stress is mediated by the metal-responsive transcription factor-1 (MTF-  
55 1). MTF-1 is conserved from insects to vertebrates and besides heavy metal stress it also  
56 mediates the response to oxidative stress and hypoxia<sup>8,9,10,11,12</sup>. MTF-1 binds to short DNA  
57 sequence motifs known as metal response elements (MREs) activating or repressing expression  
58 of target genes<sup>13</sup>. Functional MREs have been located in the promoter regions, downstream of  
59 the transcription start site, and in the introns of metal-responsive genes<sup>7,13,14, 15</sup>. In *Drosophila*,  
60 metallothioneins are the best characterized MTF-1 target genes. Metallothioneins have an  
61 extremely high affinity for heavy metal ions and play a role in both metal homeostasis and in  
62 defense against toxicity of heavy metals<sup>14</sup>.

63 Although their important role, a family knockout of all four *Drosophila* metallothioneins genes  
64 revealed that besides these proteins, other MTF-1 target genes must play a role in response to  
65 heavy metals and more specifically in zinc defense<sup>16</sup>. As expected according to these results, a  
66 genome-wide screen for MTF-1 target genes identified several candidate genes that respond to

67 the presence of heavy metals in the environment<sup>15</sup>. One of these candidate genes, *kuzbanian*  
68 (*kuz*), is a metalloendopeptidase that controls many biological processes during development and  
69 differentiation<sup>17</sup>. *kuz* belongs to the ADAM family of metalloendopeptidases that are zinc-  
70 dependent enzymes that have been shown to mediate stress response in mammals<sup>18</sup>.

71 In a previous work, we identified a putatively adaptive natural transposable element (TE),  
72 *FBti0019170*, inserted in an intron of *kuz* in *Drosophila melanogaster* natural populations<sup>19</sup> (Fig.  
73 1A). *FBti0019170* is a 4.7 kb non-LTR retrotransposon that belongs to the *F-element* family.  
74 *FBti0019170* is a strong candidate to play a role in the out-of-Africa adaptation: while most TEs  
75 are deleterious and thus present at low frequencies in populations, *FBti0019170* is present at high  
76 frequencies in North American populations and at low frequencies in African populations<sup>19</sup>.

77 Additionally, the regions flanking this insertion showed signatures of a partial selective sweep.  
78 This suggests that *FBti0019170* has increased in frequency due to positive selection<sup>19</sup>.

79 *FBti0019170* is located in the center of the sweep and we could not identify any other linked  
80 mutation further suggesting that the TE is the causal mutation. We have also already shown  
81 using allele-specific expression experiments that a *kuz* allele carrying *FBti0019170* insertion is  
82 overexpressed compared to a *kuz* allele without this insertion<sup>19</sup>.

83 In this work, we investigated whether *kuz* is involved in heavy metal stress response, as has been  
84 previously suggested<sup>15</sup>, and whether *FBti0019170* has fitness consequences for flies that carry  
85 this natural insertion. We performed heavy metal stress tolerance assays using zinc chloride.  
86 High concentrations of zinc chloride are relevant for *D. melanogaster* natural populations  
87 because of its used in pesticides and fertilizers ([www.epa.gov](http://www.epa.gov)). We performed experiments with  
88 laboratory mutant flies and with flies collected in natural populations. Furthermore, because  
89 tolerance to environmental stress might differ between developmental stages, as has been already

90 shown for lead, alcohol, and heat stress<sup>20,21,22,23,24</sup>, we tested zinc stress tolerance in adult and  
91 pre-adult stages.

92

93

## 94 **RESULTS**

### 95 ***kuz-overexpressing* flies are associated with increased zinc stress tolerance**

96 To check whether *kuz* is involved in zinc stress response, we first determined the concentration  
97 of zinc that is required to kill 50% of wild-type flies (LD<sub>50</sub>). We tested 5 mM, 10 mM, and 20  
98 mM and determined that 20 mM was the adequate dose for both male and female flies (Fig. S1A)  
99 (see Material and Methods). We then compared the survival rate of transgenic flies  
100 overexpressing *kuz*, *kuz-overexpressing* flies, with wild-type flies with a similar genetic  
101 background: *kuz-wildtype* flies (see Material and Methods). In nonstress conditions, that is, flies  
102 kept in standard fly food, we found no differences in the survival of *kuz-overexpressing* and *kuz-*  
103 *wildtype* flies (Fig. 2A). However, under zinc stress conditions, we found that *kuz-*  
104 *overexpressing* flies had higher survival than *kuz-wildtype* flies for both males and females (Fig.  
105 2A and Table 1). To confirm these results, we performed a replicate of the experiment using flies  
106 from the same two strains a few generations later. We obtained the same results: both *kuz-*  
107 *overexpressing* male and female flies had higher survival than *kuz-wildtype* flies under zinc  
108 stress conditions (Fig. 2B and Table 1).

109 Overall, we found that while there were no differences in survival between *kuz-overexpressing*  
110 and *kuz-wildtype* flies in nonstress conditions, *kuz-overexpressing* flies had higher survival than  
111 *kuz-wildtype* flies under zinc stress conditions (Fig.2 and Table 1). These results suggest that *kuz*  
112 could play a role in response to zinc stress.

113

114 **Egg to adult viability is higher in *kuz-overexpressing* flies in zinc stress conditions**

115 As mentioned above, tolerance to environmental stress might differ between developmental  
116 stages. Thus, we also tested egg to adult viability under zinc stress conditions in *kuz-*  
117 *overexpressing* and *kuz-wildtype* flies. We first performed an LD<sub>50</sub> and found that 10 mM zinc is  
118 the dose at which ~50% of the wild-type embryos do not emerge (Fig. S1B) (see Material and  
119 Methods).

120 We compared the egg to adult viability of *kuz-overexpressing* flies with *kuz-wildtype* flies in  
121 nonstress and in zinc stress conditions (Fig. 3). ANOVA analysis showed that the experimental  
122 condition (nonstress or zinc stress) and the interaction between experimental condition and  
123 genotype (*kuz-overexpressing* or *kuz-wildtype*) were significant (Fig. 3 and Table 2): *kuz-*  
124 *overexpressing* flies had higher egg to adult viability than *kuz-wildtype* flies in zinc stress  
125 conditions. This suggested that *kuz* could play a role in zinc stress response also in pre-adult  
126 developmental stages.

127

128

129 ***FBti0019170* is associated with increased zinc tolerance in flies from outbred populations**

130 As mentioned above, *FBti0019170*, inserted in the third intron of *kuz*, shows signatures of a  
131 selective sweep suggesting that this natural insertion has increased in frequency due to positive  
132 selection. We thus investigate whether flies with *FBti0019170* were associated with increased  
133 tolerance to zinc stress. We analyzed both adult fly survival and egg to adult viability in  
134 nonstress and zinc stress conditions in natural strains with different genetic backgrounds: outbred

135 strains and isofemale strains. Analyzing different genetic backgrounds is needed because the  
136 effect of mutations is often background dependent<sup>25</sup>.

137 We first constructed two outbred laboratory strains: one outbred strain homozygous for the  
138 presence of *FBti0019170* and one outbred strain homozygous for the absence of this insertion  
139 (see Material and Methods). We subjected these two outbred strains to zinc stress and we found  
140 that both male and female flies with *FBti0019170* had higher survival than flies without  
141 *FBti0019170* (Fig.4A, Table 1). The same results were obtained with the same outbred strains  
142 analyzed a few generations later (Fig.4B and Table 1). In both replicas, no differences in survival  
143 between flies with and without *FBti0019170* were found in nonstress conditions (Fig. 4).  
144 Overall, we found that *FBti0019170* is associated with increased zinc tolerance in adult flies.

145

146 ***FBti0019170* is associated with decreased egg to adult viability both in nonstress and in zinc**  
147 **stress conditions in outbred populations**

148 We also tested whether embryos from the outbred strain with *FBti0019170* insertion were more  
149 tolerant to zinc stress compared with embryos from the outbred strain without the insertion. We  
150 performed two replicas of the experiment (Fig. 5). ANOVA analysis showed that the  
151 experimental condition (nonstress vs zinc stress) and the insertion genotype (presence vs absence  
152 of *FBti0019170*) were significant (Table 2). Both in nonstress and zinc stress conditions, flies  
153 with *FBti0019170* had a lower survival rate compared to flies without the insertion (Fig. 5).  
154 Thus, while *FBti0019170* is associated with higher adult survival in zinc stress conditions, it is  
155 also associated with lower egg to adult viability both in nonstress and in zinc stress conditions.

156

157 ***FBti0019170* effect in adult survival in isofemale strains depends on the genetic**

158 **background**

159 We also performed adult survival experiments in nonstress and zinc stress conditions with  
160 different isofemale strains. Adult survival of *IV22*, *IV145*, and *B45* isofemale strains containing  
161 *FBti0019170* insertion was compared with the adult survival of *B47* isofemale strain without this  
162 insertion (see Material and Methods). No differences in survival between flies with and without  
163 *FBti0019170* insertion were observed in nonstress conditions. However, we found that *IV22* flies  
164 with *FBti0019170* had lower survival than *B47* flies without *FBti0019170* (Fig. 6A Table 1). We  
165 confirmed these results by performing a second replica a few generations later (Fig. 6B; Table  
166 1). Similarly, *IV145* flies with *FBti0019170* also had lower survival than *B47* flies without  
167 *FBti0019170* (Fig. 6C Table 1). On the other hand, male flies of *B45* strain had higher survival  
168 than male flies of *B47* strain (Fig. 6D; Table 1) while *B45* female flies had higher survival than  
169 *B47* female flies at early time points while they had lower survival at later time points (Fig. 6D;  
170 Table 1).

171 Therefore, in isofemale strains, the association between *FBti0019170* and heavy metal stress  
172 phenotypes depends on the background: while *IV22* and *IV145* isofemale strains with the  
173 insertion were more sensitive to zinc stress, *B45* were more tolerant to zinc stress in early time  
174 points compared to flies without this insertion.

175

176 ***FBti0019170* effect in egg to adult viability in isofemale strains also depends on the genetic**

177 **background**

178 We also checked egg to adult viability in the isofemale strain *IV22* that contains *FBti0019170*  
179 insertion and in *B47* strain without this insertion. Additionally, we identified two strains



180 heterozygous for *FBti0019170*, *B38* and *IV52*, and we generated homozygous flies for the  
181 presence and homozygous flies for the absence of *FBti0019170* by brother-sister crosses (see  
182 Material and Methods). Note that flies with and without the insertion generated from  
183 heterozygous strains, have more similar genetic backgrounds compared with isofemale strains  
184 with and without the insertion.

185 For *IV22* and *B47*, we found that the experimental condition, the insertion genotype and the  
186 interaction between these two factors were significant (Figure 7A and Table 2). *IV22* flies that  
187 contain *FBti0019170* insertion had lower viability in nonstress conditions and higher viability in  
188 zinc stress conditions than flies without *FBti0019170*. For the *B38* flies with and without  
189 *FBti0019170* insertion, we found that the experimental condition, and the interaction between  
190 experimental condition and insertion genotype were significant (Fig. 7B; Table 2): in nonstress  
191 conditions flies with *FBti0019170* had lower viability while in zinc stress conditions had higher  
192 viability than flies without this insertion. Finally, for *IV52* strains with and without *FBti0019170*,  
193 only the experimental condition was significant (Fig. 7C; Table 2).

194 Overall, we found that the effect of *FBti0019170* on egg to adult viability depends on the genetic  
195 background: in two of the three backgrounds analyzed the presence/absence of *FBti0019170*  
196 and/or the interaction between the genotype and the experimental condition was significant (Fig.  
197 7).

198

### 199 ***FBti0019170* could add a metal-responsive element to the intron of *kuzbanian***

200 As mentioned above, *kuz* was found to be a MTF-1 target gene, and we have shown that *kuz-*  
201 *overexpressing* flies were more zinc tolerant compared to *kuz-wildtype* flies. We have also found  
202 that flies with *FBti0019170* were associated with increased zinc tolerance in some genetic

203 backgrounds. To shed light on the mechanisms underlying zinc stress response of laboratory-  
204 induced and natural *kuz* mutations, we investigated whether *kuz* has metal responsive elements  
205 (MREs) in its promoter region and whether *FBti0019170* is introducing any additional MRE. We  
206 could not detect any MRE in the *kuz* promoter. On the other hand, we found a high score MRE  
207 nearby the 3' end of *FBti0019170* (Fig. 1C and supplementary Table S2). This prompted us to  
208 investigate whether there were other MREs in the *kuz* intron where *FBti0019170* is inserted, and  
209 we identified three additional MREs (Fig. 1C). Interestingly, two of these MREs are located only  
210 462 bp downstream of the MRE introduced by *FBti0019170* while the third intronic MRE is  
211 located nearby the 3' end of the intron (Fig. 1C and Table S2).  
212 Overall, we found four MREs present in the *kuz* intron where *FBti0019170* is inserted.  
213 *FBti0019170* adds one of these four MREs. Because there is a correlation between the number of  
214 transcription factor binding sites and the increase in the level of expression of nearby genes<sup>26</sup>,  
215 these results suggest that *FBti0019170* could affect the expression of *kuz* and thus could play a  
216 role in zinc stress response.

217

218

219 **Flies homozygous for the presence and for the absence of *FBti0019170* insertion do not**  
220 **show differences in the level of *kuz* expression**

221 We checked whether outbred flies homozygous for the presence of *FBti0019170* showed  
222 different levels of *kuz* expression compared to outbred flies without this insertion. We performed  
223 qRT-PCR experiments both in nonstress and in zinc stress conditions for both male and female  
224 flies. No differences in the level of expression of *kuz* between flies with and without  
225 *FBti0019170* were found in nonstress or zinc stress conditions for males or for females (Fig. 8).

226

227

## 228 **DISCUSSION**

229 In this work, we showed that a laboratory-induced mutation in *kuz* is associated with tolerance to

230 zinc stress both in adult (Fig. 2) and embryo stages (Fig. 3). These results are consistent with a

231 role of *kuz* in heavy metal stress response, as it has been previously suggested by experiments

232 performed with MTF-1 mutant flies that identified *kuz* as a candidate heavy metal-responsive

233 gene<sup>15</sup>. *kuz*, a metalloprotease that belongs to the ADAM family, is a component of the Notch

234 signaling pathway that plays a role in axon guidance in the developing central nervous

235 system<sup>17,27-30</sup>. ADAM metalloproteases in mammals, and more specifically *kuz* ortholog

236 ADAM10, ADAM17, and to a lesser extent ADAM9, also regulate epidermal growth factor

237 receptor (EGFR) activation in response to a variety of stress agents<sup>18</sup>. Stress-induced EGFR

238 activation leads to the activation of mitogen-activated protein kinase (MAPKs) signaling that

239 trigger transcriptional regulation of a variety of stress-response genes<sup>1</sup>. Thus, both *kuz* and its

240 ortholog gene ADAM10 could be involved in response to stress. Indeed, the organomercurial

241 compound p-aminophenylmercuric acetate (APMA) have been reported to upregulate both *kuz*

242 and *ADAM10* protease activity<sup>31,32</sup> and methylmercury has been suggested to activate ADAM

243 proteases in *Drosophila*<sup>33</sup>.

244

245 Our previous results showing that *FBti0019170*, which is inserted in the third intron of *kuz*, has

246 most probably increased in frequency due to positive selection, prompted us to investigate

247 whether flies with this insertion have increased zinc tolerance. To test this hypothesis, we

248 generated an outbred population and analyzed five isofemale strains established from two

249 different natural populations. We found that the effect of *FBti0019170* on egg to adult viability  
250 and on adult survival under zinc stress conditions depended on the genetic background analyzed  
251 (Figure 4-7). In four of the six backgrounds analyzed, the presence of *FBti0019170* insertion was  
252 associated with higher adult survival or increased egg to adult viability under zinc stress  
253 conditions. In the other two backgrounds, *FBti0019170* was not significantly associated with  
254 zinc stress phenotypes or *FBti0019170* was associated with increased sensitivity to zinc stress  
255 (Fig. 4-7). These results are consistent with previous experimental data showing that the  
256 mutational effects in one genetic background are often enhanced or suppressed in other  
257 backgrounds<sup>34,35</sup>. For example, different mutations in the same gene have been associated with  
258 both increased and decreased life span in *D. melanogaster*<sup>36</sup>. Different effects of a mutation, as  
259 the ones described in this work, are most likely explained by epistatic interactions in the different  
260 genetic backgrounds<sup>25</sup>.

261  
262 Our results also showed that *FBti0019170* was associated with lower egg to adult viability in  
263 nonstress conditions in three of the four backgrounds analyzed (Fig. 5 and 7). Between-  
264 environments trade-offs have been reported for cadmium resistance in *D. melanogaster*<sup>37</sup> as well  
265 as for other environmental stress conditions such as oxidative stress<sup>38</sup>. Two mechanisms have  
266 been proposed to explain the fitness costs of heavy-metal resistance in unpolluted environments:  
267 the activation of detoxification enzymes might use resources that are then unavailable for other  
268 fitness traits, and/or resistant flies might be less efficient at metal uptake or utilization, which  
269 would lead to micronutrient deficiencies<sup>37</sup>. In the case of *FBti0019170*, the deleterious effect of  
270 the mutation was found in egg to adult viability while no cost of selection was found in adult  
271 stages. As mentioned above, *kuz* plays a role in development and differentiation<sup>17,27-30</sup>. Thus, it

272 could be that the cost of selection of *FBti0019170* is related to the role of *kuz* during  
273 development.

274

275 Consistent with the activation of *kuz* by zinc, we found *in silico* evidence for three MREs located  
276 in the *kuz* intron where the candidate adaptive TE *FBti0019170* is inserted (Fig. 1C). Indeed,  
277 *FBti0019170* insertion adds another MRE 462 bp upstream of the three intronic MREs (Fig. 1C).  
278 We thus check the expression of *kuz* in flies homozygous for the presence and for the absence of  
279 *FBti0019170* using qRT-PCR. We did not find differences in *kuz* expression in nonstress or in  
280 zinc stress conditions (Fig. 7). However, we have previously shown, using allele-specific  
281 expression, that an allele carrying *FBti0019170* insertion is overexpressed compared to an allele  
282 that does not carry this insertion<sup>19</sup>. Because allele-specific expression is performed in F<sub>1</sub> hybrids  
283 in which the two alleles share the same cellular environment, the expression differences between  
284 the two alleles must be due to cis-regulatory differences<sup>39</sup>. *FBti0019170* is thus a strong  
285 candidate to be responsible for the observed differences in *kuz* expression level<sup>19</sup>. The lack of  
286 differential expression in homozygous flies could be partly explained by the higher sensitivity of  
287 allele-specific expression experiments compared to qRT-PCR<sup>40</sup>. Besides, it could be that  
288 *FBti0019170* effect on *kuz* expression is overdominant as has been described for a few genes  
289 involved in temperature stress response<sup>41</sup>. Further experiments are needed in order to understand  
290 the molecular mechanism underpinning *FBti0019170* insertion effects.

291

292 As with other quantitative traits, including starvation stress and olfactory behavior, we have  
293 found that mutations in a gene with well-characterized roles in development affect tolerance to  
294 zinc stress<sup>34</sup>. Our results showed that while *kuz* laboratory-induced mutations are consistently

295 associated with increased tolerance to heavy metal stress in embryo and adult stages, natural  
296 mutations have more complex fitness effects that depend on the developmental stage and the  
297 genetic background. Furthermore, while no cost of selection was associated with the laboratory-  
298 induced mutation, we found that *FBti0019170* is associated with decreased egg to adult viability  
299 in unpolluted environments. Different fitness effects of laboratory-induced and natural mutations  
300 have previously been described suggesting that the analysis of natural mutations is needed in  
301 order to accurately characterize gene function and evolution<sup>42,43</sup>.

302

## 303 **METHODS**

### 304 **Genotyping flies for presence/absence of *FBti0019170*.**

305 To check the insertion genotype, that is, whether different fly stocks were homozygous for the  
306 presence, homozygous for the absence, or heterozygous for *FBti0019170* insertion, we  
307 performed PCR with two pairs of primers (<sup>19</sup>. Primer pair *Left* (L) and *Right* (R) were designed to  
308 check for the presence of *FBti0019170* (Fig.1B). The *Left* primer  
309 (TTCGGAGTGAAAACATCCAAAGA) binds to *FBti0019170* while the *Right* primer  
310 (TTGAATATTGTGTCGATTGCGTG) binds to the downstream sequence flanking the insertion  
311 (Fig.1B). This primer pair only gives a PCR band when *FBti0019170* is present. On the other  
312 hand, primer pair *Flanking* and *Right* was designed to check for the absence of *FBti0019170*.  
313 The *Flanking* (FL) primer (GACGAATTCATAAATTGGCGGTT) binds to the upstream  
314 sequence flanking the insertion (Fig.1B). This primer pair only gives a PCR band when  
315 *FBti0019170* is absent. If only the *Left-Right* primer pair gives a PCR band, the strain is  
316 homozygous for the presence of *FBti0019170*. If only the *Flanking-Right* primer pair gives a

317 PCR band, the strain is homozygous for the absence of *FBti0019170*. Finally, if both primers  
318 give PCR bands, the strain is heterozygous for *FBti0019170* insertion<sup>44</sup>.  
319 48 different isofemale strains collected in Stockholm (Sweden, “B” strains) and 15 isofemale  
320 strains collected in Bari (Italy, “IV” strains), available in our laboratory, have been tested by  
321 PCR to check for the presence/absence of *FBti0019170* natural insertion (Table S1).

322

### 323 **Fly strains**

324 **Laboratory mutant strains.** We used transgenic flies that carry a full copy of *kuz* coding region  
325 under the control of a *UAS* promoter<sup>45</sup> (Bloomington stock # 5816). To activate the expression of  
326 *kuz*, we crossed the flies with transgenic flies that carry the *GAL4* gene under the control of  
327 *Act5C* promoter (Bloomington stock # 4414) and we kept the crosses at 25°C. A total of 200  
328 virgin female of *kuz* mutant flies were crossed with 200 male of *Act5C-GAL4* flies. F<sub>1</sub> flies  
329 carrying *UAS-kuz* and *Act5C-GAL4*, and thus overexpressing *kuz*, have wild-type wings (*kuz*-  
330 *overexpressing* flies) while F<sub>1</sub> flies that do not have the *Act5C-GAL4* chromosome and thus do  
331 not over-express *kuz* have *Curly* wings. A stock with a w[\*] genetic background, as the *kuz*  
332 transgenic flies background, was used as the baseline for the experiment (*kuz-wildtype* flies;  
333 Bloomington stock # 7087).

334 **Outbred populations.** To create an outbred population with *FBti0019170* insertion and an  
335 outbred population without the insertion, a total of 10 isofemale strains were selected: five  
336 strains homozygous for the presence of the element (*B7*, *B45*, *IV33*, *IV49*, *IV50*) and five strains  
337 homozygous for the absence (*B2*, *B4*, *B8*, *B15*, *B18*) (Table S1). We collected 10 virgin females  
338 and 10 males from each one of these strains. We did two crosses by mixing males and females  
339 with the TE to create an outbred *FBti0019170* (+) strain, and males and females without the TE

340 to create an outbred *FBti0019170* (-) strain. We kept the two populations for at least seven  
341 generations before performing any phenotypic experiments.

342 **Isofemale Strains.** We selected three strains in which *FBti0019170* was present (*IV22*, *IV145*  
343 and *B45*) and one strain in which *FBti0019170* was absent (*B47*) to perform phenotypic  
344 experiments (Table S1). Isofemale flies heterozygous for *FBti0019170* insertion were also  
345 selected to create homozygous flies for the presence and homozygous flies for the absence of  
346 *FBti0019170* (see below).

347 **Heterozygous strains.** We first identified two isofemale strains (*B38* and *IV52*) that were  
348 heterozygous for *FBti0019170* insertion. We then collected 10 to 25 virgin females from each  
349 strain and crossed them individually with males from the same strain. F<sub>1</sub> progeny of all the  
350 crosses were checked for the presence/absence of the *FBti0019170* insertion by PCR. Brother-  
351 sister crosses were performed until we obtained flies that were homozygous for the presence of  
352 *FBti0019170* and flies that were homozygous for the absence of *FBti0019170*. Those flies were  
353 amplified for several generations in order to obtain enough quantity of flies to perform the  
354 experiments.

355

### 356 **Zinc stress experiments**

357 We used zinc chloride (ZnCl<sub>2</sub>) as a heavy metal stress agent (Sigma-Aldrich catalog # Z0152).  
358 We have performed zinc stress experiments in two different life stages: adult flies and embryos.  
359 **Adult flies.** To determine the Lethal Dose<sub>50</sub> (LD<sub>50</sub>) for the adult flies experiments, we tested  
360 three different zinc concentrations: 5 mM, 10 mM and 20 mM. The experiments allowed us to  
361 identify the ZnCl<sub>2</sub> concentration at which about 50% of the adult flies die. ZnCl<sub>2</sub> was dissolved  
362 in water and added to the fly food to the desired final concentration. Standard fly food was used



363 for the nonstress conditions. We used the outbred population without *FBti0019170* to establish  
364 the LD<sub>50</sub>. We analyzed 10 vials for each concentration and sex with 20 five to seven day-old flies  
365 each.

366 For the zinc stress tolerance experiments with adult flies from natural populations, a total of 100  
367 vials with 20 flies each were used including 40 vials for nonstress conditions (10 vials per sex  
368 and per strain) and 60 vials for zinc stress condition (15 vials per sex and per strain). We used  
369 five to seven day-old flies.

370 For the zinc stress experiments performed with *kuz-overexpressing* flies, we used 40 vials for the  
371 nonstress condition and 60 vials for the zinc stress condition. 10 vials per condition were used to  
372 perform the experiments for the *kuz-wildtype* flies. We used five to seven day-old flies.

373

374 **Embryos.** We determined the LD<sub>50</sub> using embryos from an isofemale strain without  
375 *FBti0019170* insertion (*B47*). These experiments allowed us to identify the ZnCl<sub>2</sub> concentration  
376 at which about 50% of the embryos do not emerge. We first tested three different ZnCl<sub>2</sub>  
377 concentrations: 1.25 mM, 2.5 mM and 5 mM. The same strain and protocol but different  
378 concentrations of ZnCl<sub>2</sub> were tested in a second LD<sub>50</sub> experiment: 5 mM, 10mM, 20 mM. In both  
379 cases, standard fly food was used for the nonstress conditions. Five day-old isofemale flies  
380 without *FBti0019170* insertion were kept in chambers with agar and apple juice plates to lay  
381 eggs during 4 hours. 10 vials with 50 embryos each were analyzed for each of the three ZnCl<sub>2</sub>  
382 concentrations and for the nonstress condition.

383

384 Once the LD<sub>50</sub> was determined, we performed zinc stress experiments using 50 embryos per vial.  
385 For the *kuz-wildtype* strain, we analyzed 10 vials for nonstress and 10 vials for zinc stress

386 conditions. For the *Kuz-overexpressing* strains, we analyzed 20 vials for nonstress and 20 vials  
387 for zinc stress conditions. For natural strains, we used 15 vials for the zinc stress condition and  
388 10 vials for the nonstress condition.

389

### 390 ***In silico* prediction of MTF-1 binding sites**

391 We use TFBSTools software<sup>46</sup> to predict binding sites of MTF-1 in the *kuz* promoter region and  
392 in the *kuz* intron where *FBti0019170* is inserted. Position weight matrices for MTF-1  
393 transcription factor were obtained from JASPAR database<sup>47</sup>. The PB0044.1 and PB00148.1  
394 matrices were used. Although the default score threshold in TFBSTools is 0.75, we were  
395 conservative and we only considered significant those hits with a score threshold  $\geq 0.95$ . We  
396 used the release 6.02 of the *D. melanogaster* genome available at <http://flybase.org>.

397

### 398 **qRT-PCR Expression analysis**

399 We quantified the expression of *kuz* in nonstress and stress conditions induced by zinc. Five day-  
400 old outbred flies (30 females and 50 males) were separated by sex and transferred to standard fly  
401 food as well as food containing 20 mM zinc for 48 hours before freezing them in liquid nitrogen.

402 We did three biological replicas with flies from three different generations for each sex and  
403 condition. We purified total RNA using Trizol reagent and we synthesized cDNA using 1  $\mu$ g of  
404 RNA after treatment with DNase. We then used the cDNA for quantitative PCR analysis using

405 *Act5C* as a housekeeping gene. The primers used were as follows: *kuz\_left primer*:

406 CACCGAGCATCGCAACATAC, *kuz\_right primer*: GAATTGCGACAGGCCGAATC,

407 *Act5C\_left primer*: ATGTCACGGACGATTTCACG, and *Act5C\_right primer*:

408 GCGCCCTTACTCTTTCACCA.

409 Results were analyzed using the dCT method and following the recommendations of the MIQE  
410 guideline<sup>48</sup>.

411

## 412 **Statistical analysis**

413 **Log-rank test.** The number of surviving flies for both nonstress and stress conditions were  
414 counted every 24 hours for five consecutive days. We used Kaplan-Meier to estimate the  
415 survival functions and performed a log-rank test to compare the functions between flies with and  
416 without the insertion using the SPSS software.

417 The odds-ratio (O.R.) was calculated as: (number of tolerant flies alive/number of tolerant flies  
418 dead)/ (number of sensitive flies alive/number of sensitive flies dead). The upper and lower 95%  
419 O.R. confidence interval was calculated as:  $e^{[\ln OR \pm 1.96 \sqrt{(1/\text{number of tolerant flies alive} + 1/\text{number of tolerant flies dead} + 1/\text{number of sensitive flies alive} + 1/\text{number of sensitive flies dead})]}$ . We used the 95% confidence interval as a proxy for the presence of statistical  
422 significance when it does not overlap the null value, that is, O.R. = 1.

423

424 **Two-way ANOVA analyses.** The number of flies emerging from the experiments performed  
425 with embryos was transformed to a uniform distribution using the rank transformation. SPSS v21  
426 was used to perform the ANOVA analyses. Two different variables were considered for the  
427 ANOVA analyses: the genotype (*kuz-overexpressing*/*kuz-wildtype* or *FBti0019170* present/  
428 *FBti0019170* absent), and the experimental condition (nonstress and zinc stress). The replicate  
429 effect was also considered. As a measure of the effect size, we estimated partial eta-squared  
430 values (0.01 small effect, 0.06 medium effect, and 0.14 large effect).

431

432

433 **REFERENCES**

434

- 435 1 Straalen, N. M. v., Roelofs, D. An introduction to ecological genomics. 363 p (Oxford  
436 University Press,, Oxford, 2012).
- 437 2 Lichtlen, P. & Schaffner, W. Putting its fingers on stressful situations: the heavy metal-  
438 regulatory transcription factor MTF-1. *Bioessays* **23**, 1010-1017 (2001).
- 439 3 Janssens, T. K. S., Roelofs, D. and Van Straalen, N. M. Molecular mechanisms of heavy  
440 metal tolerance and evolution in invertebrates. *Insect Science* **16**, 3-18 (2009).
- 441 4 Nielsen, F. H. History of zinc in agriculture. *Adv Nutr* **3**, 783-789 (2012).
- 442 5 Kaur, K., Gupta, R., Saraf, S. A. and Saraf, S. K. Zinc: The Metal of Life.  
443 *Comprehensive Reviews in Food Science and Food Safety* **13**, 358-376 (2014).
- 444 6 Tyszka-Czochara, M. *et al.* The role of zinc in the pathogenesis and treatment of central  
445 nervous system (CNS) diseases. Implications of zinc homeostasis for proper CNS  
446 function. *Acta Pol Pharm* **71**, 369-377 (2014).
- 447 7 Gunther, V., Lindert, U. & Schaffner, W. The taste of heavy metals: gene regulation by  
448 MTF-1. *Biochim Biophys Acta* **1823**, 1416-1425 (2012).
- 449 8 Zhang, B., Egli, D., Georgiev, O. & Schaffner, W. The Drosophila homolog of  
450 mammalian zinc finger factor MTF-1 activates transcription in response to heavy metals.  
451 *Mol Cell Biol* **21**, 4505-4514 (2001).
- 452 9 Westin, G. & Schaffner, W. A zinc-responsive factor interacts with a metal-regulated  
453 enhancer element (MRE) of the mouse metallothionein-I gene. *EMBO J* **7**, 3763-3770  
454 (1988).

- 455 10 Brugnera, E. *et al.* Cloning, chromosomal mapping and characterization of the human  
456 metal-regulatory transcription factor MTF-1. *Nucleic Acids Res* **22**, 3167-3173 (1994).
- 457 11 Auf der Maur, A., Belser, T., Elgar, G., Georgiev, O. & Schaffner, W. Characterization  
458 of the transcription factor MTF-1 from the Japanese pufferfish (*Fugu rubripes*) reveals  
459 evolutionary conservation of heavy metal stress response. *Biol Chem* **380**, 175-185  
460 (1999).
- 461 12 Balamurugan, K. *et al.* Metal-responsive transcription factor (MTF-1) and heavy metal  
462 stress response in *Drosophila* and mammalian cells: a functional comparison. *Biol Chem*  
463 **385**, 597-603 (2004).
- 464 13 Stuart, G. W., Searle, P. F., Chen, H. Y., Brinster, R. L. & Palmiter, R. D. A 12-base-pair  
465 DNA motif that is repeated several times in metallothionein gene promoters confers  
466 metal regulation to a heterologous gene. *Proc Natl Acad Sci U S A* **81**, 7318-7322 (1984).
- 467 14 Egli, D. *et al.* Knockout of 'metal-responsive transcription factor' MTF-1 in *Drosophila*  
468 by homologous recombination reveals its central role in heavy metal homeostasis. *EMBO*  
469 *J* **22**, 100-108 (2003).
- 470 15 Yepiskoposyan, H. *et al.* Transcriptome response to heavy metal stress in *Drosophila*  
471 reveals a new zinc transporter that confers resistance to zinc. *Nucleic Acids Res* **34**, 4866-  
472 4877 (2006).
- 473 16 Egli, D. *et al.* A family knockout of all four *Drosophila* metallothioneins reveals a central  
474 role in copper homeostasis and detoxification. *Mol Cell Biol* **26**, 2286-2296 (2006).
- 475 17 Meyer, H. *et al.* *Drosophila* metalloproteases in development and differentiation: the role  
476 of ADAM proteins and their relatives. *Eur J Cell Biol* **90**, 770-778 (2011).

- 477 18 Fischer, O. M., Hart, S., Gschwind, A., Prenzel, N. & Ullrich, A. Oxidative and osmotic  
478 stress signaling in tumor cells is mediated by ADAM proteases and heparin-binding  
479 epidermal growth factor. *Mol Cell Biol* **24**, 5172-5183 (2004).
- 480 19 Gonzalez, J., Lenkov, K., Lipatov, M., Macpherson, J. M. & Petrov, D. A. High rate of  
481 recent transposable element-induced adaptation in *Drosophila melanogaster*. *PLoS Biol*  
482 **6**, e251:0060251 (2008).
- 483 20 Loeschcke, V. & Krebs, R. A. Selection for Heat-Shock Resistance in Larval and in  
484 Adult *Drosophila buzzatii*: Comparing Direct and Indirect Responses. *Evolution* **50**,  
485 2354-2359 (1996).
- 486 21 Gilchrist, G. W., Huey, R. B. & Partridge, L. Thermal sensitivity of *Drosophila*  
487 *melanogaster*: evolutionary responses of adults and eggs to laboratory natural selection at  
488 different temperatures. *Physiol Zool* **70**, 403-414 (1997).
- 489 22 Malherbe, Y., Kamping, A., van Delden, W. & van de Zande, L. ADH enzyme activity  
490 and Adh gene expression in *Drosophila melanogaster* lines differentially selected for  
491 increased alcohol tolerance. *J Evol Biol* **18**, 811-819 (2005).
- 492 23 Sgro, C. M. *et al.* A comprehensive assessment of geographic variation in heat tolerance  
493 and hardening capacity in populations of *Drosophila melanogaster* from eastern  
494 Australia. *J Evol Biol* **23**, 2484-2493 (2010).
- 495 24 van Heerwaarden, B., Lee, R. F., Wegener, B., Weeks, A. R. & Sgro, C. M. Complex  
496 patterns of local adaptation in heat tolerance in *Drosophila simulans* from eastern  
497 Australia. *J Evol Biol* **25**, 1765-1778 (2012).

- 498 25 Chandler, C. H., Chari, S. & Dworkin, I. Does your gene need a background check? How  
499 genetic background impacts the analysis of mutations, genes, and evolution. *Trends*  
500 *Genet* **29**, 358-366 (2013).
- 501 26 Xie, D. *et al.* Rewirable gene regulatory networks in the preimplantation embryonic  
502 development of three mammalian species. *Genome Res* **20**, 804-815 (2010).
- 503 27 Sotillos, S., Roch, F. & Campuzano, S. The metalloprotease-disintegrin Kuzbanian  
504 participates in Notch activation during growth and patterning of *Drosophila* imaginal  
505 discs. *Development* **124**, 4769-4779 (1997).
- 506 28 Lieber, T., Kidd, S. & Young, M. W. kuzbanian-mediated cleavage of *Drosophila* Notch.  
507 *Genes Dev* **16**, 209-221 (2002).
- 508 29 Coleman, H. A., Labrador, J. P., Chance, R. K. & Bashaw, G. J. The Adam family  
509 metalloprotease Kuzbanian regulates the cleavage of the roundabout receptor to control  
510 axon repulsion at the midline. *Development* **137**, 2417-2426 (2010).
- 511 30 McFarlane, S. Metalloproteases: carving out a role in axon guidance. *Neuron* **37**, 559-562  
512 (2003).
- 513 31 Bland, C. E., Kimberly, P. & Rand, M. D. Notch-induced proteolysis and nuclear  
514 localization of the Delta ligand. *J Biol Chem* **278**, 13607-13610 (2003).
- 515 32 Sanderson, M. P. *et al.* ADAM10 mediates ectodomain shedding of the betacellulin  
516 precursor activated by p-aminophenylmercuric acetate and extracellular calcium influx. *J*  
517 *Biol Chem* **280**, 1826-1837 (2005).
- 518 33 Bland, C. & Rand, M. D. Methylmercury induces activation of Notch signaling.  
519 *Neurotoxicology* **27**, 982-991 (2006).

- 520 34 Mackay, T. F. Mutations and quantitative genetic variation: lessons from *Drosophila*.  
521 *Philos Trans R Soc Lond B Biol Sci* **365**, 1229-1239 (2010).
- 522 35 Mackay, T. F. Epistasis and quantitative traits: using model organisms to study gene-gene  
523 interactions. *Nat Rev Genet* **15**, 22-33 (2014).
- 524 36 Magwire, M. M. *et al.* Quantitative and molecular genetic analyses of mutations  
525 increasing *Drosophila* life span. *PLoS Genet* **6**, e1001037 (2010).
- 526 37 Mark, D. F. S. & Sibly, R. M. Genetic Basis of a between-Environment Trade-off  
527 Involving Resistance to Cadmium in *Drosophila melanogaster*. *Evolution* **53**, 826-836  
528 (1999).
- 529 38 Guio, L., Barron, M. G. & Gonzalez, J. The transposable element *Bari-Jheh* mediates  
530 oxidative stress response in *Drosophila*. *Mol Ecol* **23**, 2020-2030 (2014).
- 531 39 Wittkopp, P. J., Haerum, B. K. & Clark, A. G. Evolutionary changes in cis and trans gene  
532 regulation. *Nature* **430**, 85-88 (2004).
- 533 40 Schaart, J. G., Mehli, L. & Schouten, H. J. Quantification of allele-specific expression of  
534 a gene encoding strawberry polygalacturonase-inhibiting protein (PGIP) using  
535 Pyrosequencing. *Plant J* **41**, 493-500 (2005).
- 536 41 Chen, J., Nolte, V. & Schlötterer, C. Temperature Stress Mediates Decanalization and  
537 Dominance of Gene Expression in *Drosophila melanogaster*. *PLoS Genet* **11**, e1004883  
538 (2015).
- 539 42 Ullastres, A., Petit, N. & Gonzalez, J. Exploring the Phenotypic Space and the  
540 Evolutionary History of a Natural Mutation in *Drosophila melanogaster*. *Mol Biol Evol*  
541 **32**, 1800-1814 (2015).



- 542 43 Landry, C. R. & Rifkin, S. A. The genotype-phenotype maps of systems biology and  
543 quantitative genetics: distinct and complementary. *Adv Exp Med Biol* **751**, 371-398  
544 (2012).
- 545 44 Gonzalez, J. & Petrov, D. A. The adaptive role of transposable elements in the  
546 *Drosophila* genome. *Gene* **448**, 124-133 (2009).
- 547 45 Fambrough, D., Pan, D., Rubin, G. M. & Goodman, C. S. The cell surface  
548 metalloprotease/disintegrin Kuzbanian is required for axonal extension in *Drosophila*.  
549 *Proc Natl Acad Sci U S A* **93**, 13233-13238 (1996).
- 550 46 TFBSTools: Software package for transcription factor binding site (TFBS) analysis. R  
551 package version 1.6.0, <http://jaspar.genereg.net/>. v. 1.6.0 (2015).
- 552 47 Mathelier, A. *et al.* JASPAR 2014: an extensively expanded and updated open-access  
553 database of transcription factor binding profiles. *Nucleic Acids Res* **42**, D142-147 (2014).
- 554 48 Bustin, S. A. *et al.* The MIQE guidelines: minimum information for publication of  
555 quantitative real-time PCR experiments. *Clin Chem* **55**, 611-622 (2009).

556

557

## 558 **ACKNOWLEDGEMENTS**

559 We thank members of the González lab for their comments on the manuscript. H.L.M. was a  
560 VAST-CSIC fellow, L.G. was a FI/DGR fellow (2012FI-B-00676) and J.G. is a Ramón y Cajal  
561 fellow (RYC-2010-07306). This work was supported by grants from the European Community's  
562 Seven Framework Programme (FP7-PEOPLE-2011-CIG-293860), from the Spanish  
563 Government (BFU2011-24397 and BFU2014-57779-P), and from the Generalitat de Catalunya  
564 (2014 SGR 201).

565

566 **AUTHOR CONTRIBUTIONS**

567 H.L.M. performed research, analyzed data, and draft the manuscript. L.G., M.M., Q.R and  
568 M.G.B, performed research and analyzed data. J.G. designed research, analyzed data, and wrote  
569 the manuscript.

570

571 **ADDITIONAL INFORMATION**

572 **Competing financial interests** □

573 The authors declare no competing financial interests.

574

575

576 **FIGURE LEGENDS**

577 **Figure 1. *FBti0019170* is a full-length *F-element*, 4,696 bp, inserted in the third intron of**  
578 ***kuzbanian*.**

579 (A) *kuzbanian* (*kuz*) gene region. White boxes represent UTRs, black boxes represent exons,  
580 black lines represent introns and intergenic regions, and the red box represents the *FBti0019170*  
581 insertion. (B) The region amplified represents *FBti0019170* insertion (2L: 13,560,515-  
582 13,565,210) and its flanking regions. Black arrows show the approximate localization of the  
583 three primers designed to check for the presence/absence of *FBti0019170*. (C) Predicted Metal  
584 Response Elements are represented in purple: one is located inside *FBti0019170* insertion and  
585 the other three in *kuz*'s third intron (see Table S2).

586

587 **Figure 2. *kuz-overexpressing* flies are associated with zinc stress tolerance.**

588 Survival curves under nonstress (discontinuous lines) and under zinc stress (continuous lines)  
589 conditions are represented in purple for *kuz-overexpressing* flies, and in green for *kuz-wildtype*

590 flies. The first replica (A) and the second replica (B) showed that *kuz-overexpressing* flies are  
591 more tolerant to zinc stress both in males and in female flies. Each data point in the survival  
592 curves represent the average survival for 15 tubes containing 20 flies each for zinc stress  
593 conditions and 10 tubes containing 20 flies each for nonstress conditions. In each data point,  
594 error bars represent the standard error of the mean (SEM).

595

596 **Figure 3. *kuz-overexpressing* embryos have a higher egg to adult viability under zinc stress.**

597 Each column represents the average of egg to adult viability. *kuz-overexpressing* flies are  
598 represented in purple and *kuz-wildtype* flies are represented in green. In each data point, error  
599 bars represent the standard error of the mean (SEM).

600

601 **Figure 4. Outbred flies with *FBti0019170* insertion are associated with zinc stress tolerance.**

602 Survival curves under non-stress conditions (discontinuous lines), and under zinc stress  
603 (continuous lines) are represented in red for outbred flies with *FBti0019170* insertion, and in  
604 black for outbred flies without the insertion. The first (A) and the second replica (B) showed the  
605 same results for both males and females. Each data point in the survival curves represent the  
606 average survival for 15 tubes containing 20 flies each for zinc stress conditions and 10 tubes  
607 containing 20 flies each for nonstress conditions. In each data point, error bars represent the  
608 standard error of the mean (SEM).

609

610 **Figure 5. Egg to adult viability in outbred flies with *FBti0019170* is lower than in outbred**  
611 **flies without *FBti0019170* in nonstress and in zinc stress conditions.**

612 Each column represents the average of egg to adult viability of 15 vials for zinc stress conditions  
613 and 10 vials for nonstress conditions. Outbred flies without the insertion are represented in black  
614 and outbred flies with the insertion are represented in red.

615

616

617 **Figure 6. Isofemale strains with *FBti0019170* insertion are more sensitive or more tolerant**  
618 **to zinc stress depending on the genetic background.**

619 Survival curves under non-stress conditions (discontinuous lines) and under zinc stress  
620 (continuous lines) are represented in red for flies with *FBti0019170* insertion, and in black for  
621 flies without the insertion. (A) Survival curves for *IV22* vs *B47* (first replicate), (B) Survival  
622 curves for *IV22* vs *B47* (second replicate), (C) survival curves for *IV145* vs *B47*, and (D) survival  
623 curves for *B45* vs *B47*. Each data point in the survival curves represent the average survival for  
624 15 tubes containing 20 flies each for zinc stress conditions and 10 tubes containing 20 flies each  
625 for nonstress conditions. Error bars represent the standard error of the mean (SEM) for each  
626 datapoint.

627

628 **Figure 7. Egg to adult viability in isofemale strains with and without *FBti0019170* depends**  
629 **on the genetic background**

630 Each column represents the average of egg to adult viability of 15 vials for zinc stress conditions  
631 and 10 vials for nonstress conditions. Strains without the insertion are represented in black and  
632 strains with the insertion are represented in red. (A) Egg to adult viability in *IV22* flies with  
633 *FBti0019170* and *B47* flies without *FBti0019170*, (B) in *B38* flies with and without *FBti0019170*  
634 (C) and in *IV52* flies with and without *FBti0019170*.

635

636

637 **Figure 8. Flies homozygous for the presence and for the absence of *FBti0019170* showed no**  
638 **differences in *kuz* expression.**

639 Normalized expression level relative to *Act5C* of *kuz* in nonstress and zinc stress conditions in  
640 male and female flies. Flies without *FBti0019170* insertion are represented in grey and flies with  
641 *FBti0019170* are represented in red. Error bars represent the SEM of three biological replicas.

642

643  
644

**Table 1. Log-rank analysis results and odds-ratio of heavy metal stress experiments performed with adult flies.**

| Compared Strains                                                            | Sex    | Replica 1 |                                     | Replica 2 |                          |
|-----------------------------------------------------------------------------|--------|-----------|-------------------------------------|-----------|--------------------------|
|                                                                             |        | P-value   | Odds ratio                          | P-value   | Odds ratio               |
| <i>kuz-overexpressing vs. kuz-wildtype</i><br>(Fig. 2)                      | Male   | << 0.001  | <b>2.37</b> (1.7-3.32)              | << 0.001  | <b>3.18</b> (2.25-4.50)  |
|                                                                             | Female | << 0.001  | <b>2.19</b> (1.57-3.057)            | << 0.001  | <b>3</b> (2.12-4.24)     |
| Outbred <i>FBti0019170(+)</i> vs.<br>Outbred <i>FBti0019170(-)</i> (Fig. 4) | Male   | << 0.001  | <b>2.32</b> (1.65-3.2395)           | << 0.001  | <b>2</b> (1.44-2.78)     |
|                                                                             | Female | << 0.001  | <b>1.97</b> (1.42-2.74)             | << 0.001  | <b>2.45</b> (1.75-3.43)  |
| <i>IV22 FBti0019170(+)</i> vs.<br><i>B47 FBti0019170(-)</i> (Fig. 6A-6B)    | Male   | << 0.001  | <b>5.38</b> (3.6633-7.91)           | << 0.001  | <b>2.85</b> (2.02-4.012) |
|                                                                             | Female | << 0.001  | <b>4</b> (2.78-5.75)                | << 0.001  | <b>3.23</b> (2.27-4.58)  |
| <i>IV145 FBti0019170(+)</i> vs<br><i>B47 FBti0019170(-)</i> (Fig. 6C)       | Male   | << 0.001  | <b>33.22</b> ( <b>13.11-84.22</b> ) | -         | -                        |
|                                                                             | Female | << 0.001  | <b>2.45</b> ( <b>1.64-3.67</b> )    | -         | -                        |
| <i>B45 FBti0019170(+)</i> vs<br><i>B47 FBti0019170(-)</i> (Fig. 6D)         | Male   | 0.005     | <b>1.76</b> ( <b>1.18-2.61</b> )    | -         | -                        |
|                                                                             | Female | 0.033     | <b>2.11</b> ( <b>1.42-3.15</b> )    | -         | -                        |

645  
646

647 **Table 2. Two-way ANOVA analyses of egg to adult viability experiments.**  
648

| Strains analyzed                                                          | Two-way ANOVA          |             |                    |             |                                                                 |             |
|---------------------------------------------------------------------------|------------------------|-------------|--------------------|-------------|-----------------------------------------------------------------|-------------|
|                                                                           | Experimental condition |             | Insertion genotype |             | Interaction between experimental condition & insertion genotype |             |
|                                                                           | P-value                | Effect size | P-value            | Effect size | P-value                                                         | Effect size |
| <i>kuz-overexpressing vs kuz-wildtype</i> (Fig. 3)                        | <<0.001                | 0.649       | 0.077              | -           | 0.003                                                           | 0.147       |
| Outbred <i>FBti0019170</i> (+) vs outbred <i>FBti0019170</i> (-) (Fig. 5) | <<0.001                | 0.688       | <<0.001            | 0.299       | 0.489                                                           | -           |
| <i>B47 FBti0019170</i> (-) vs <i>IV22 FBti0019170</i> (+) (Fig. 7A)       | <<0.001                | 0.682       | 0.001              | 0.115       | <<0.001                                                         | 0.138       |
| <i>B38 FBti0019170</i> (-) vs <i>B38 FBti0019170</i> (+) (Fig. 7B)        | <<0.001                | 0.750       | 0.426              | -           | <<0.001                                                         | 0.146       |
| <i>IV52 FBti0019170</i> (-) vs <i>IV52 FBti0019170</i> (+) (Fig. 7C)      | <<0.001                | 0.756       | 0.395              | -           | 0.399                                                           | -           |

649

(a) *kuzbanian*: Chromosome 2L: 13,550,139 – 13,639,411

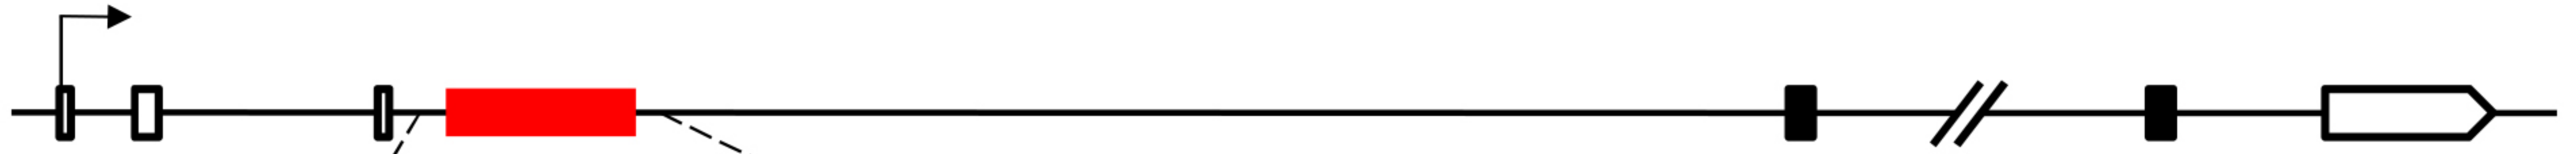

(b)

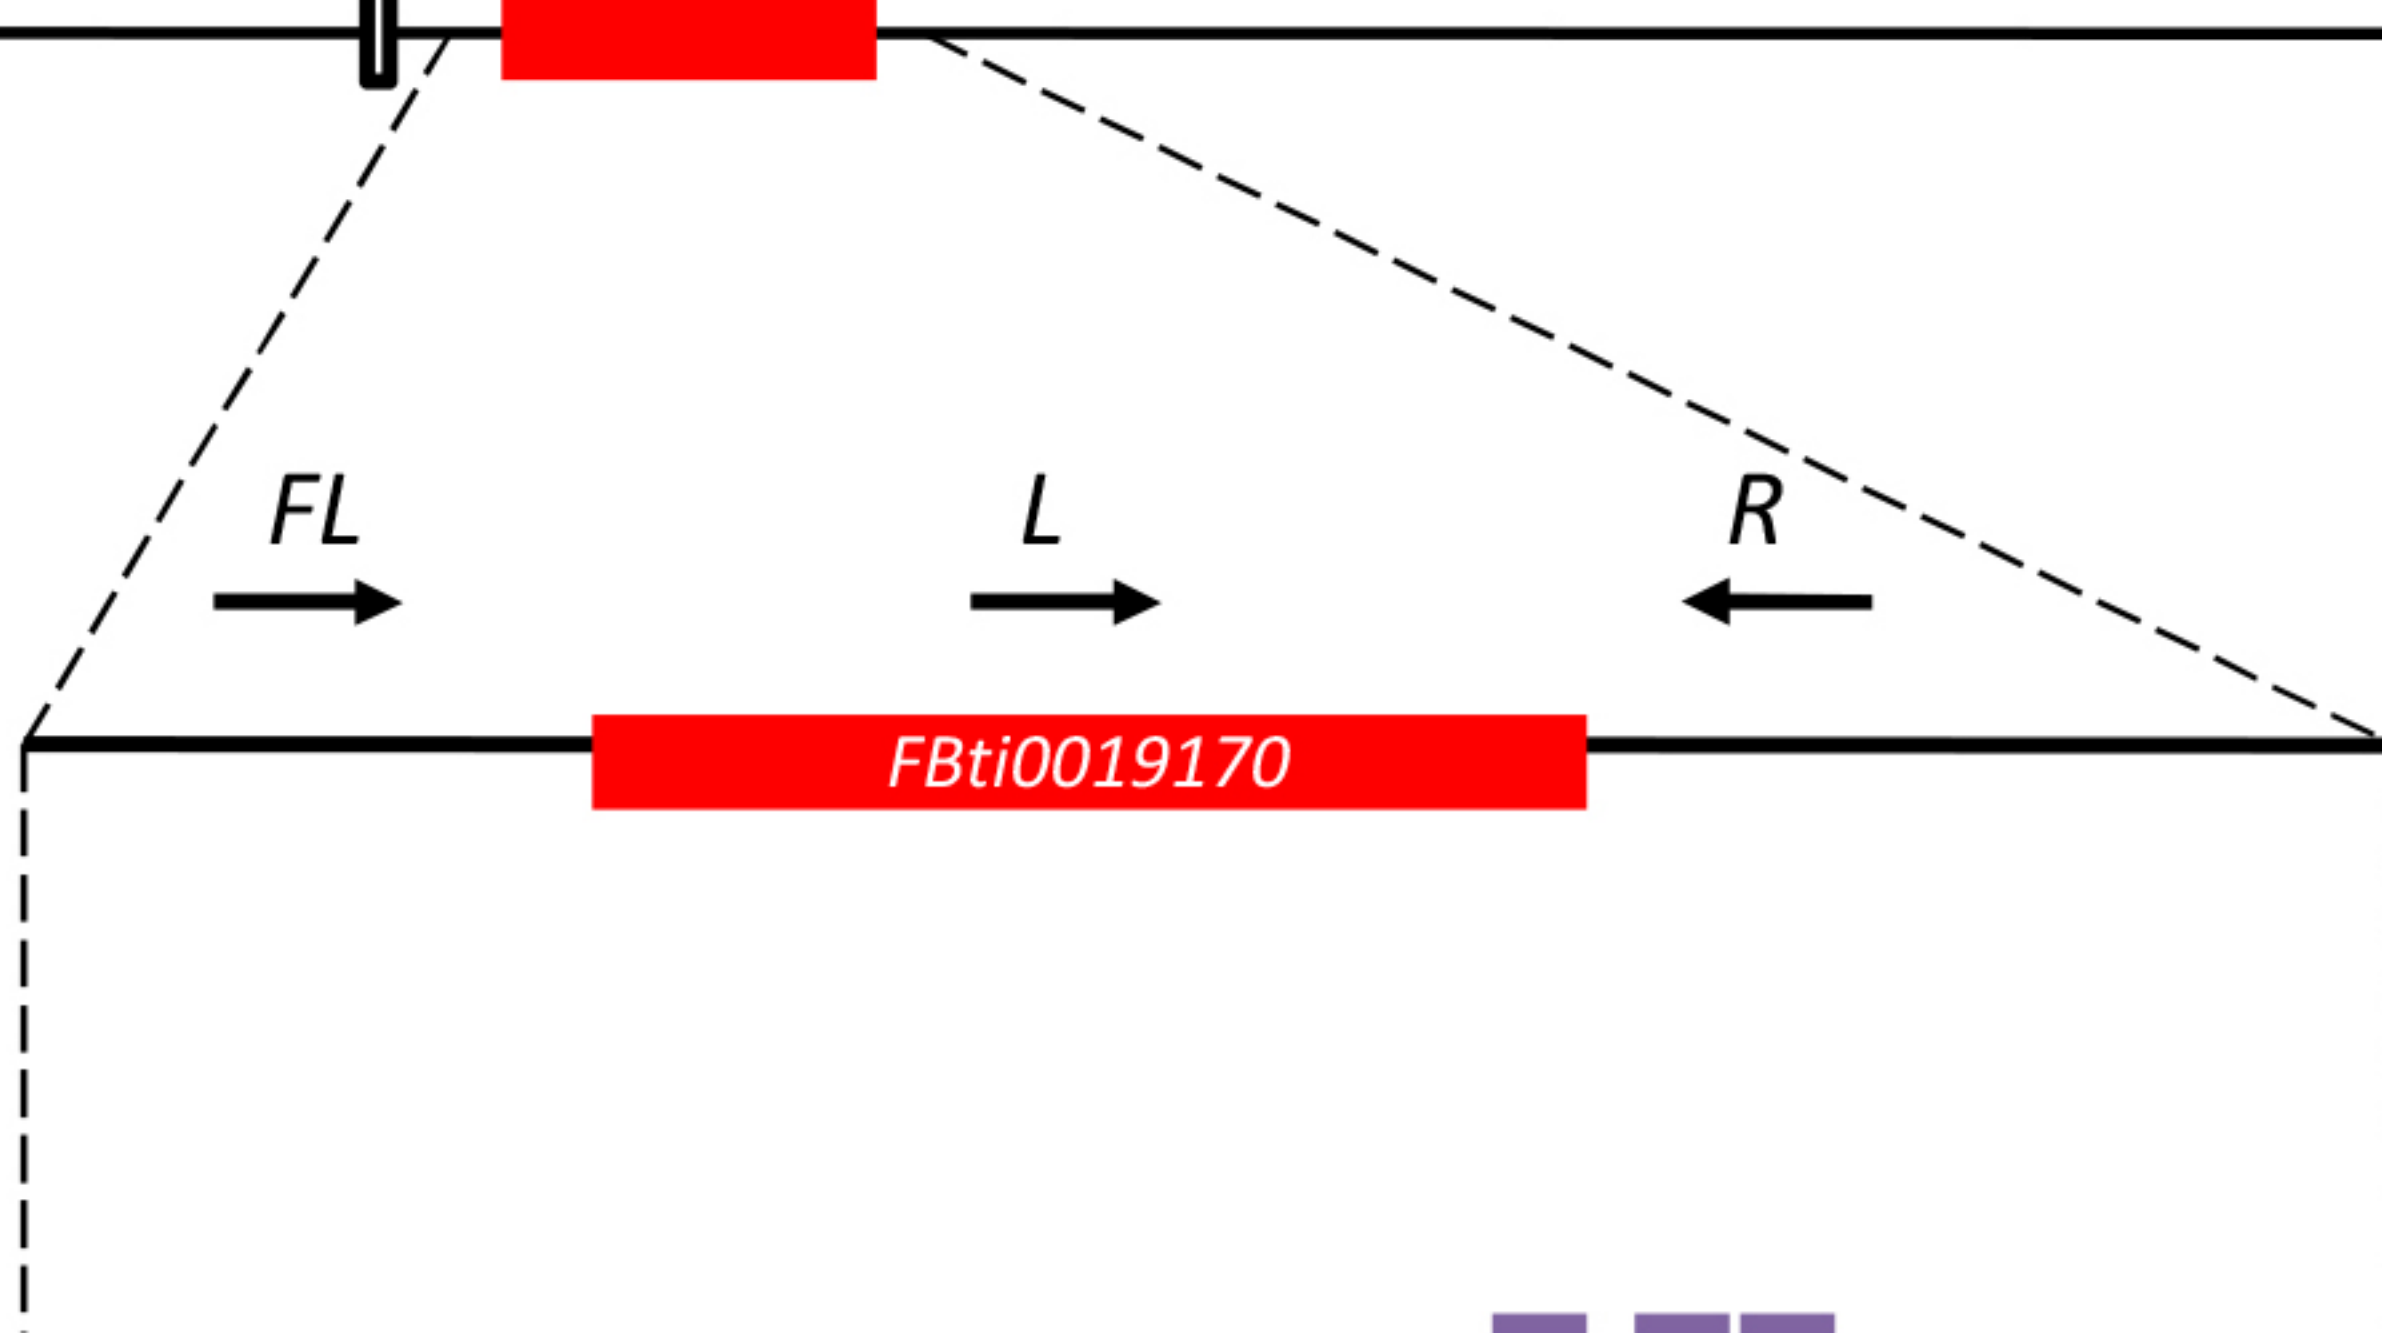

(c) Metal Response Elements

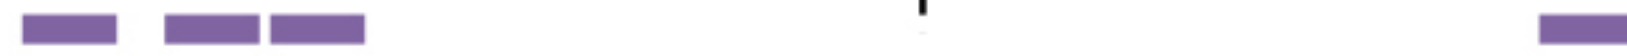



Figure 2

a)

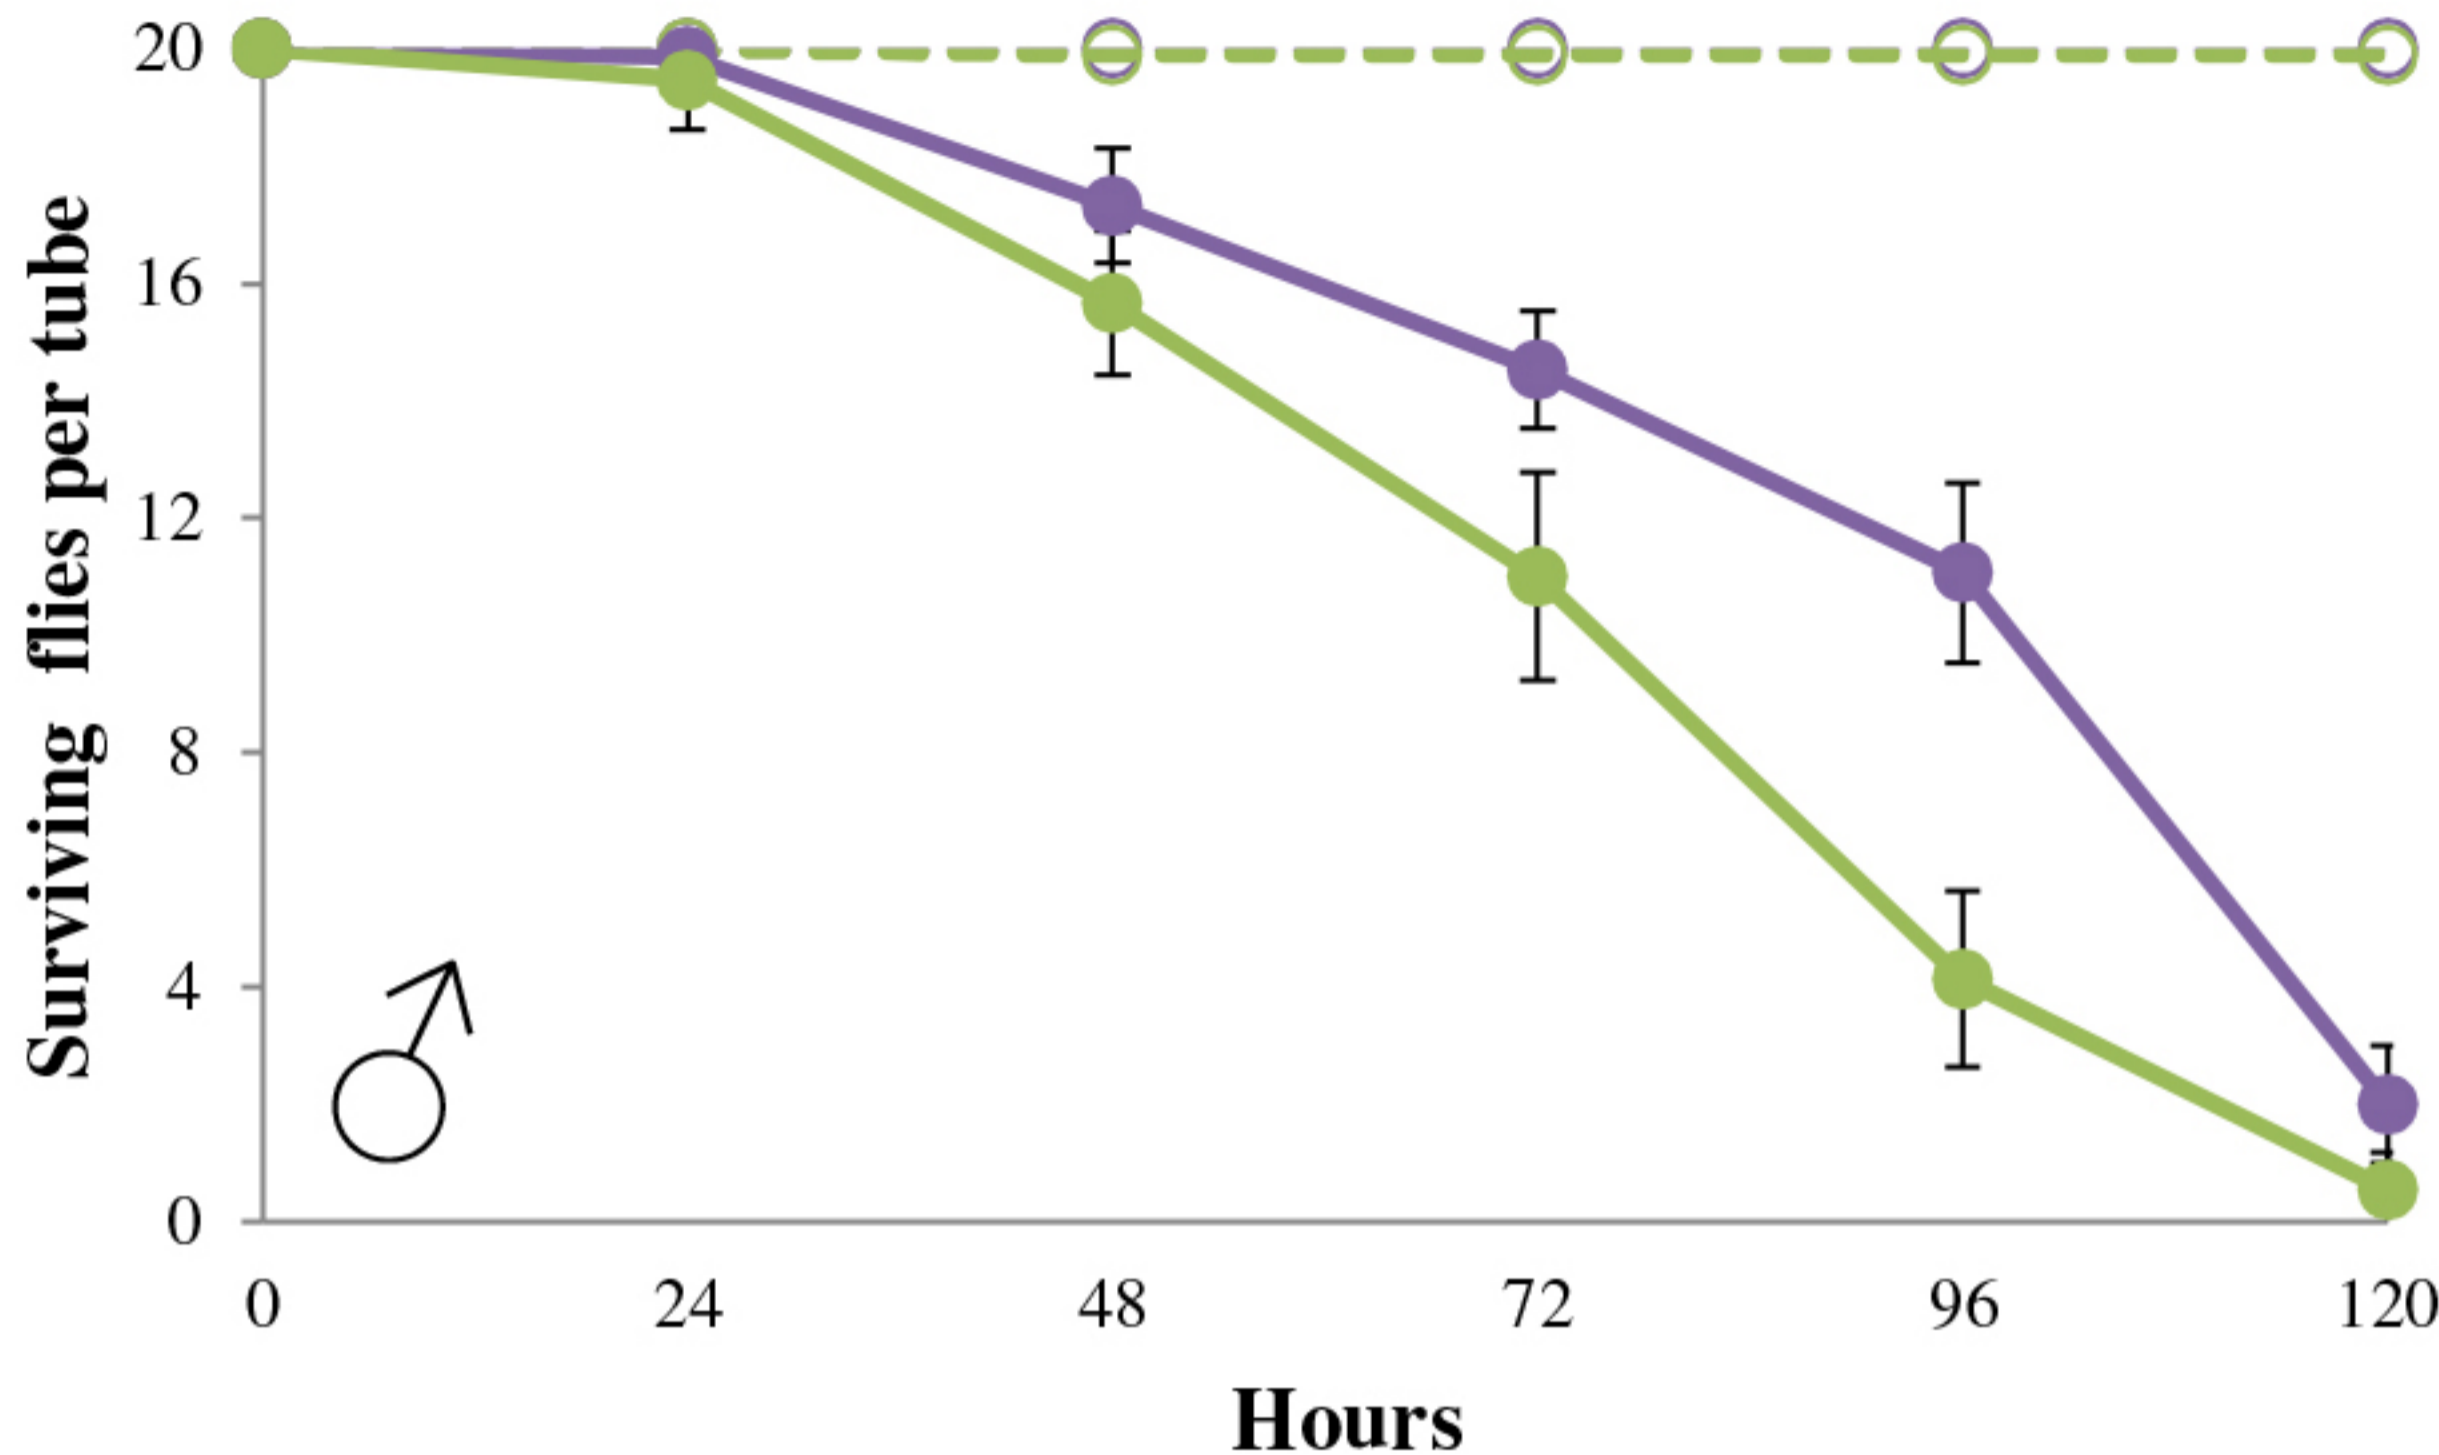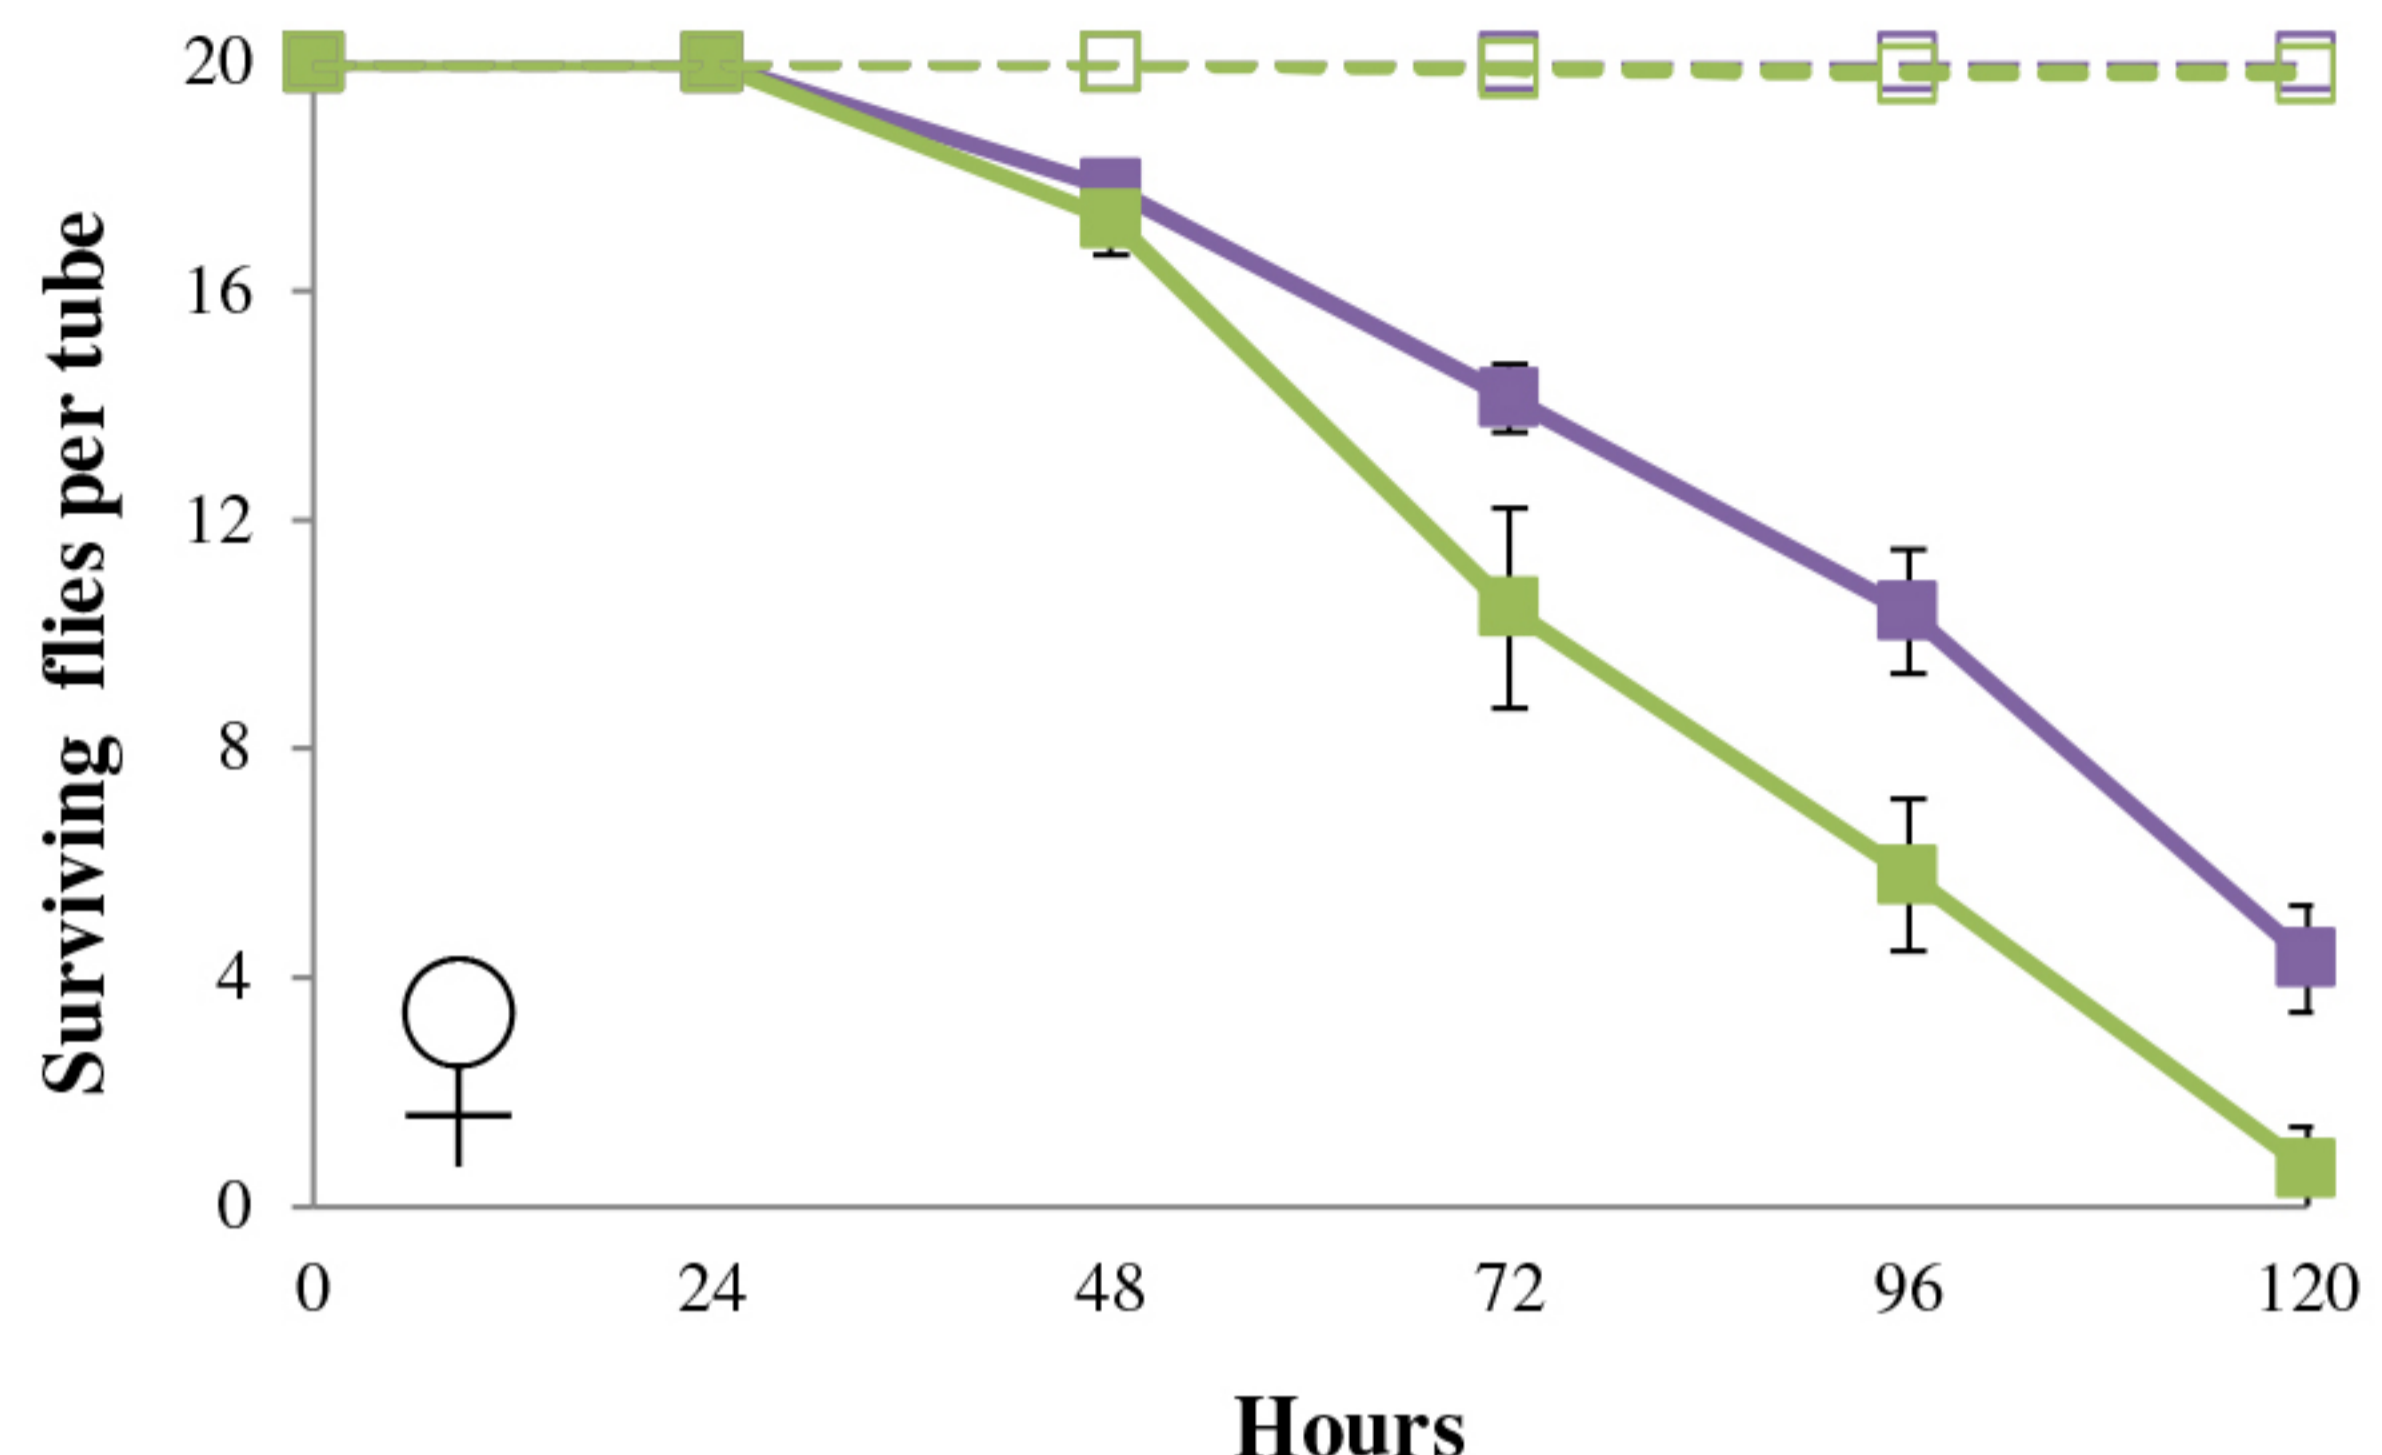

b)

bioRxiv preprint doi: <https://doi.org/10.1101/070243>; this version posted August 18, 2016. The copyright holder for this preprint (which was not certified by peer review) is the author/funder. All rights reserved. No reuse allowed without permission.

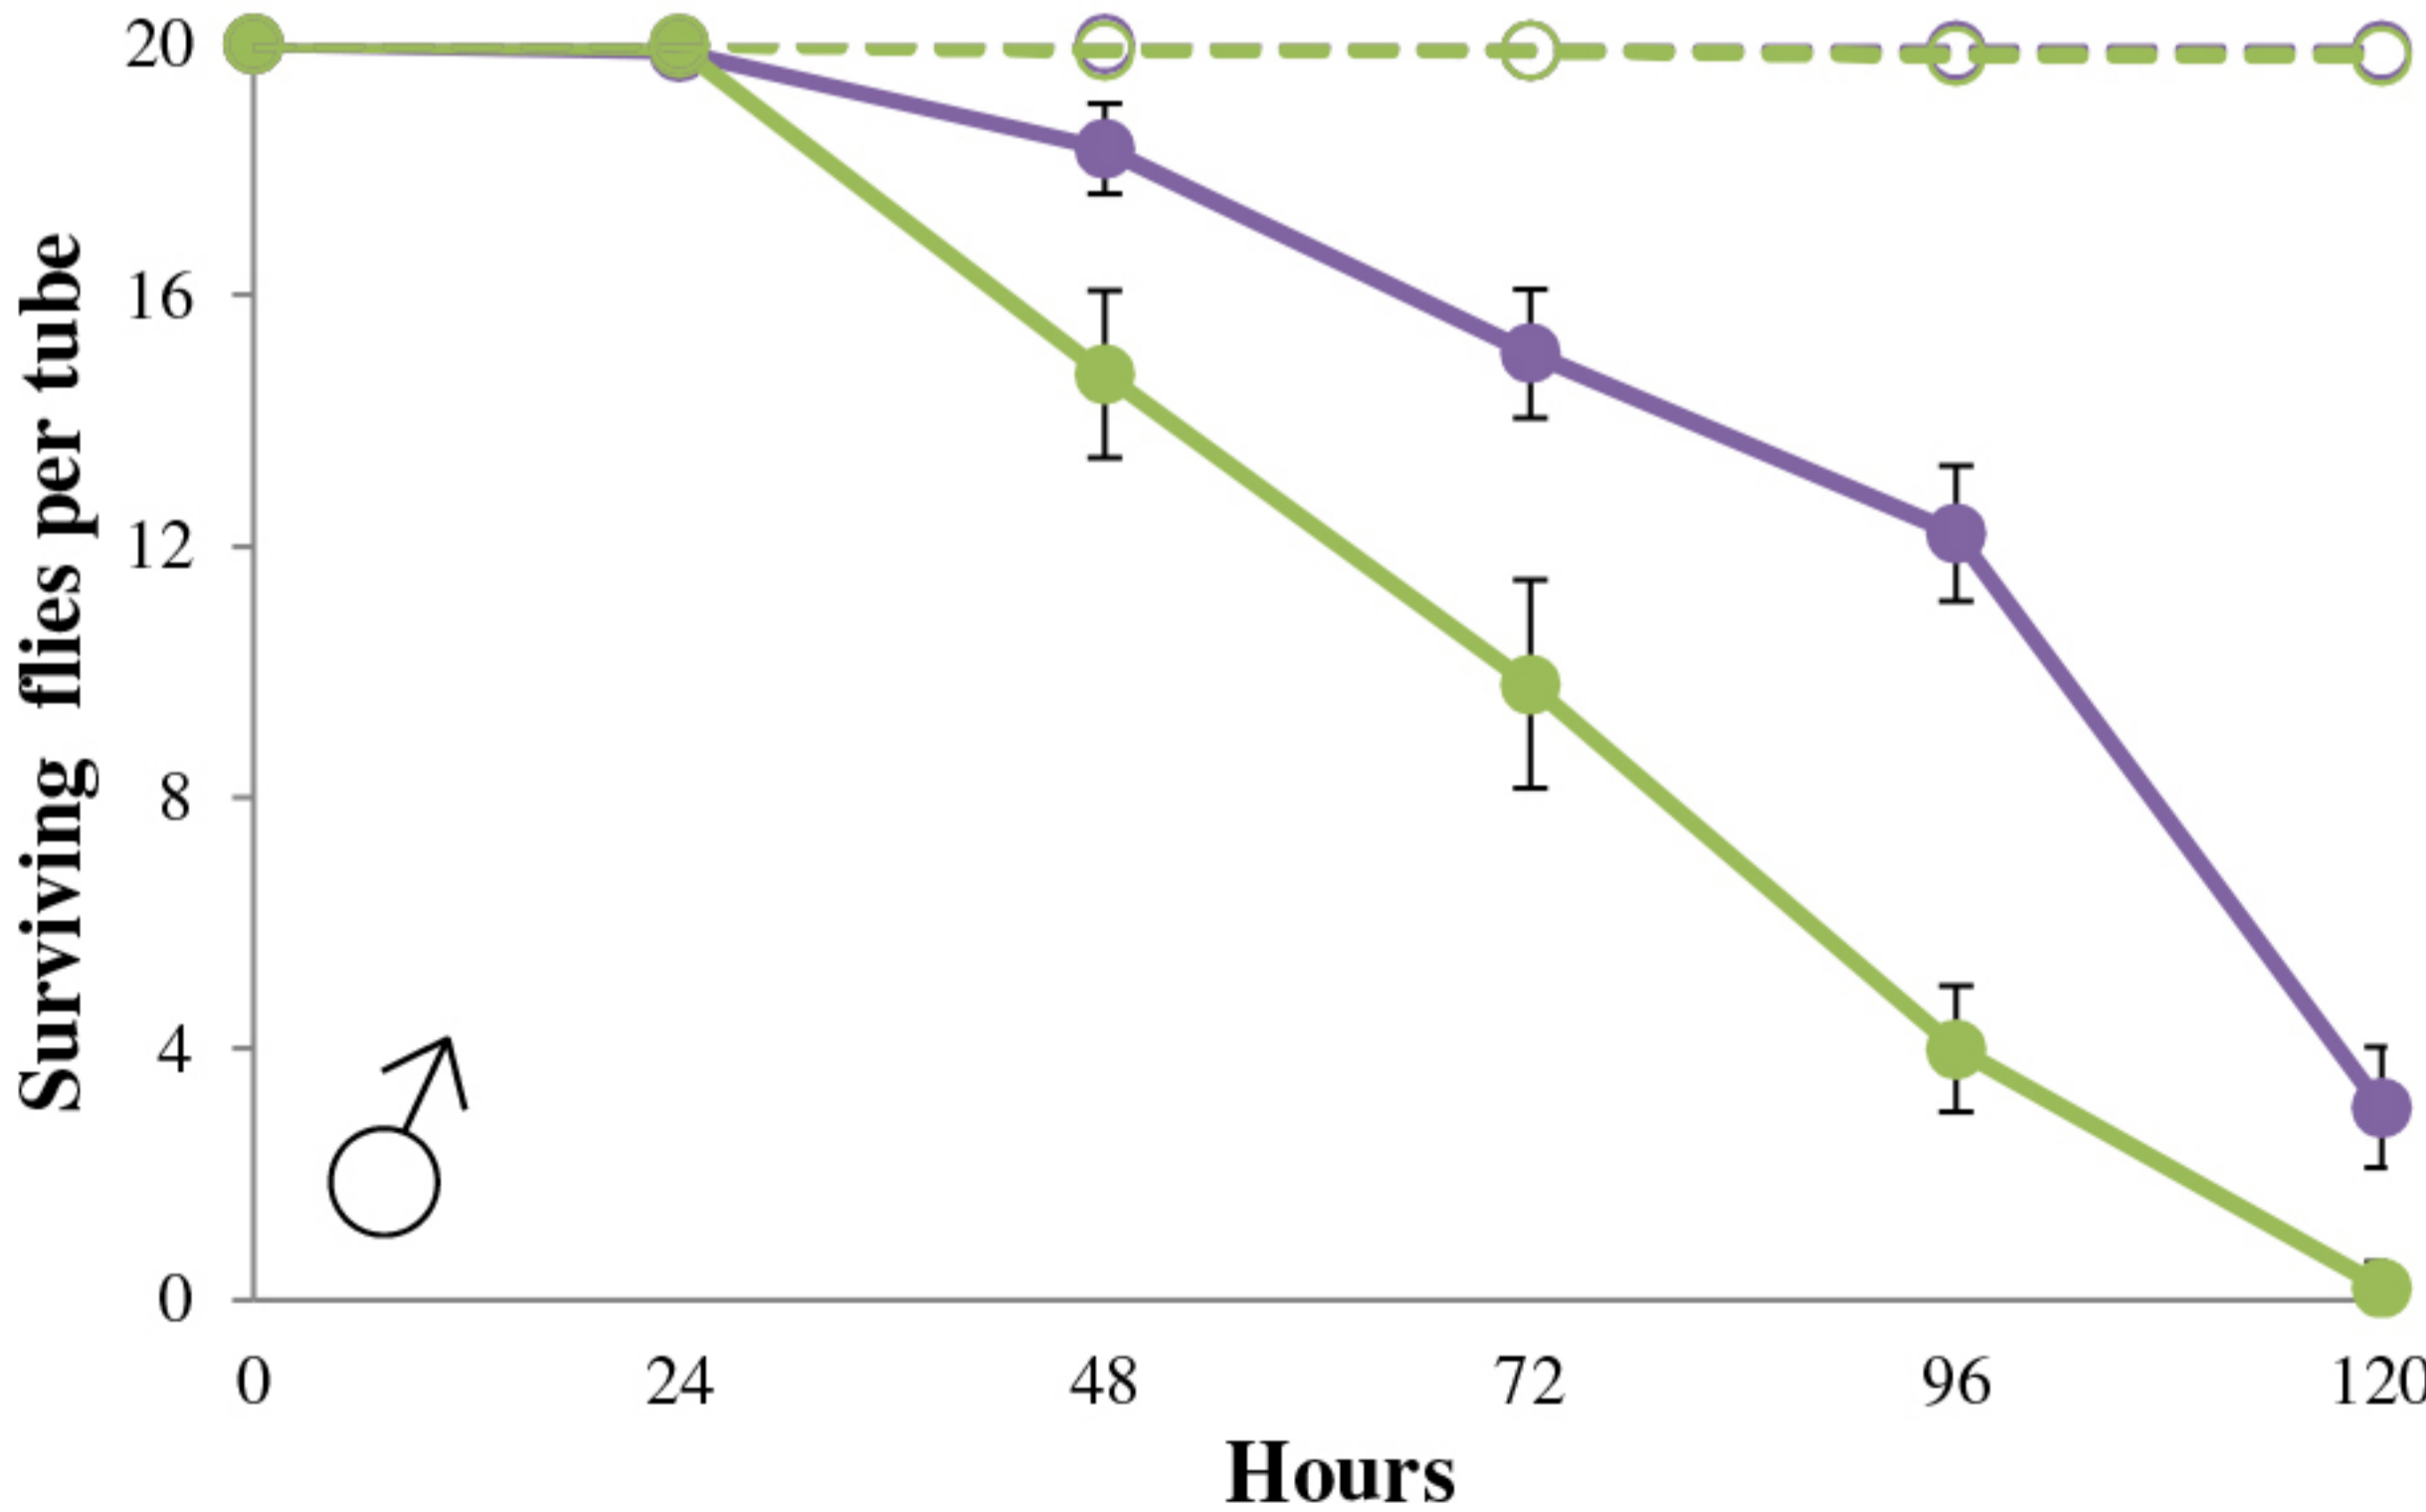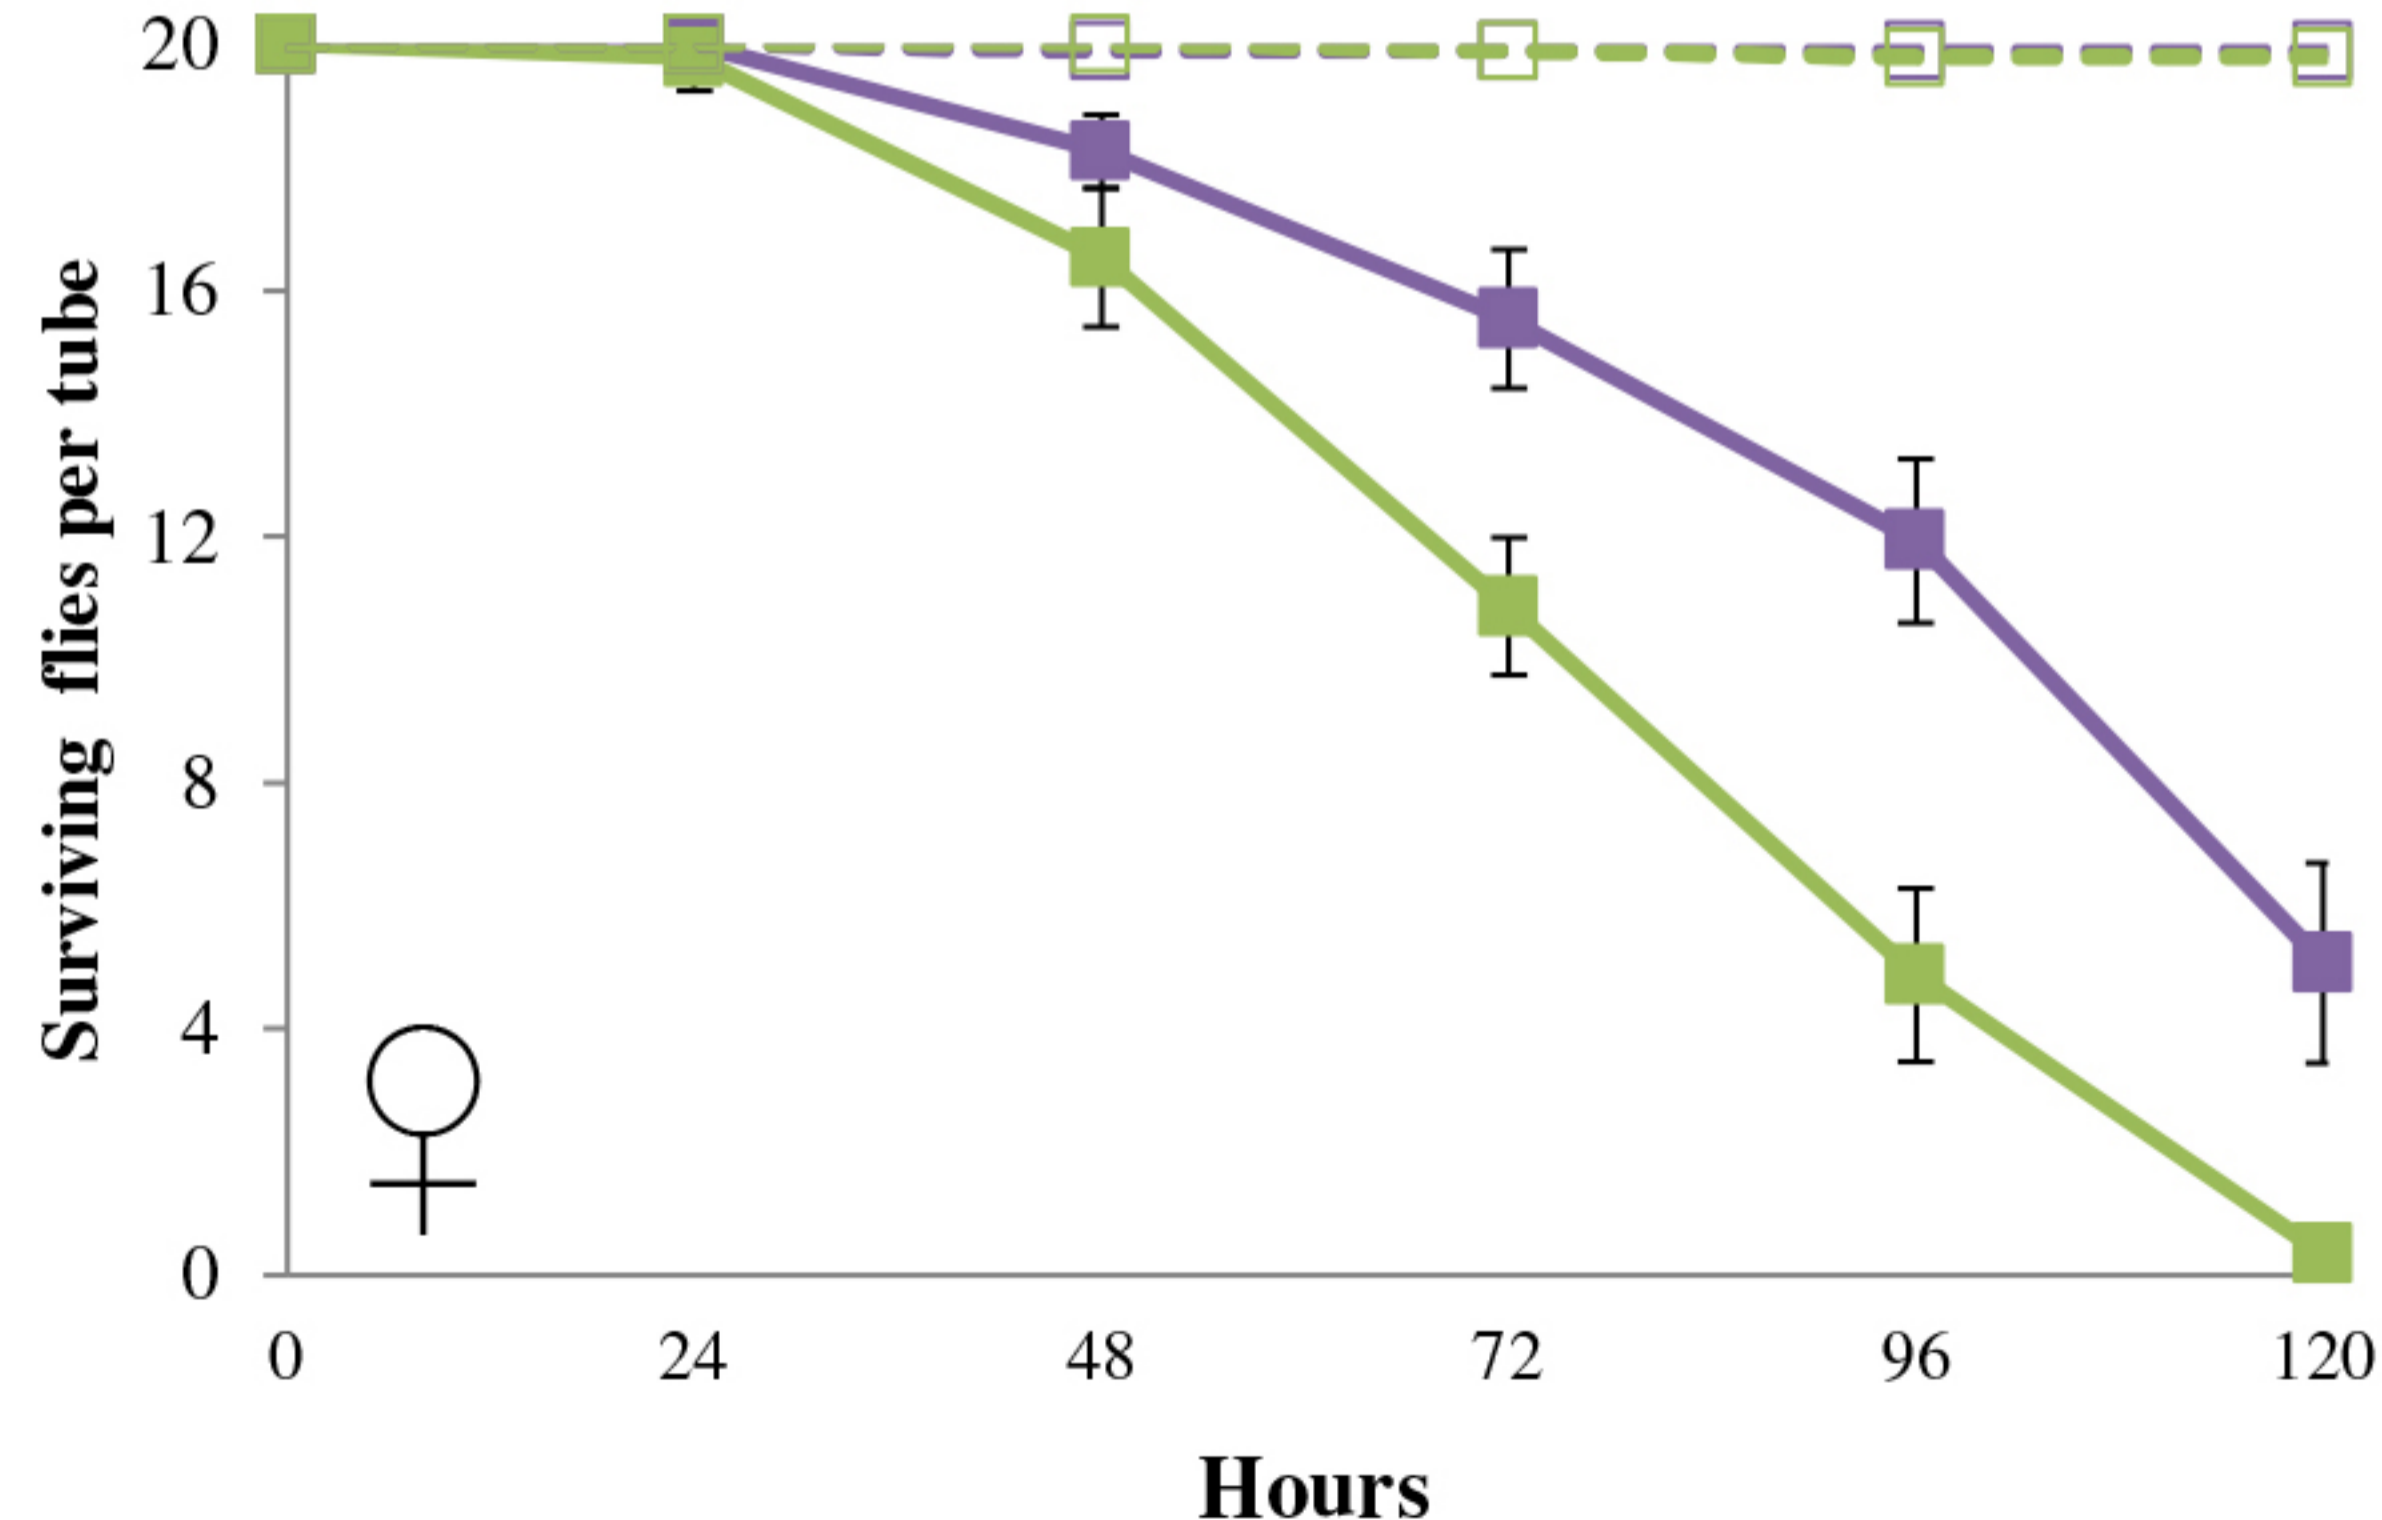

—○— *kuz-wildtype nonstress*  
—●— *kuz-overexpressing* zinc stress  
—■— *kuz-overexpressing*  
—●— *kuz-wildtype zinc stress*

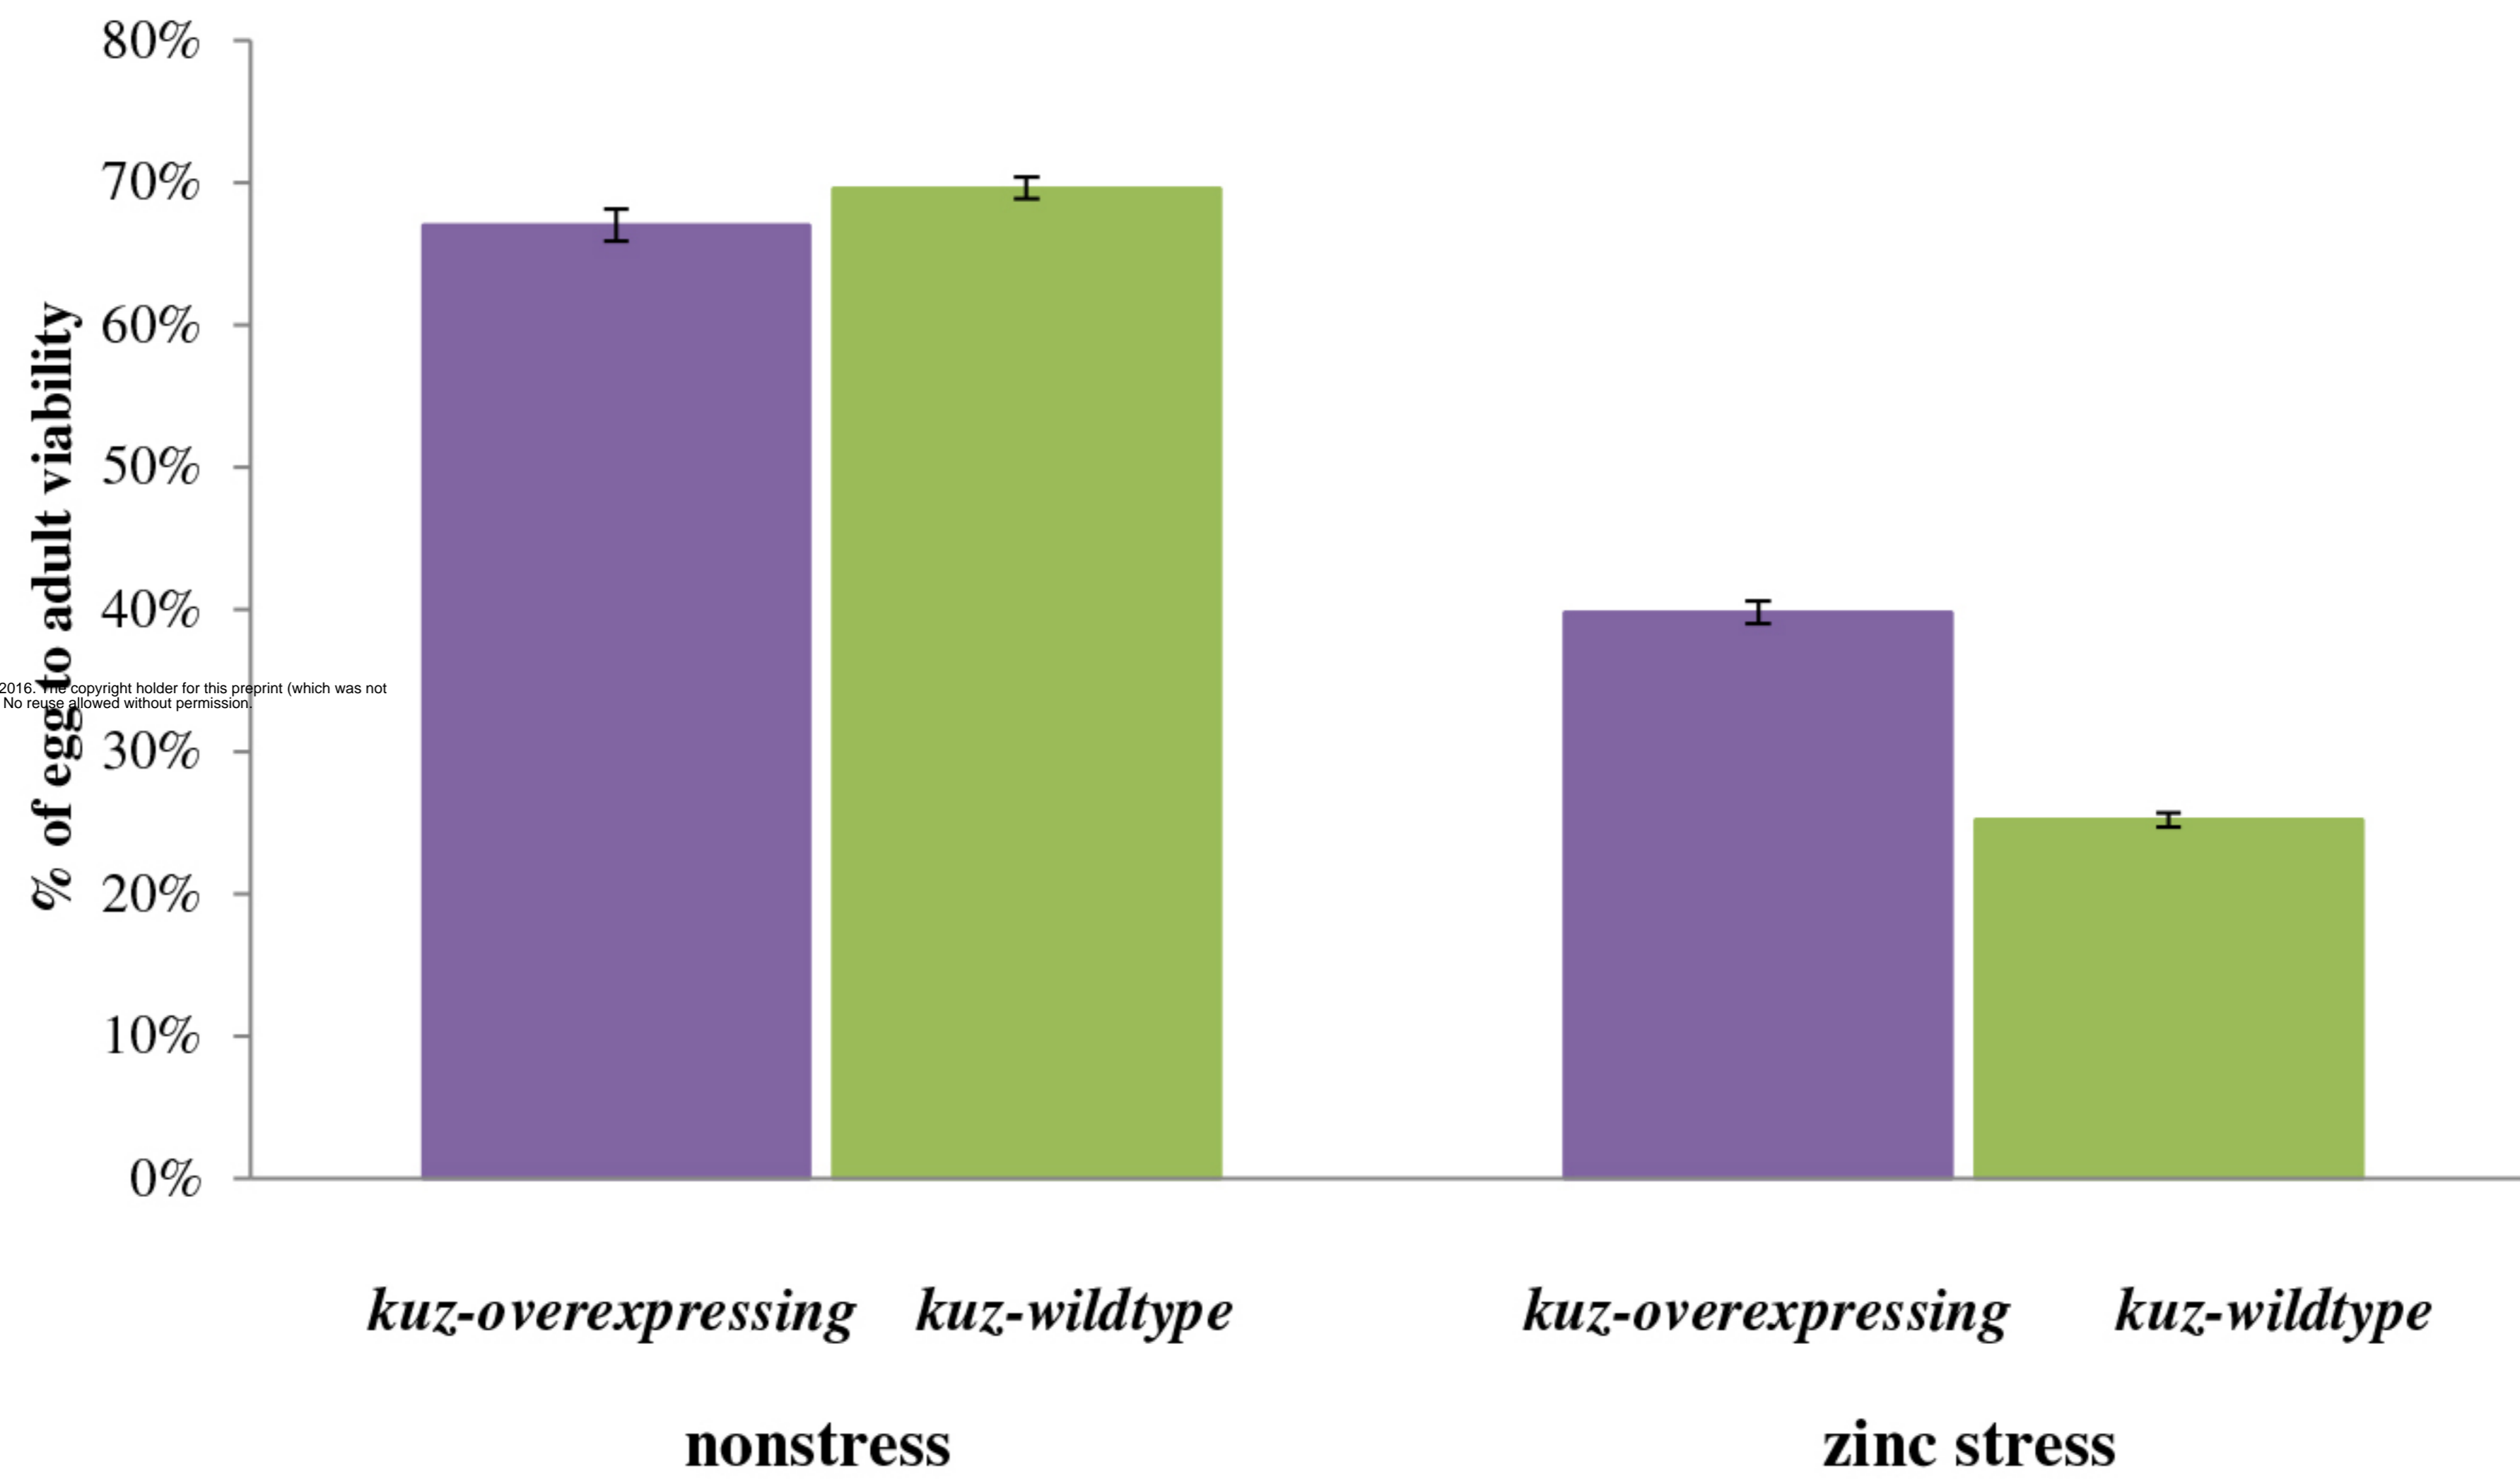

bioRxiv preprint doi: <https://doi.org/10.1101/070243>; this version posted August 18, 2016. The copyright holder for this preprint (which was not certified by peer review) is the author/funder. All rights reserved. No reuse allowed without permission.

a)

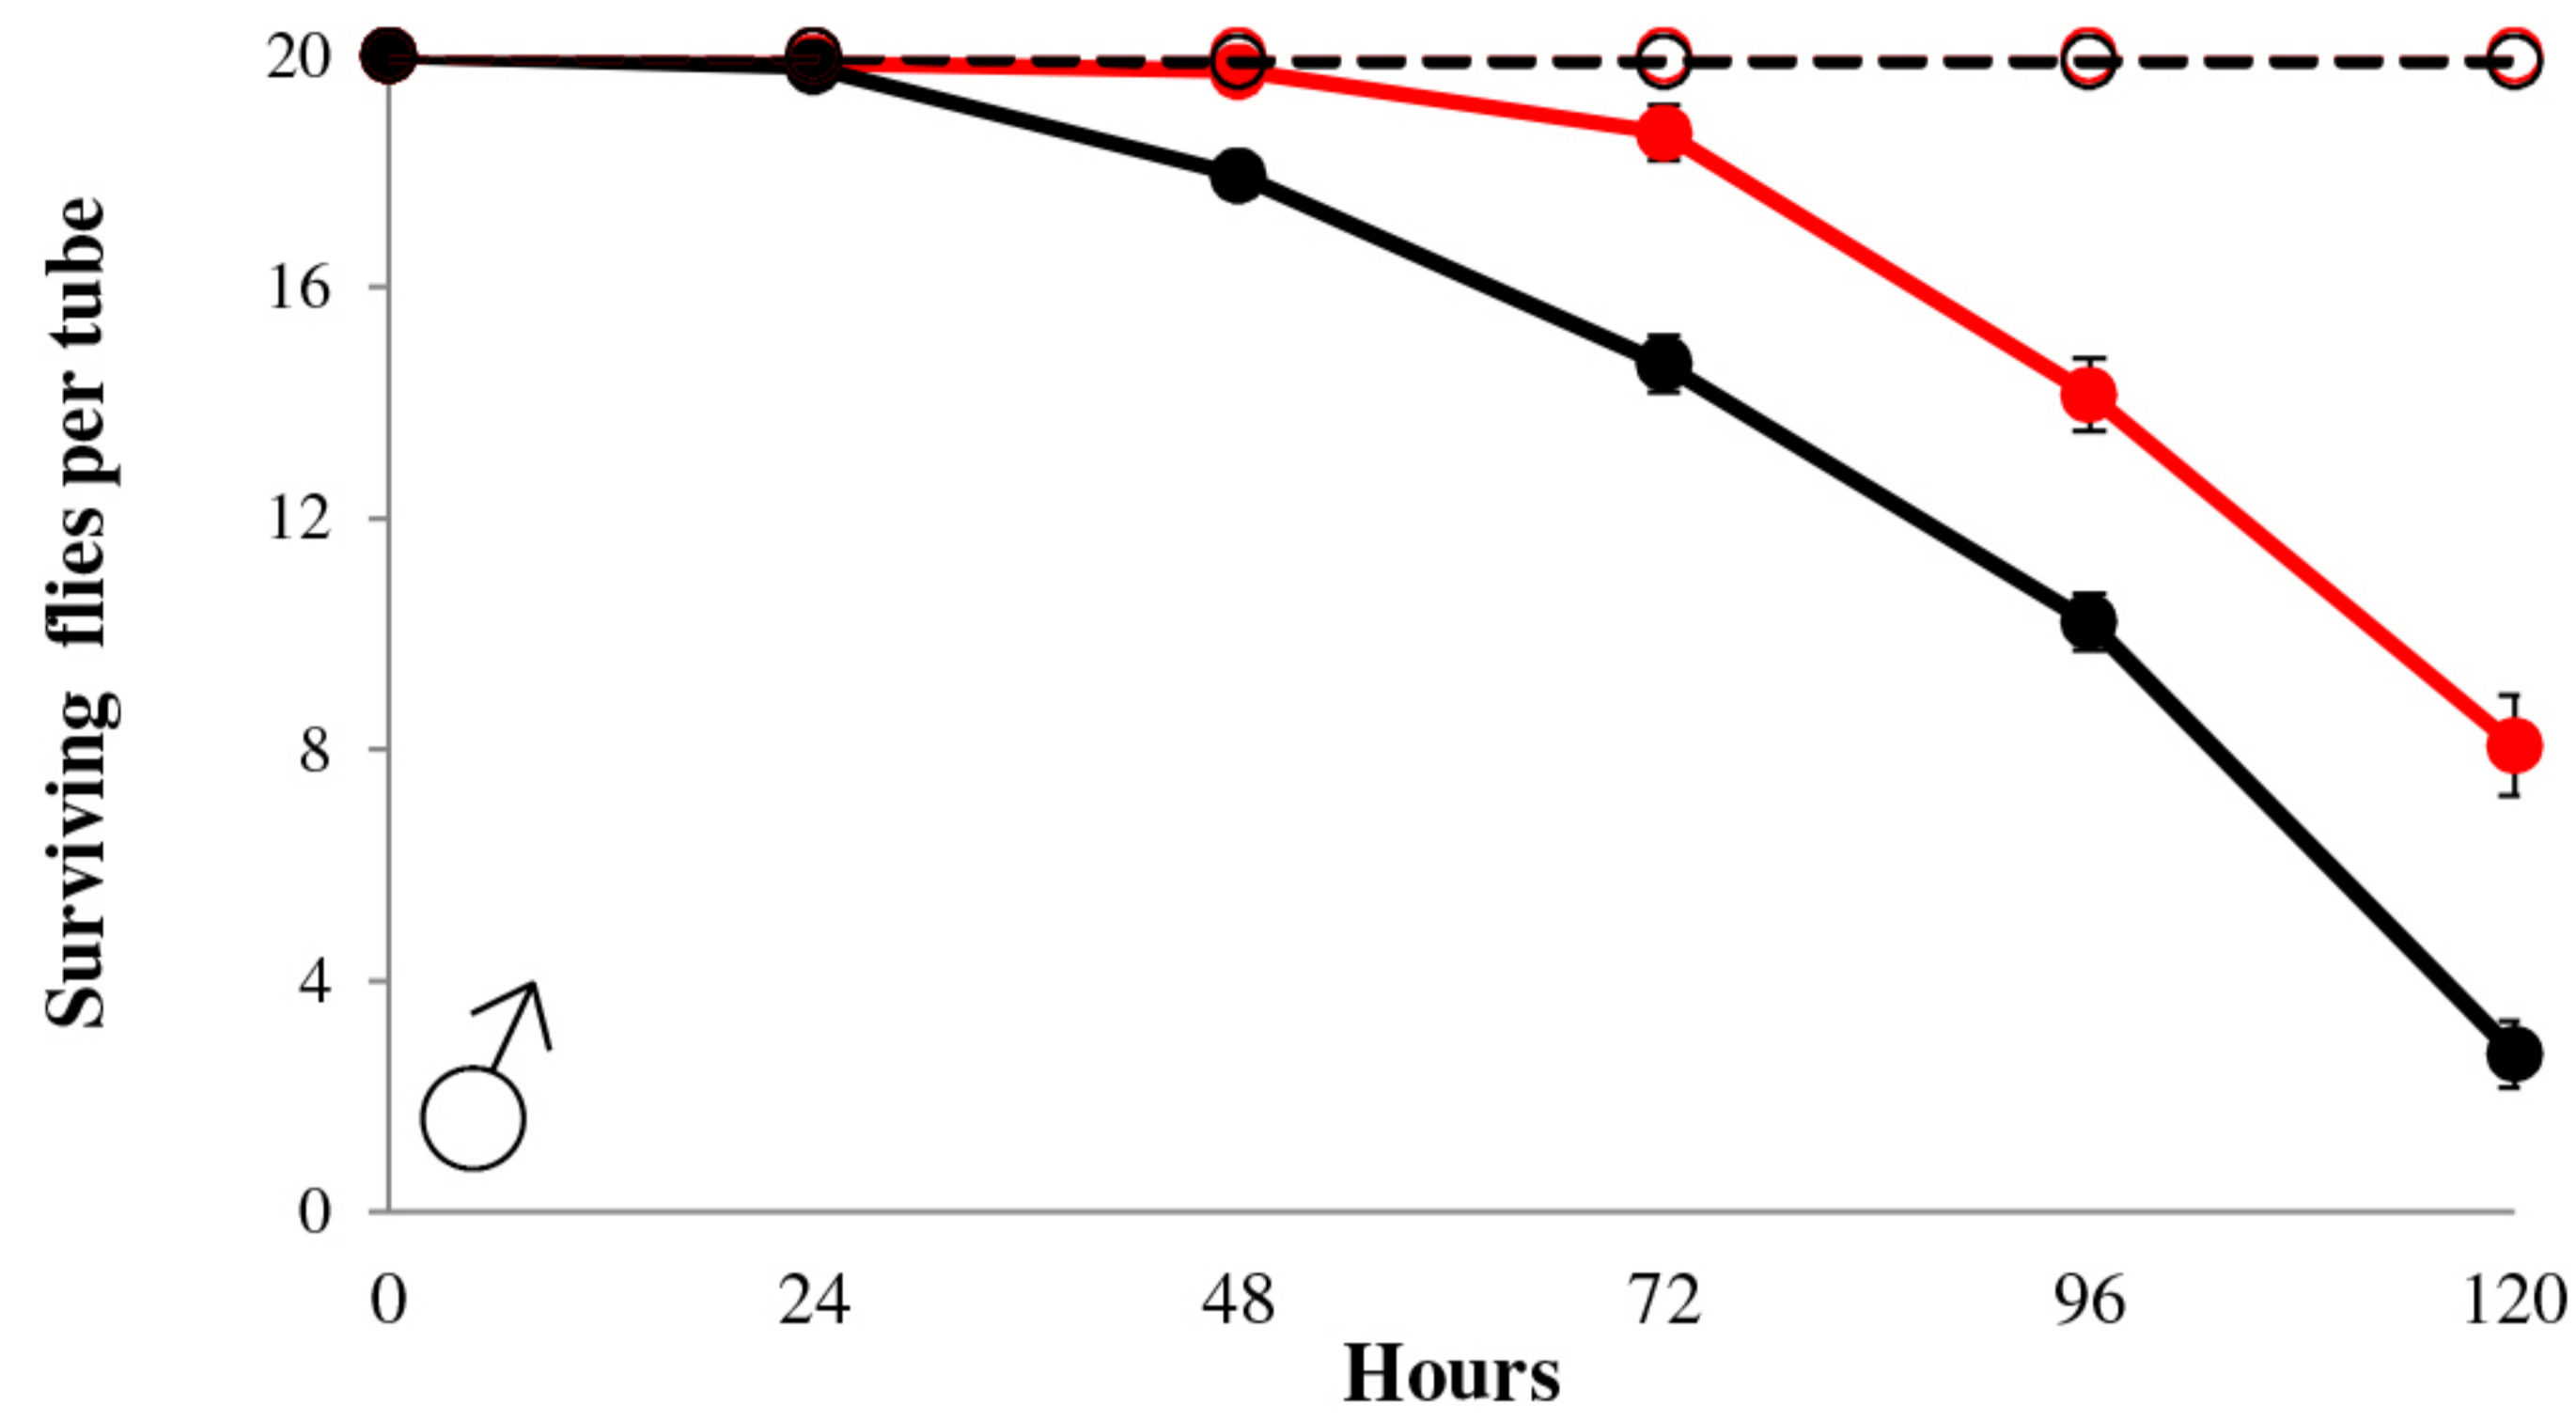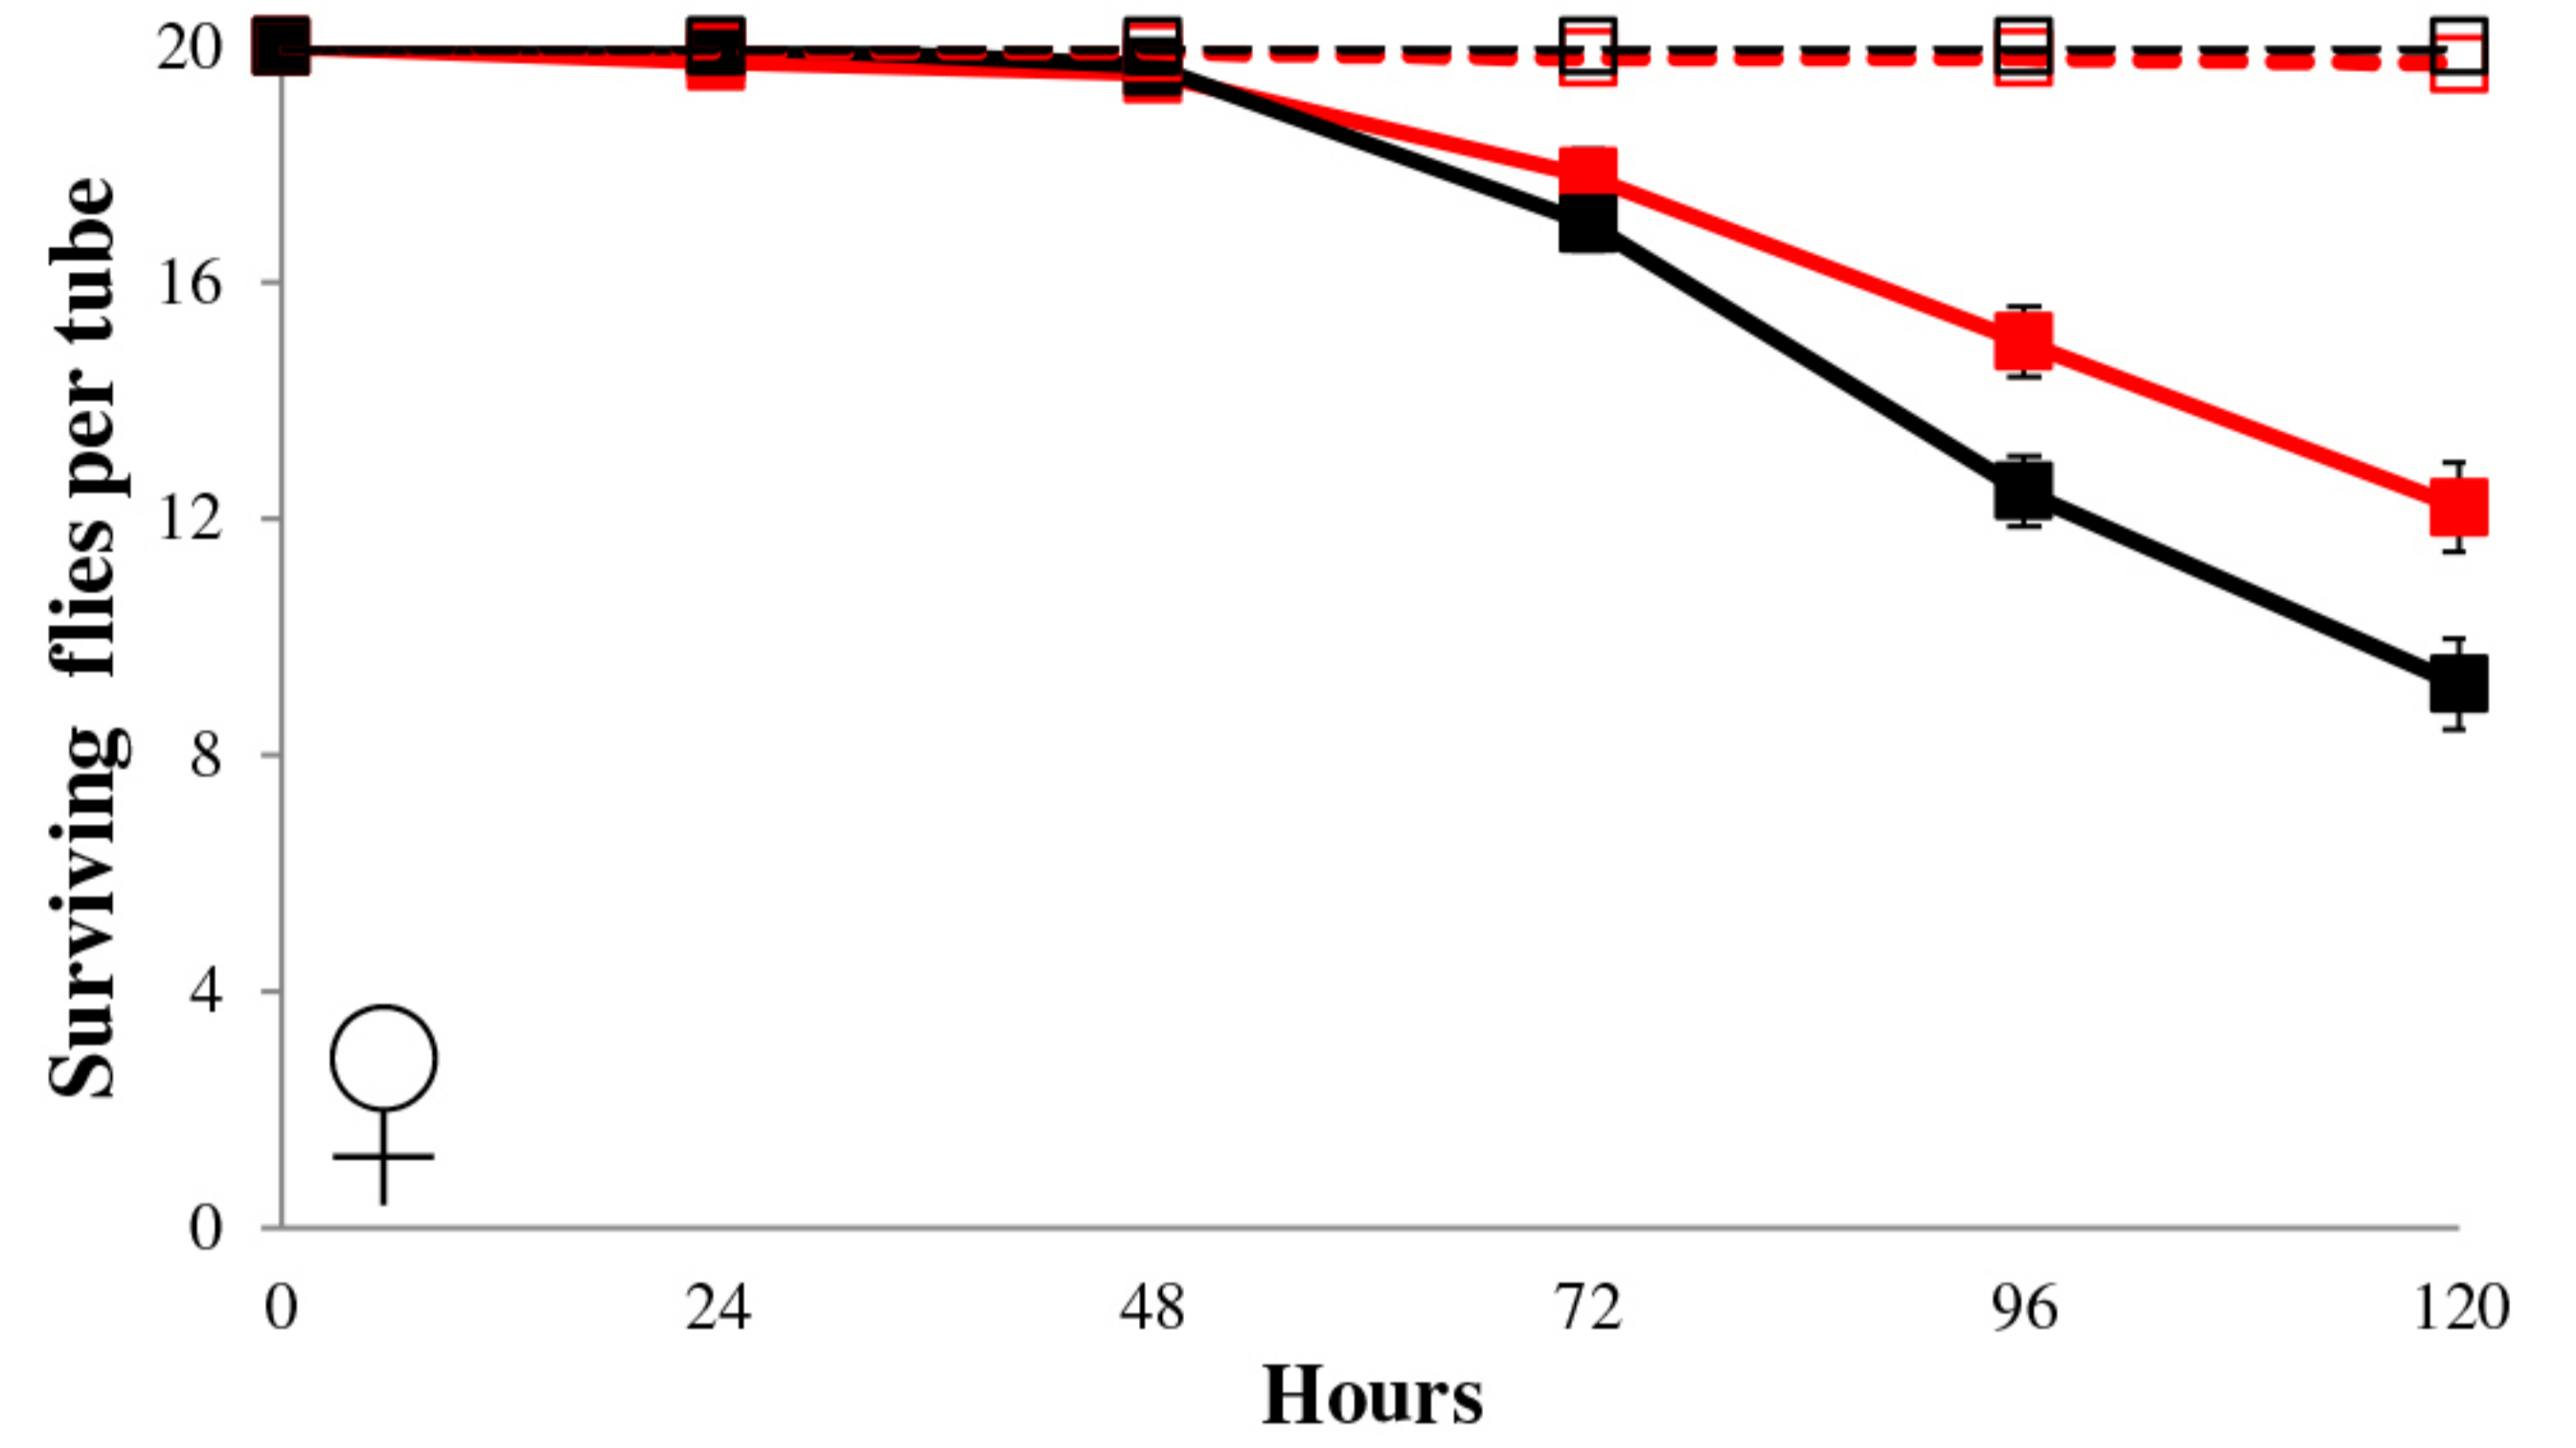

b)

bioRxiv preprint doi: <https://doi.org/10.1101/070243>; this version posted August 18, 2016. The copyright holder for this preprint (which was not certified by peer review) is the author/funder. All rights reserved. No reuse allowed without permission.

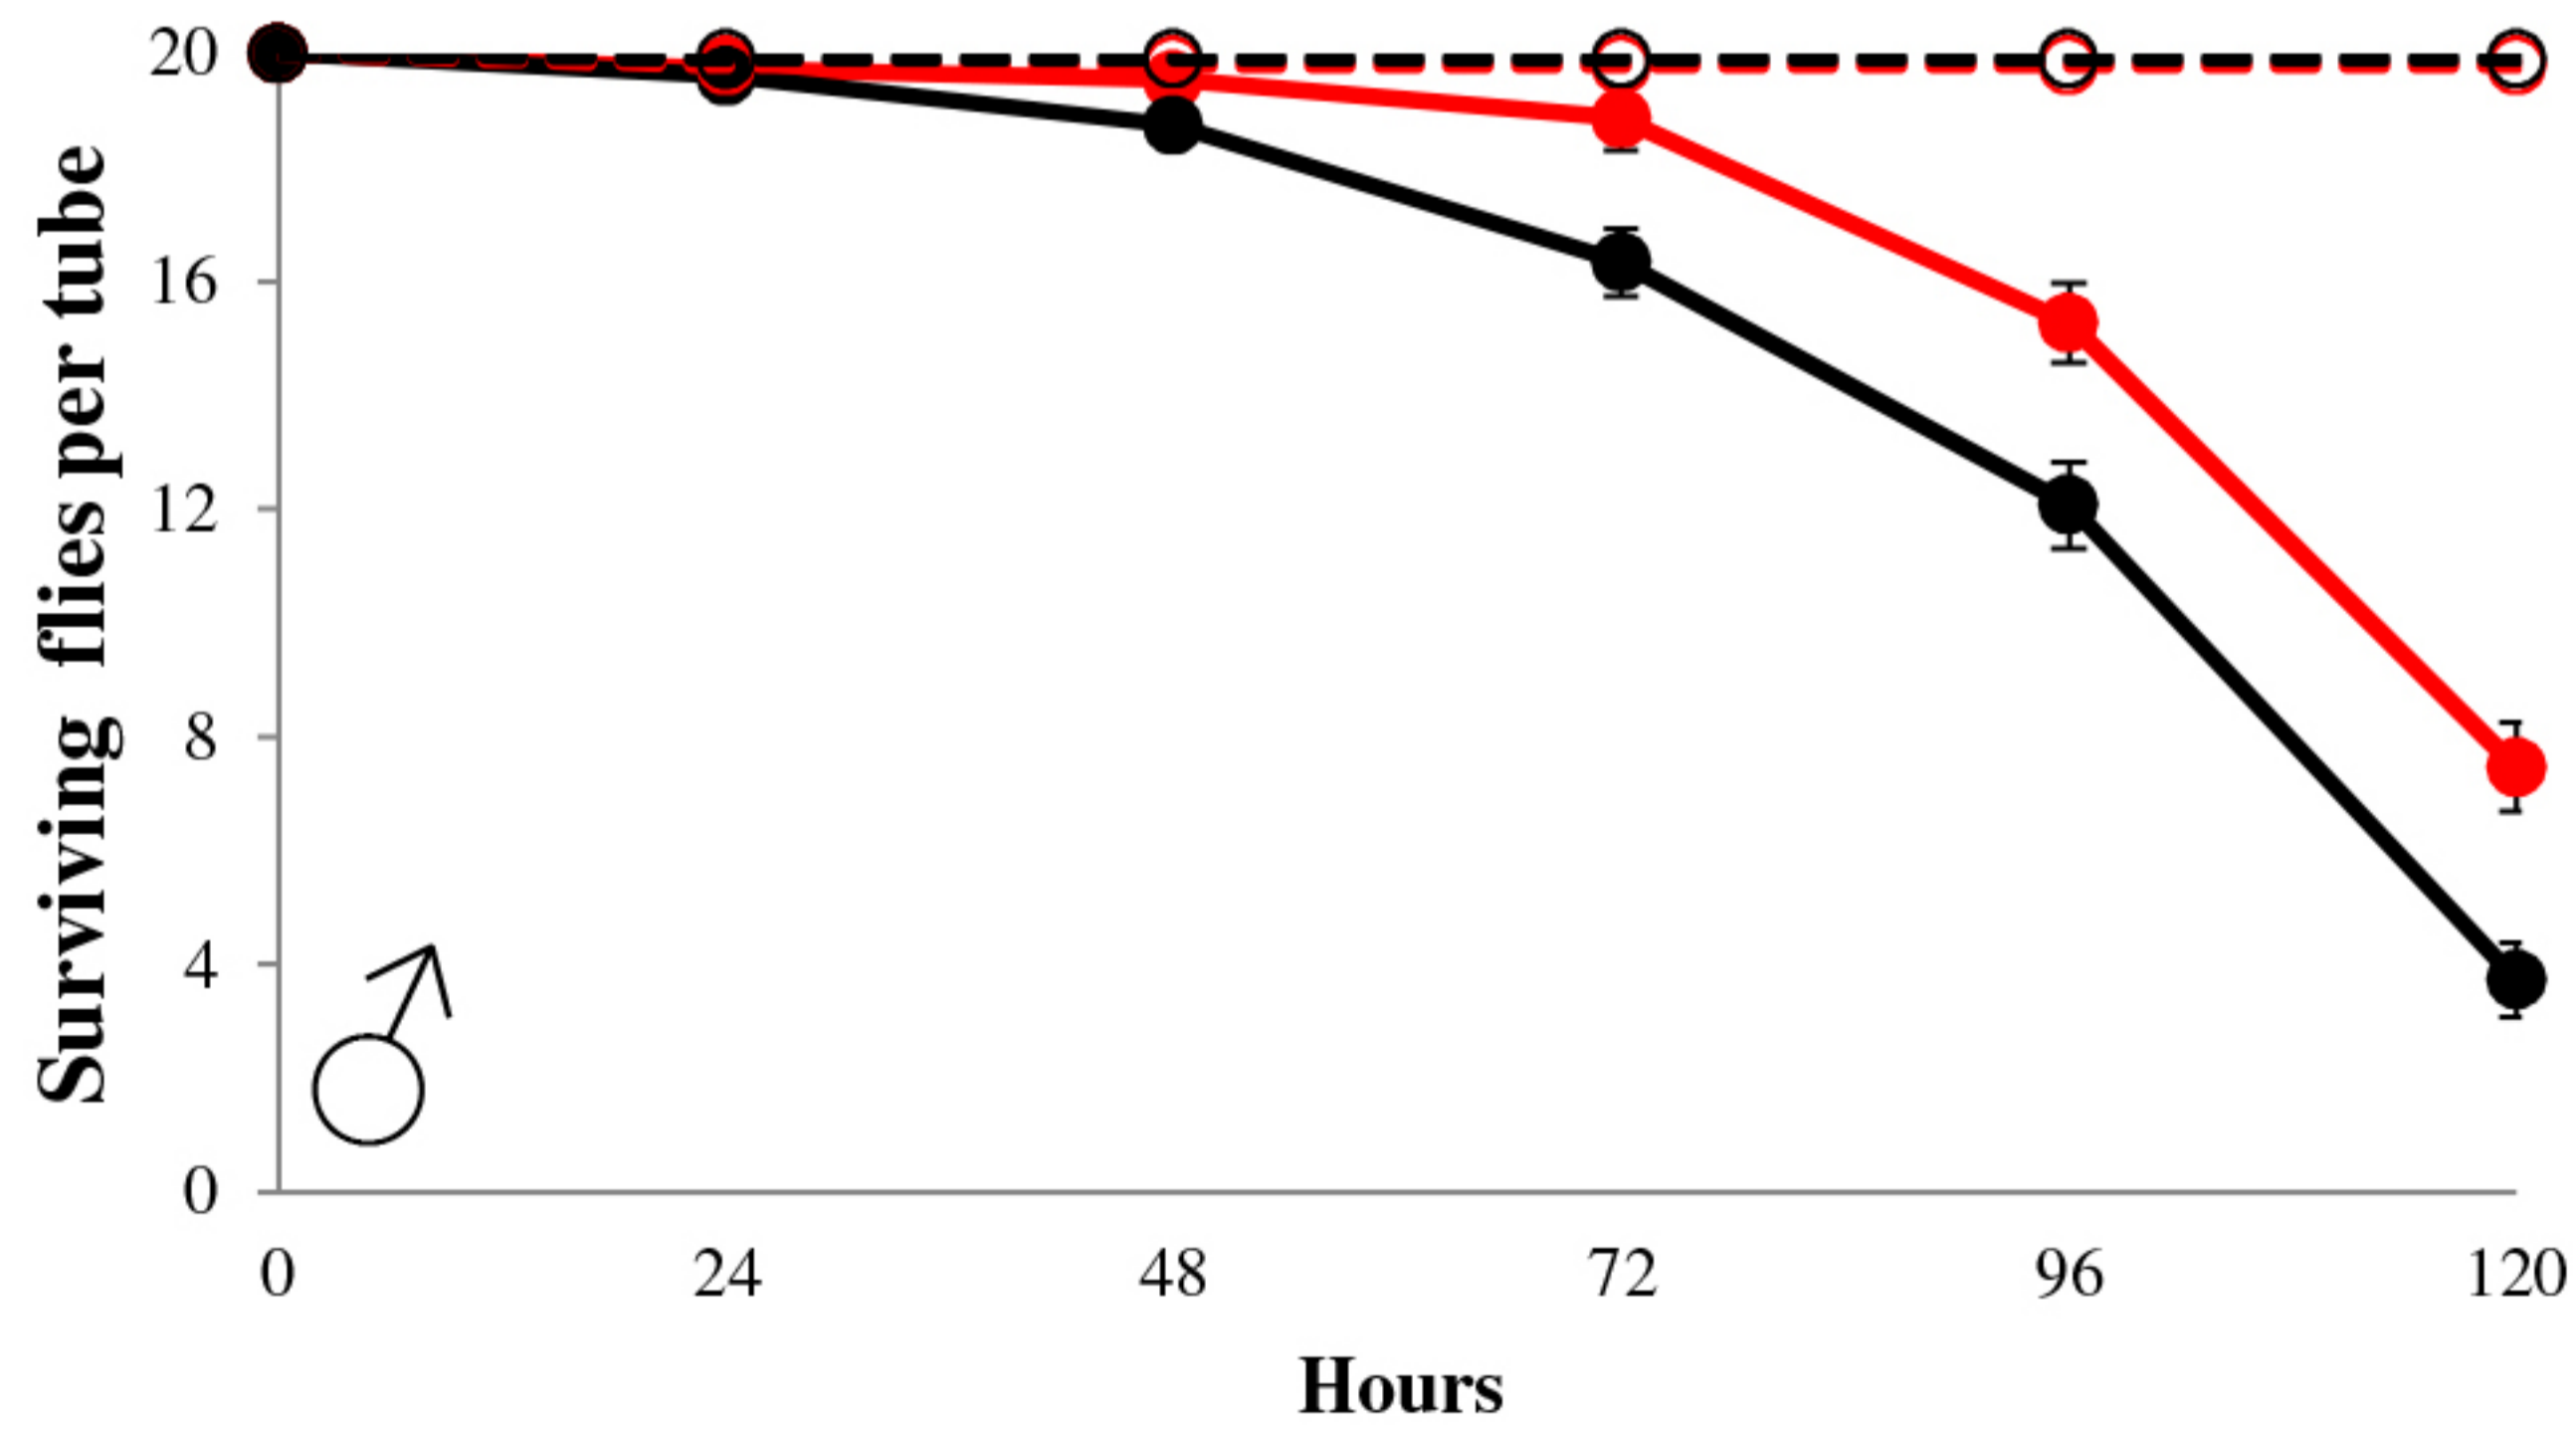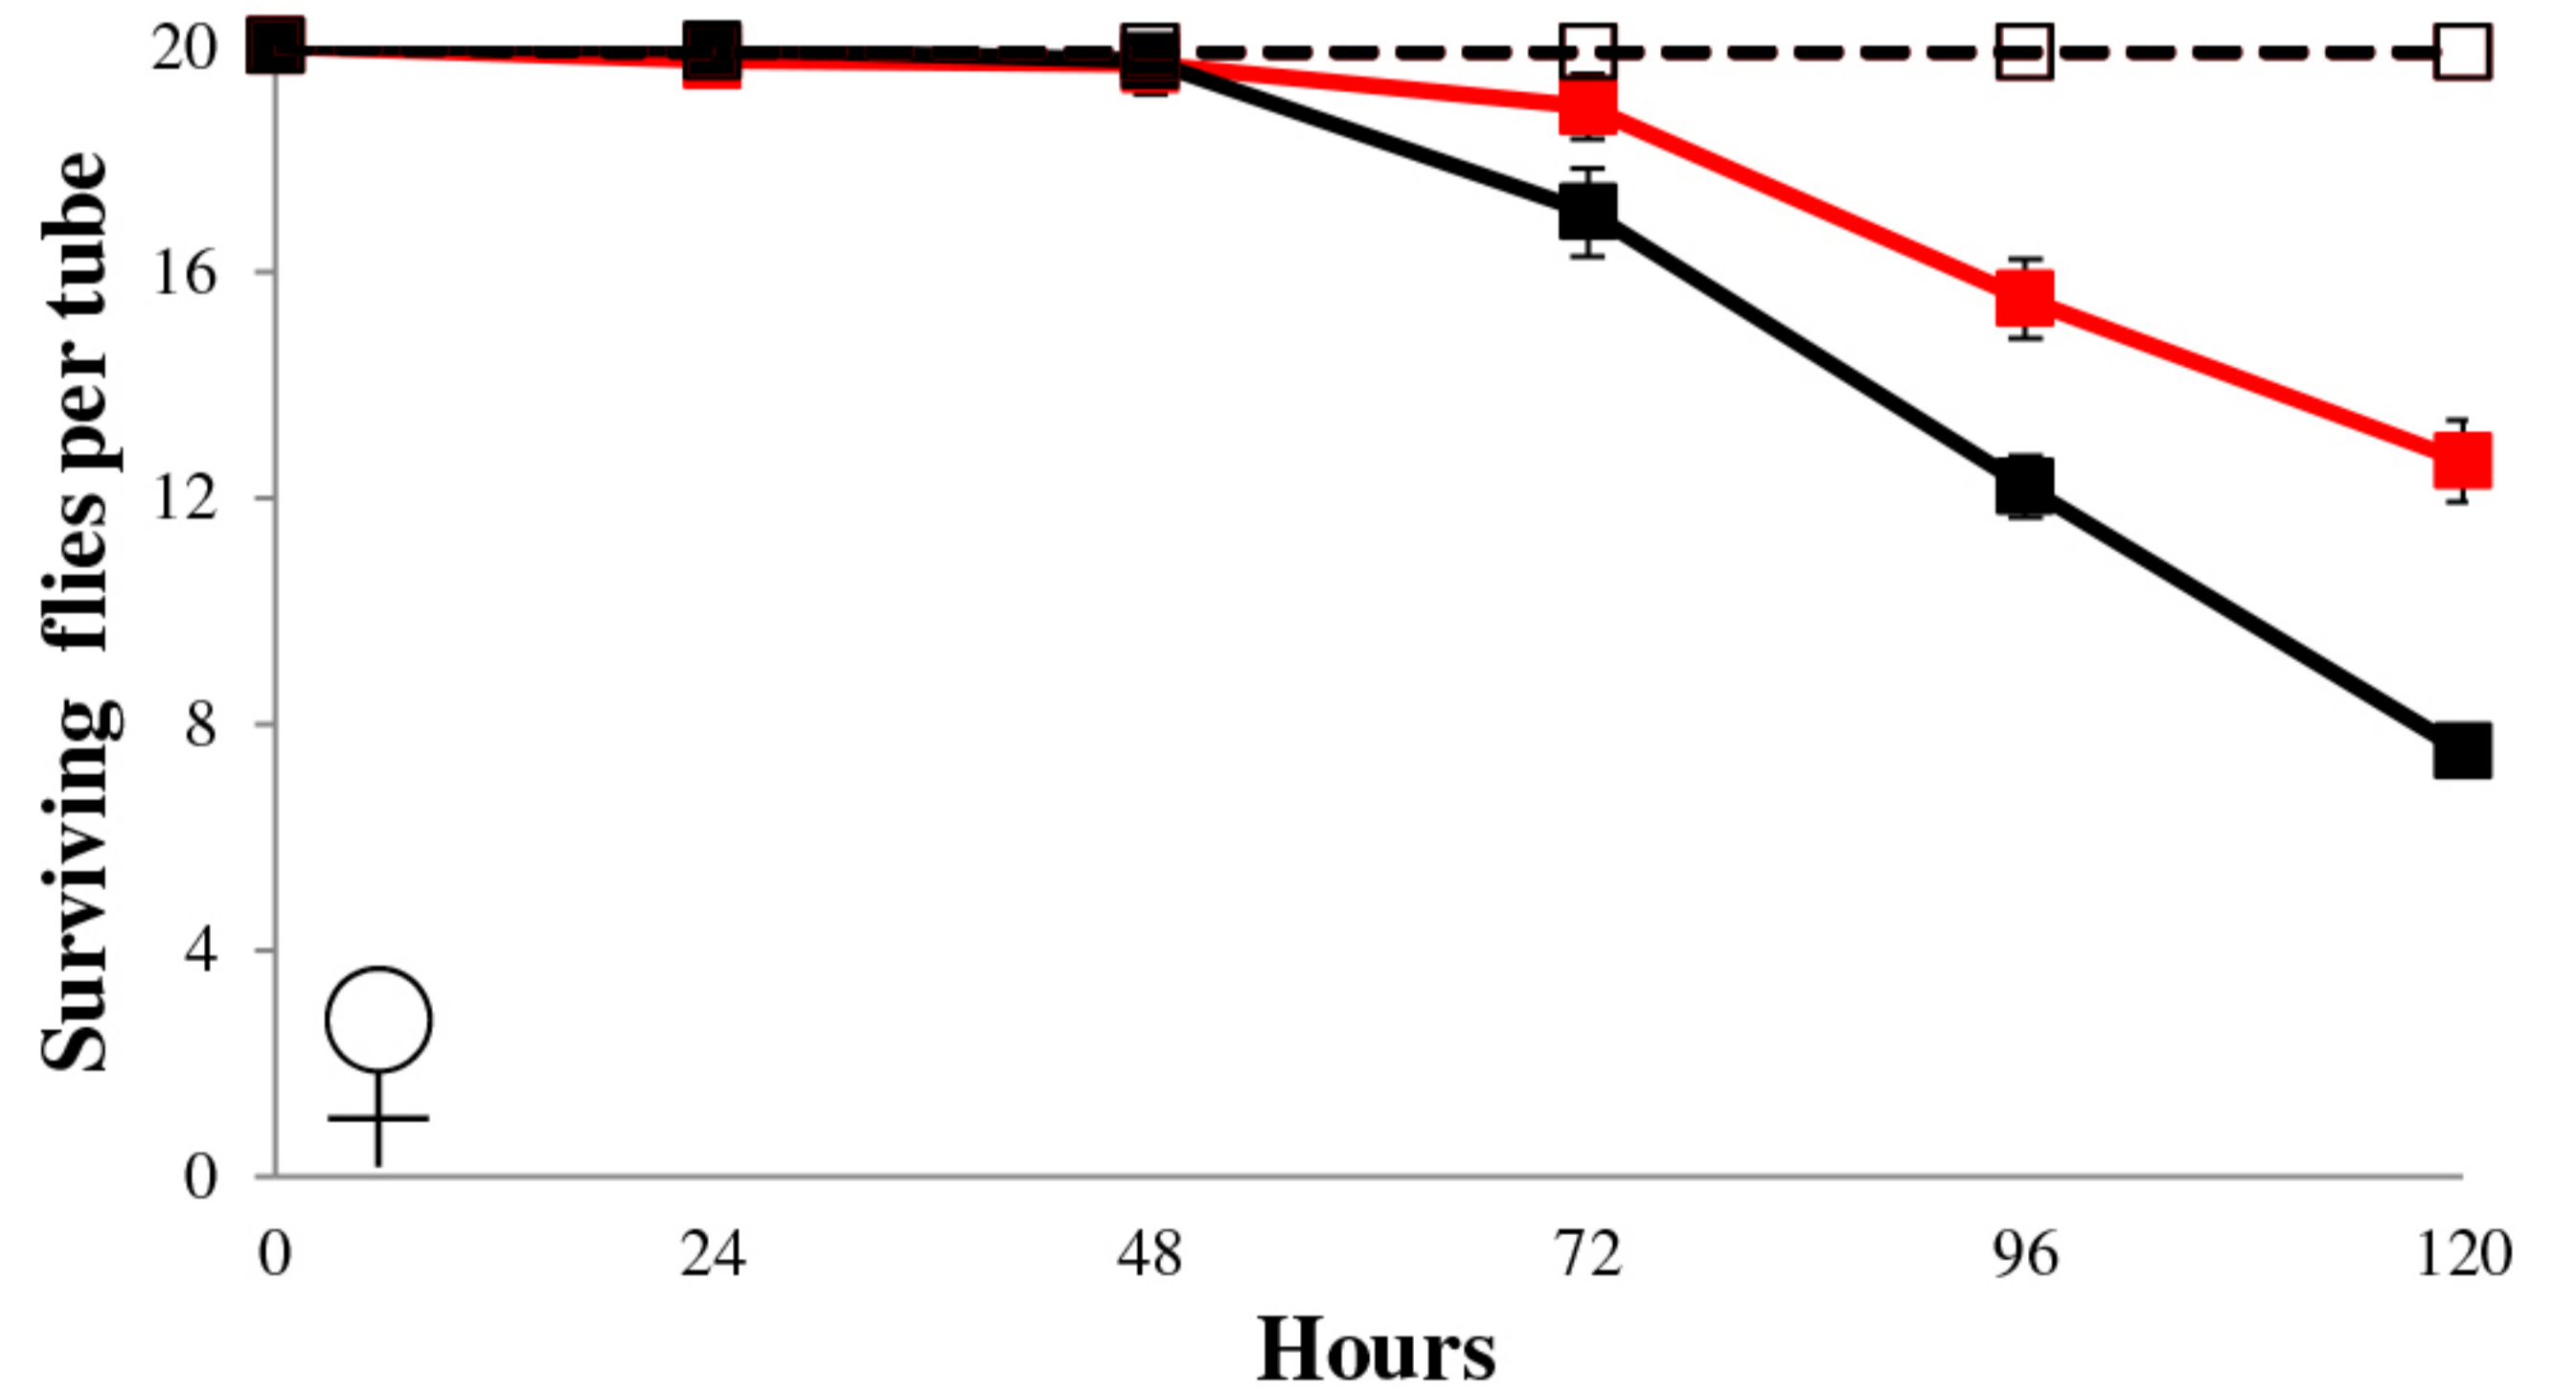

—●— Outbred *FBti0019170* (+) zinc stress  
 -○- Outbred *FBti0019170* (+) nonstress

—●— Outbred *FBti0019170* (-) zinc stress  
 -○- Outbred *FBti0019170* (-) nonstress

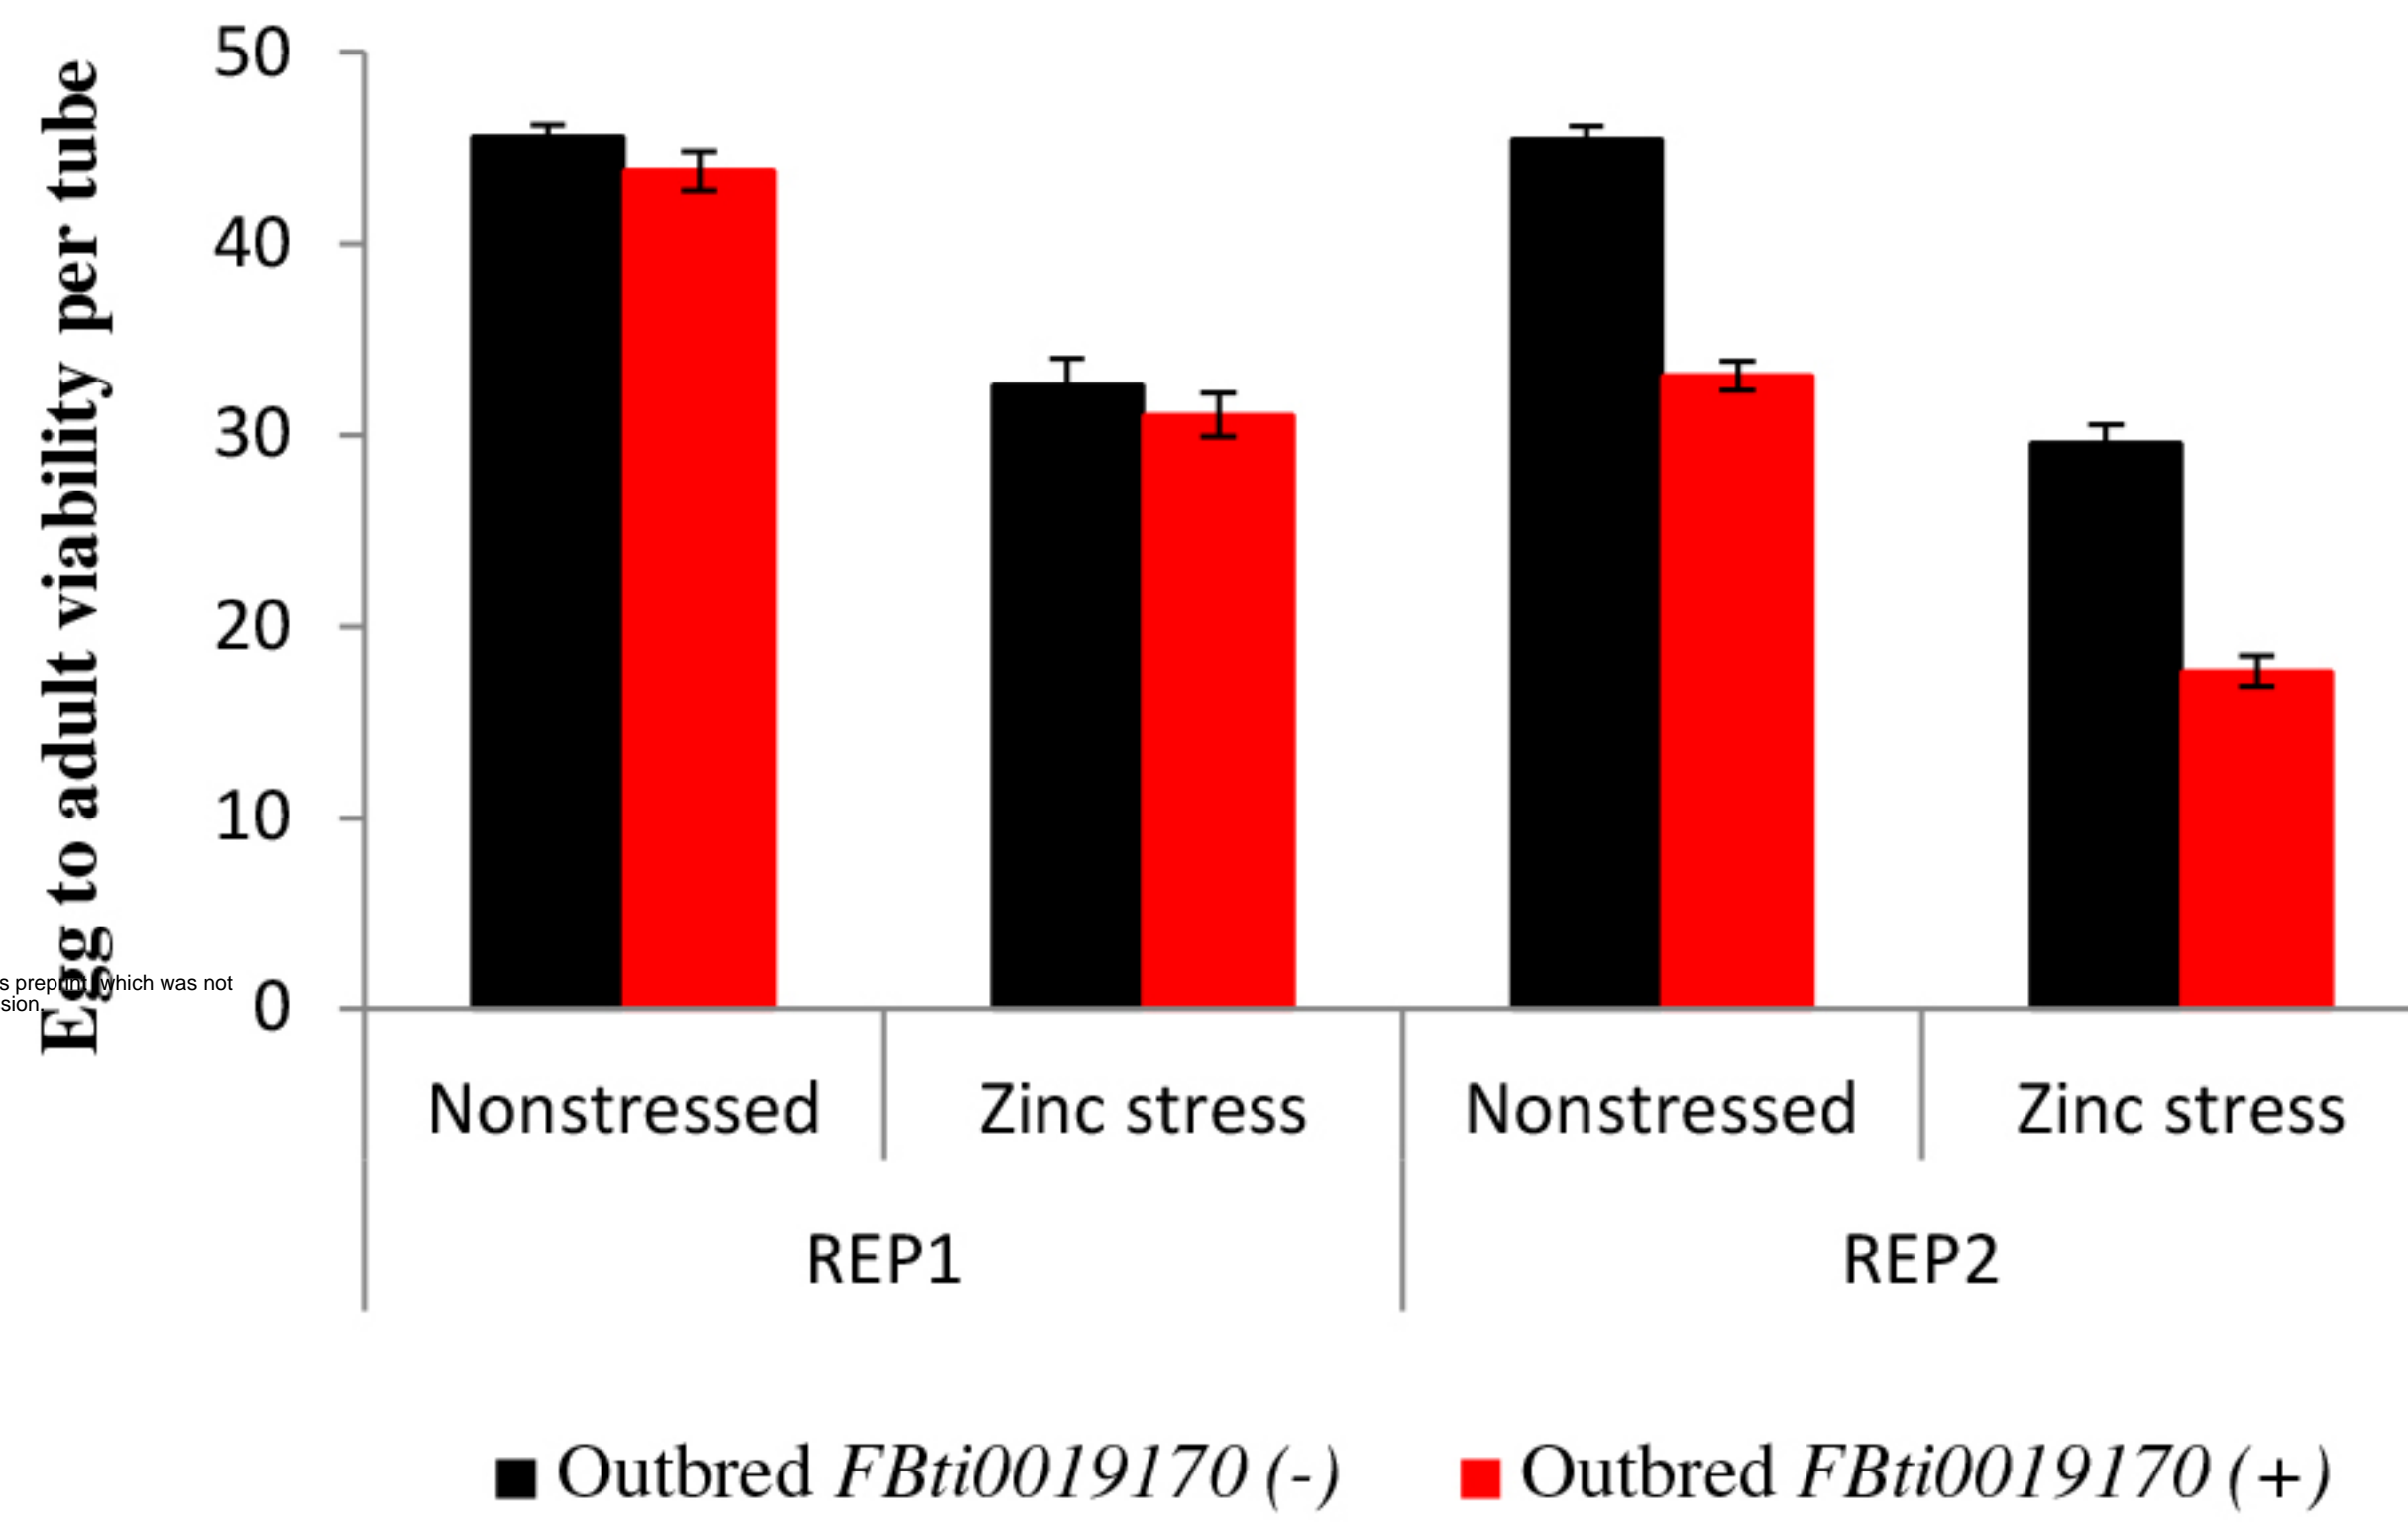

a)

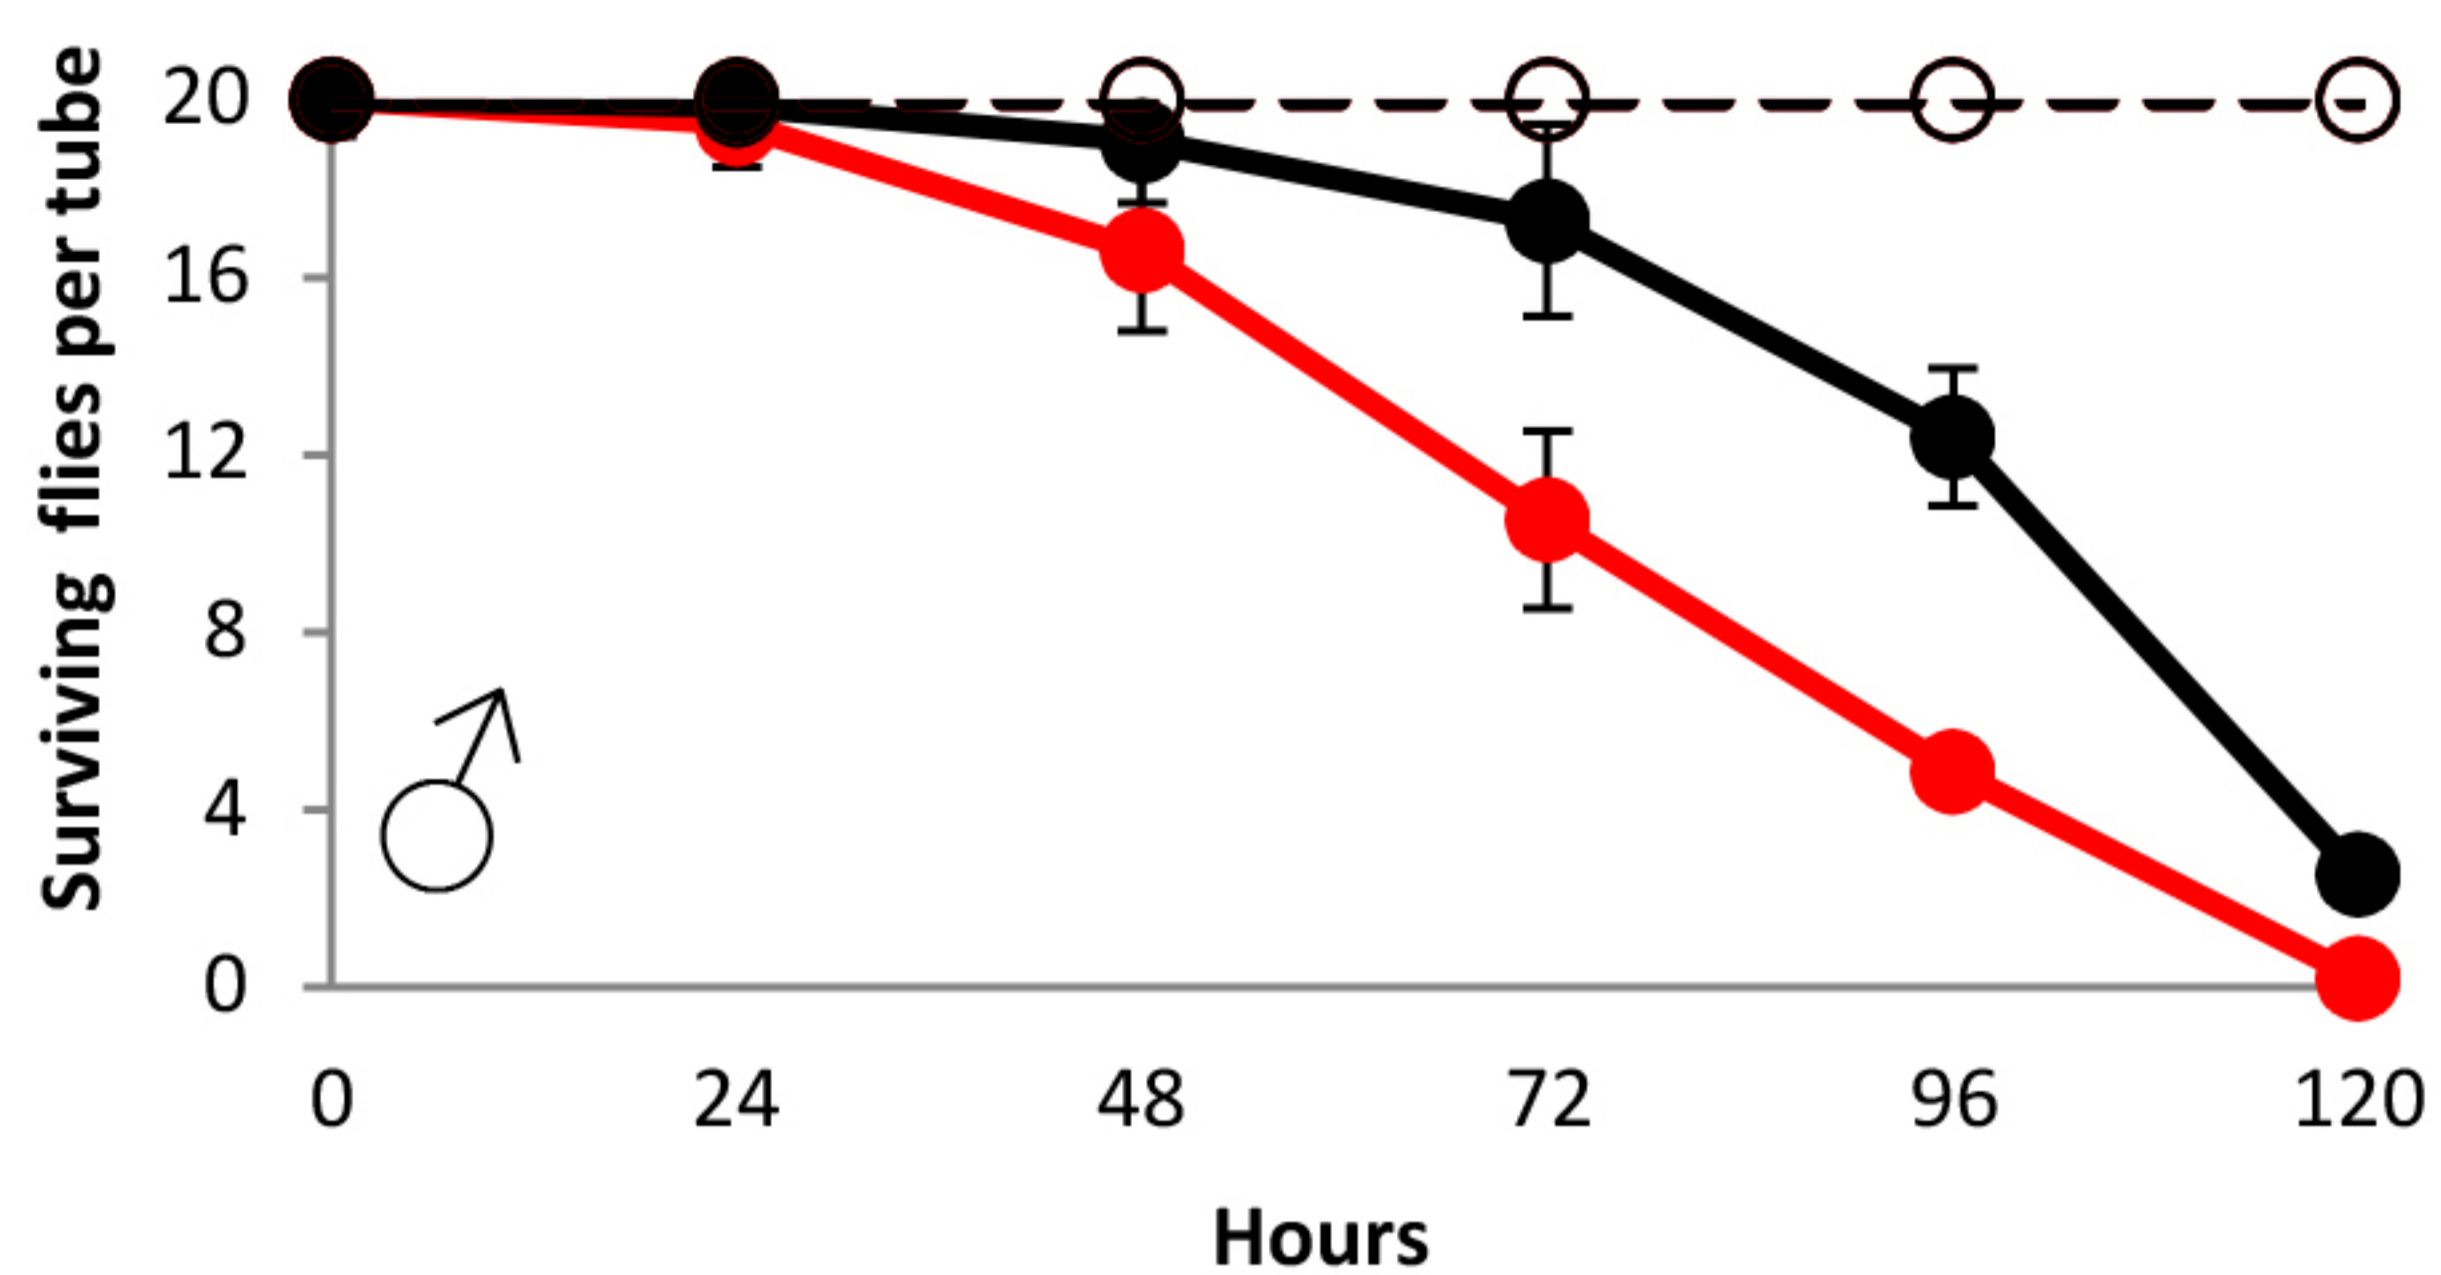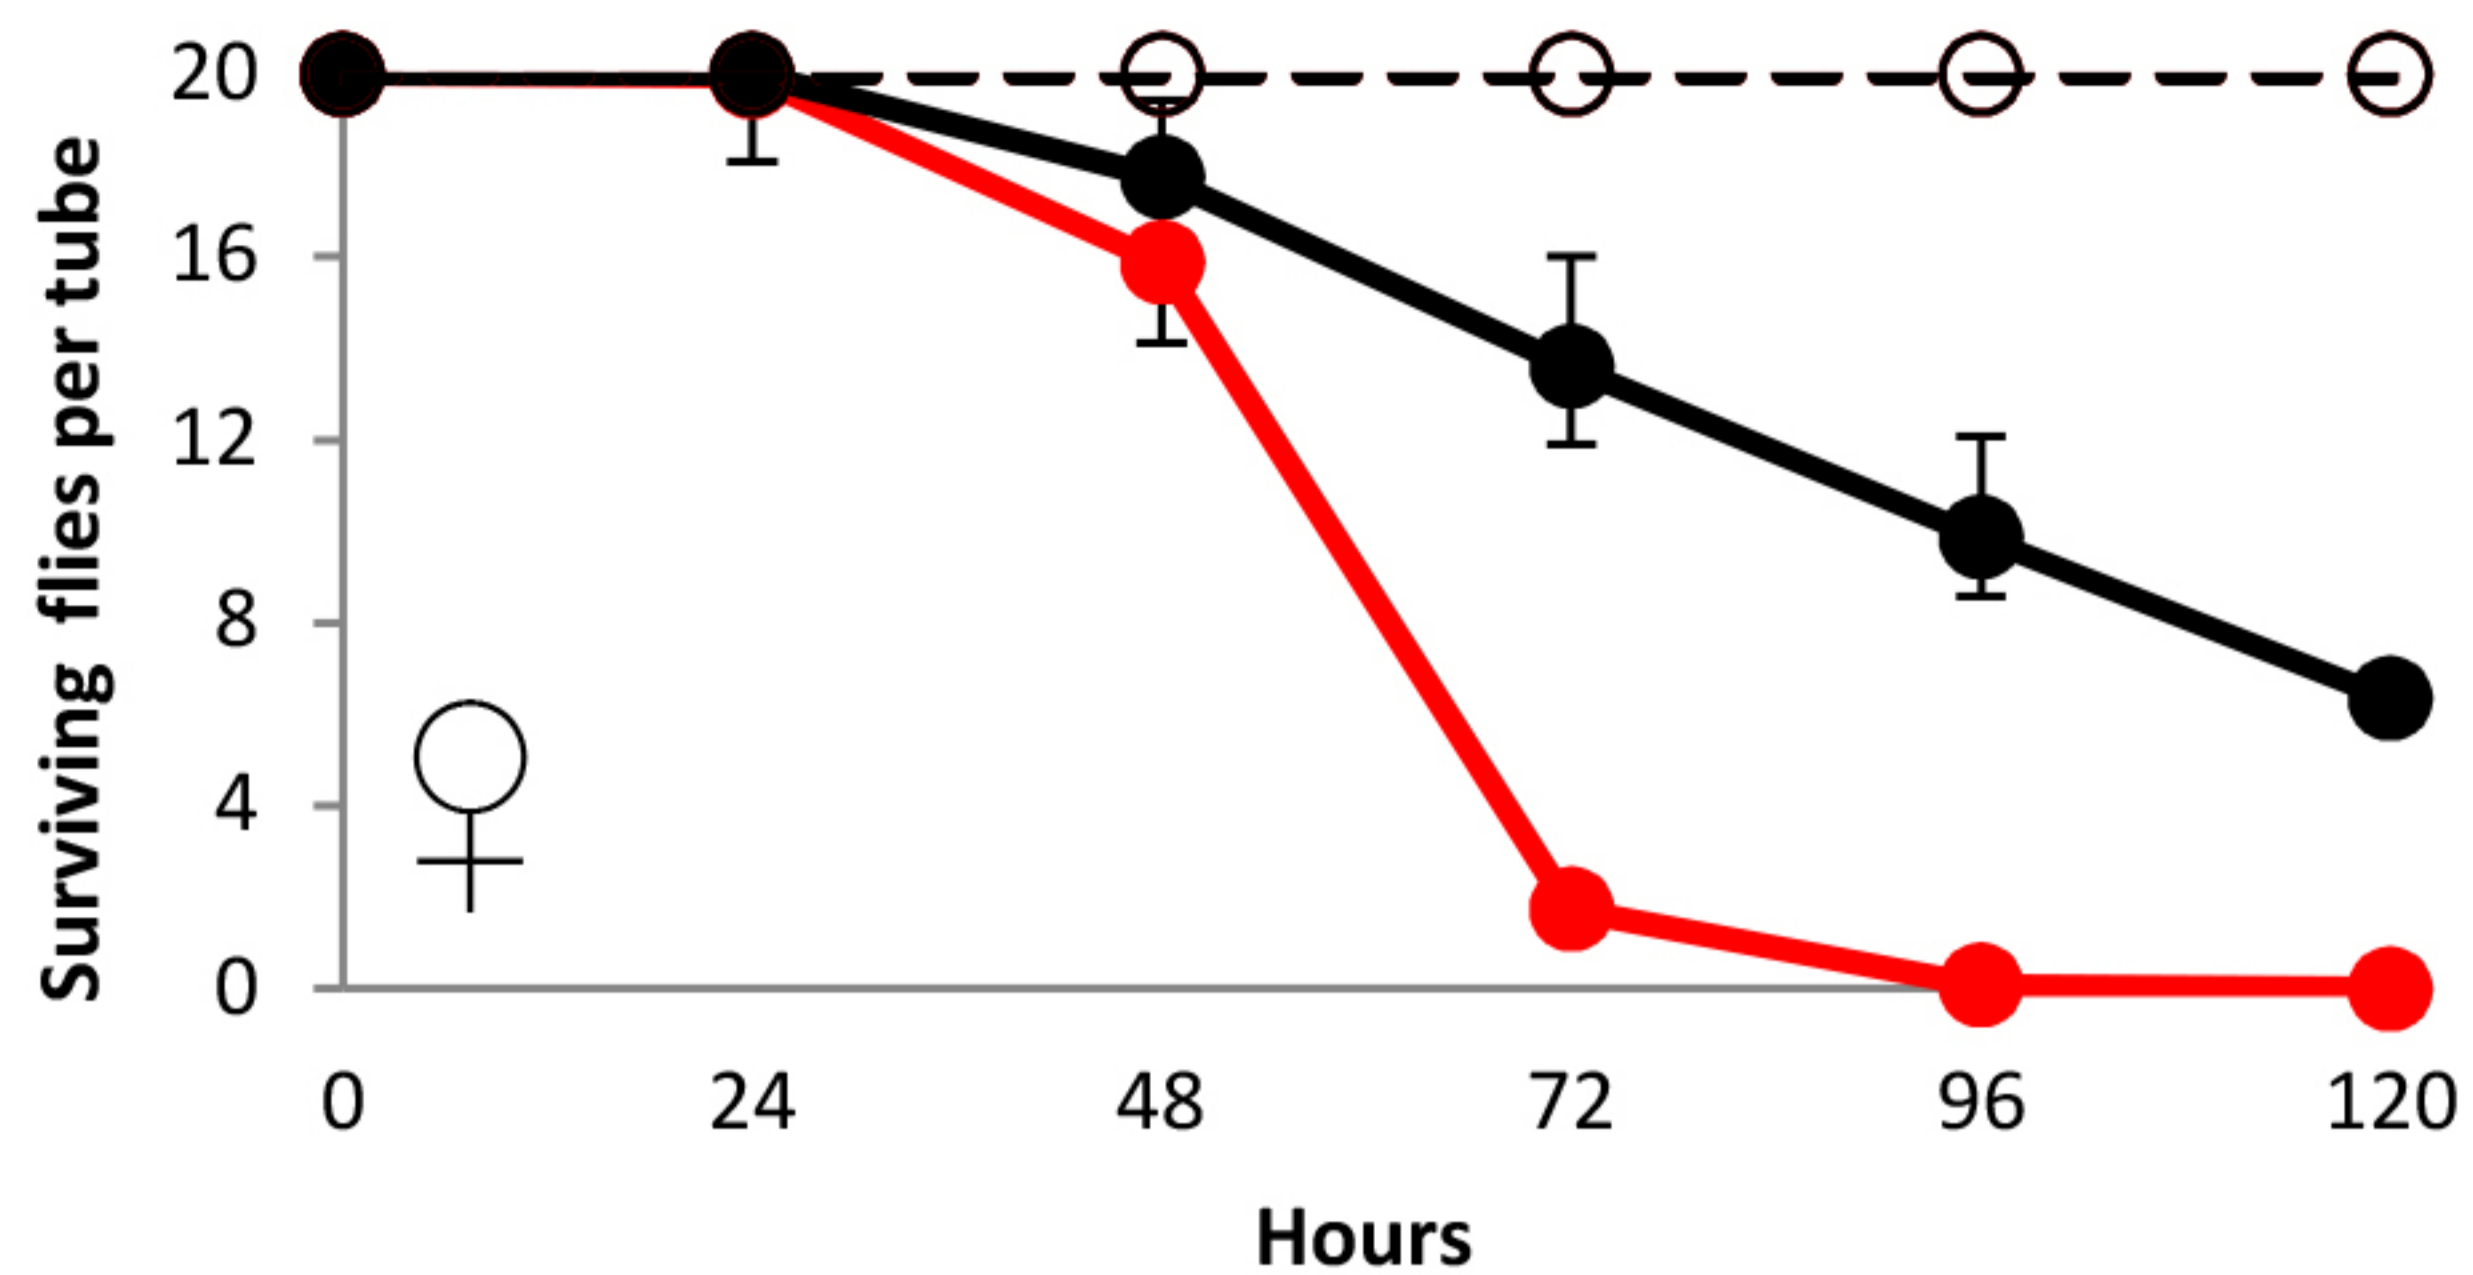

—●— IV22 *FBti0019170* (+) Zinc stress  
 - -○- IV22 *FBti0019170* (+) Nonstress

—●— B47 *FBti0019170* (-) Zinc stress  
 - -○- B47 *FBti0019170* (-) Nonstress

b)

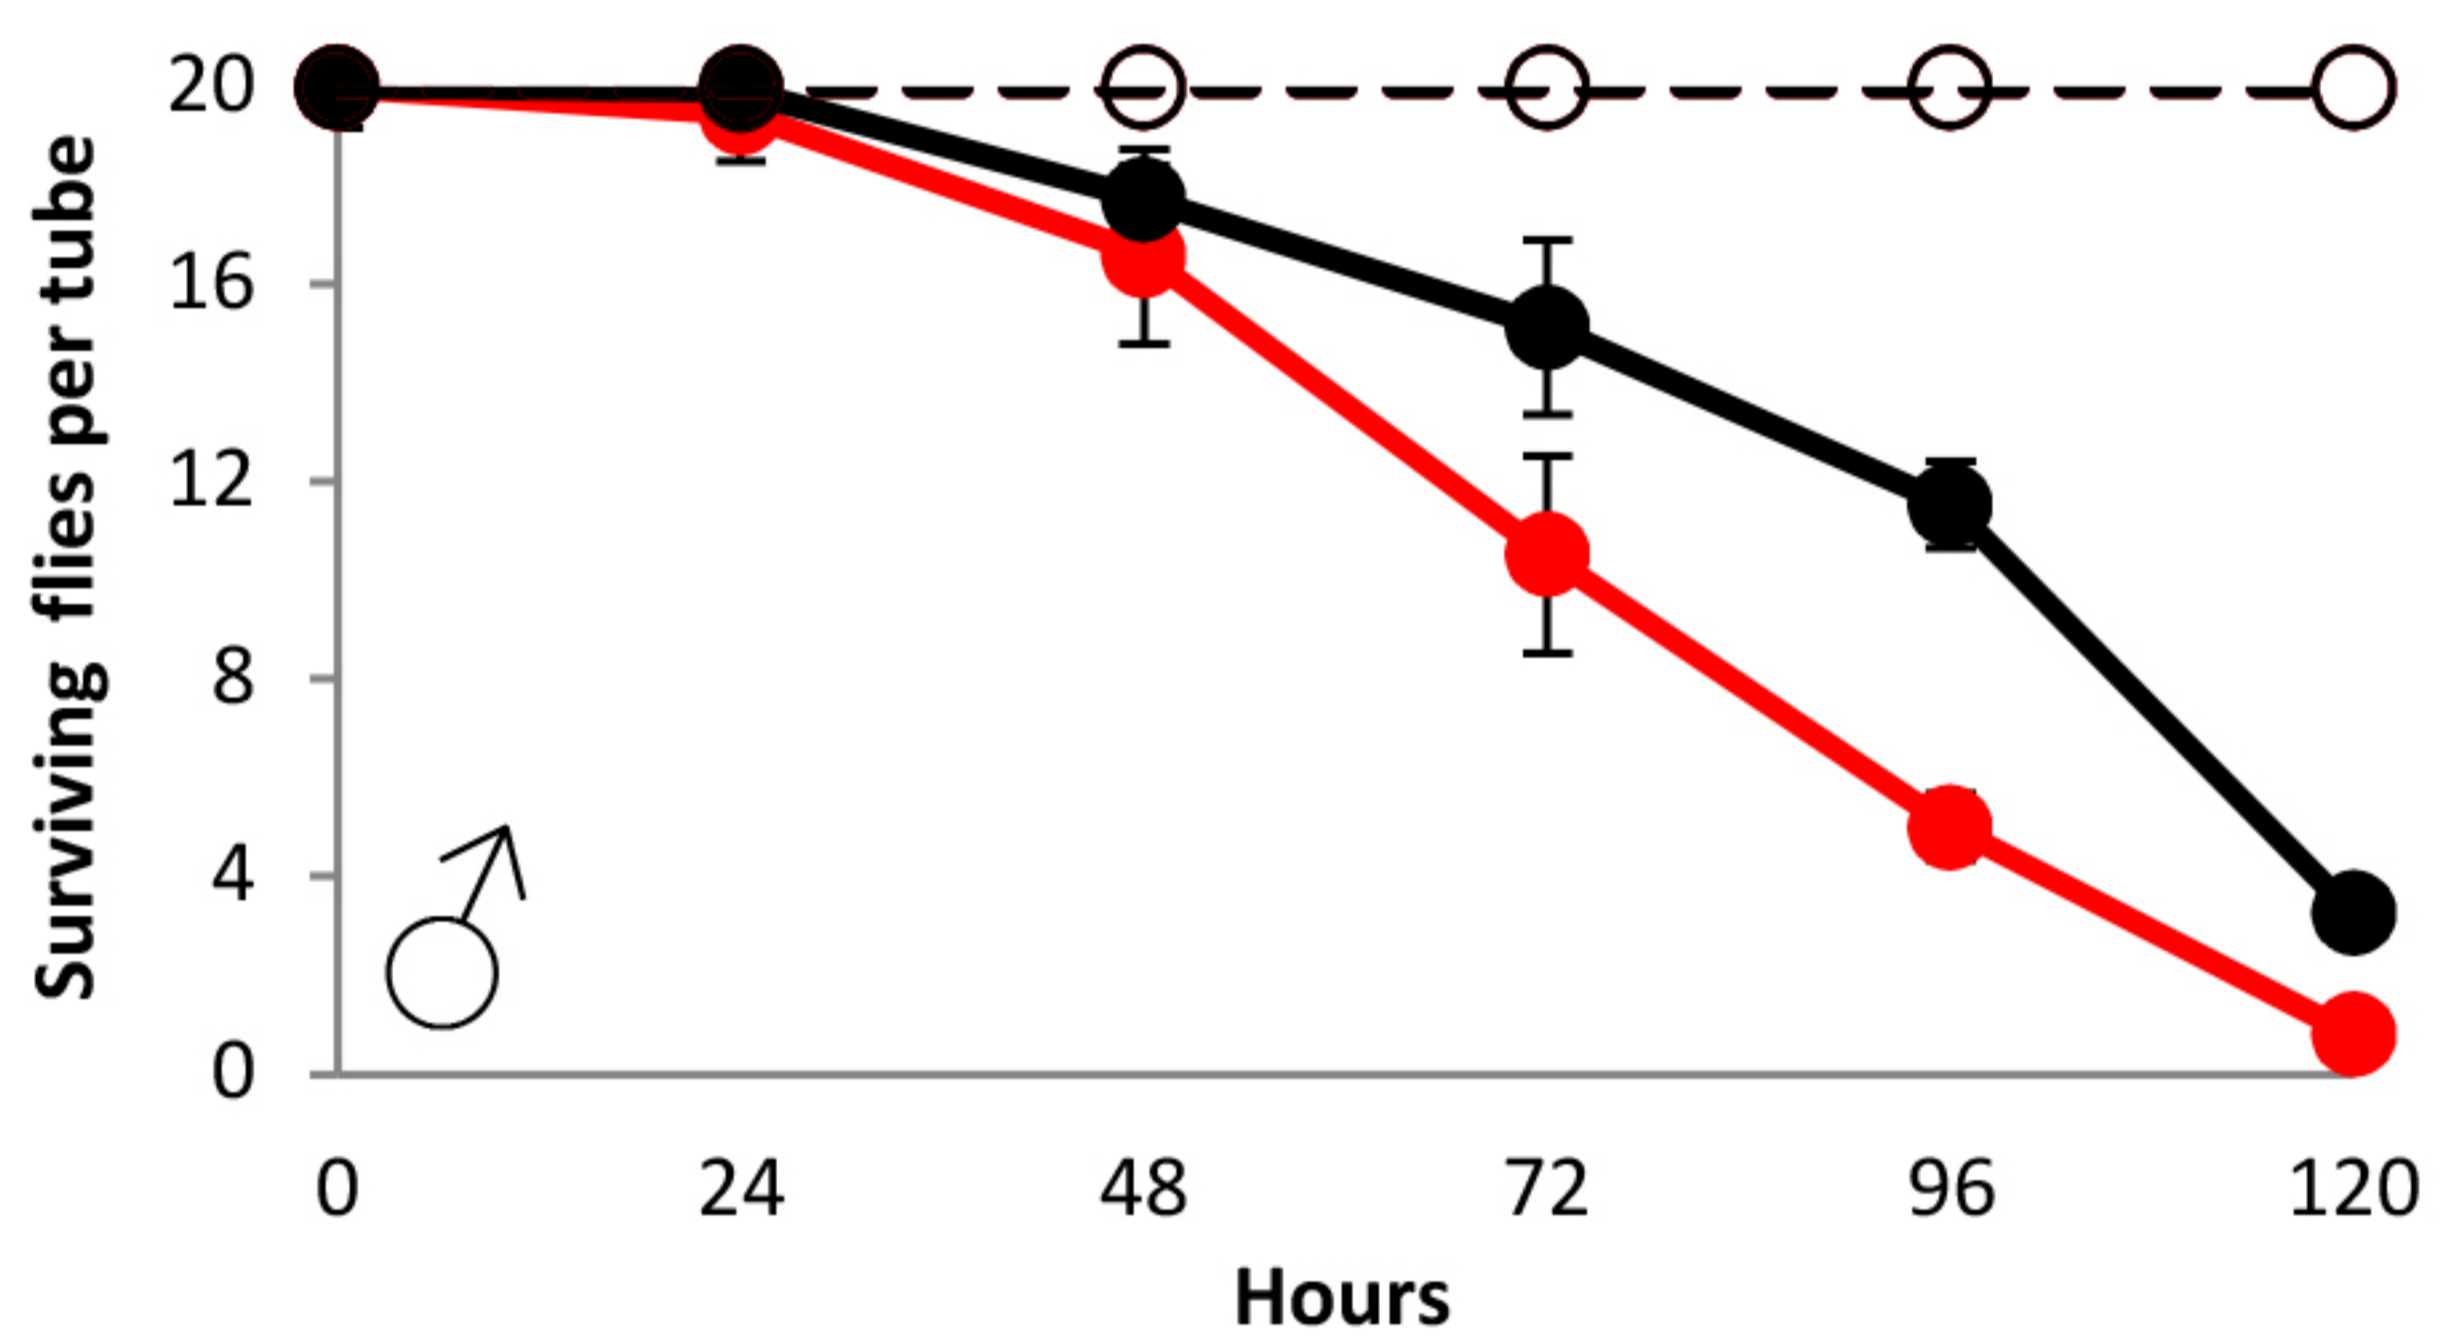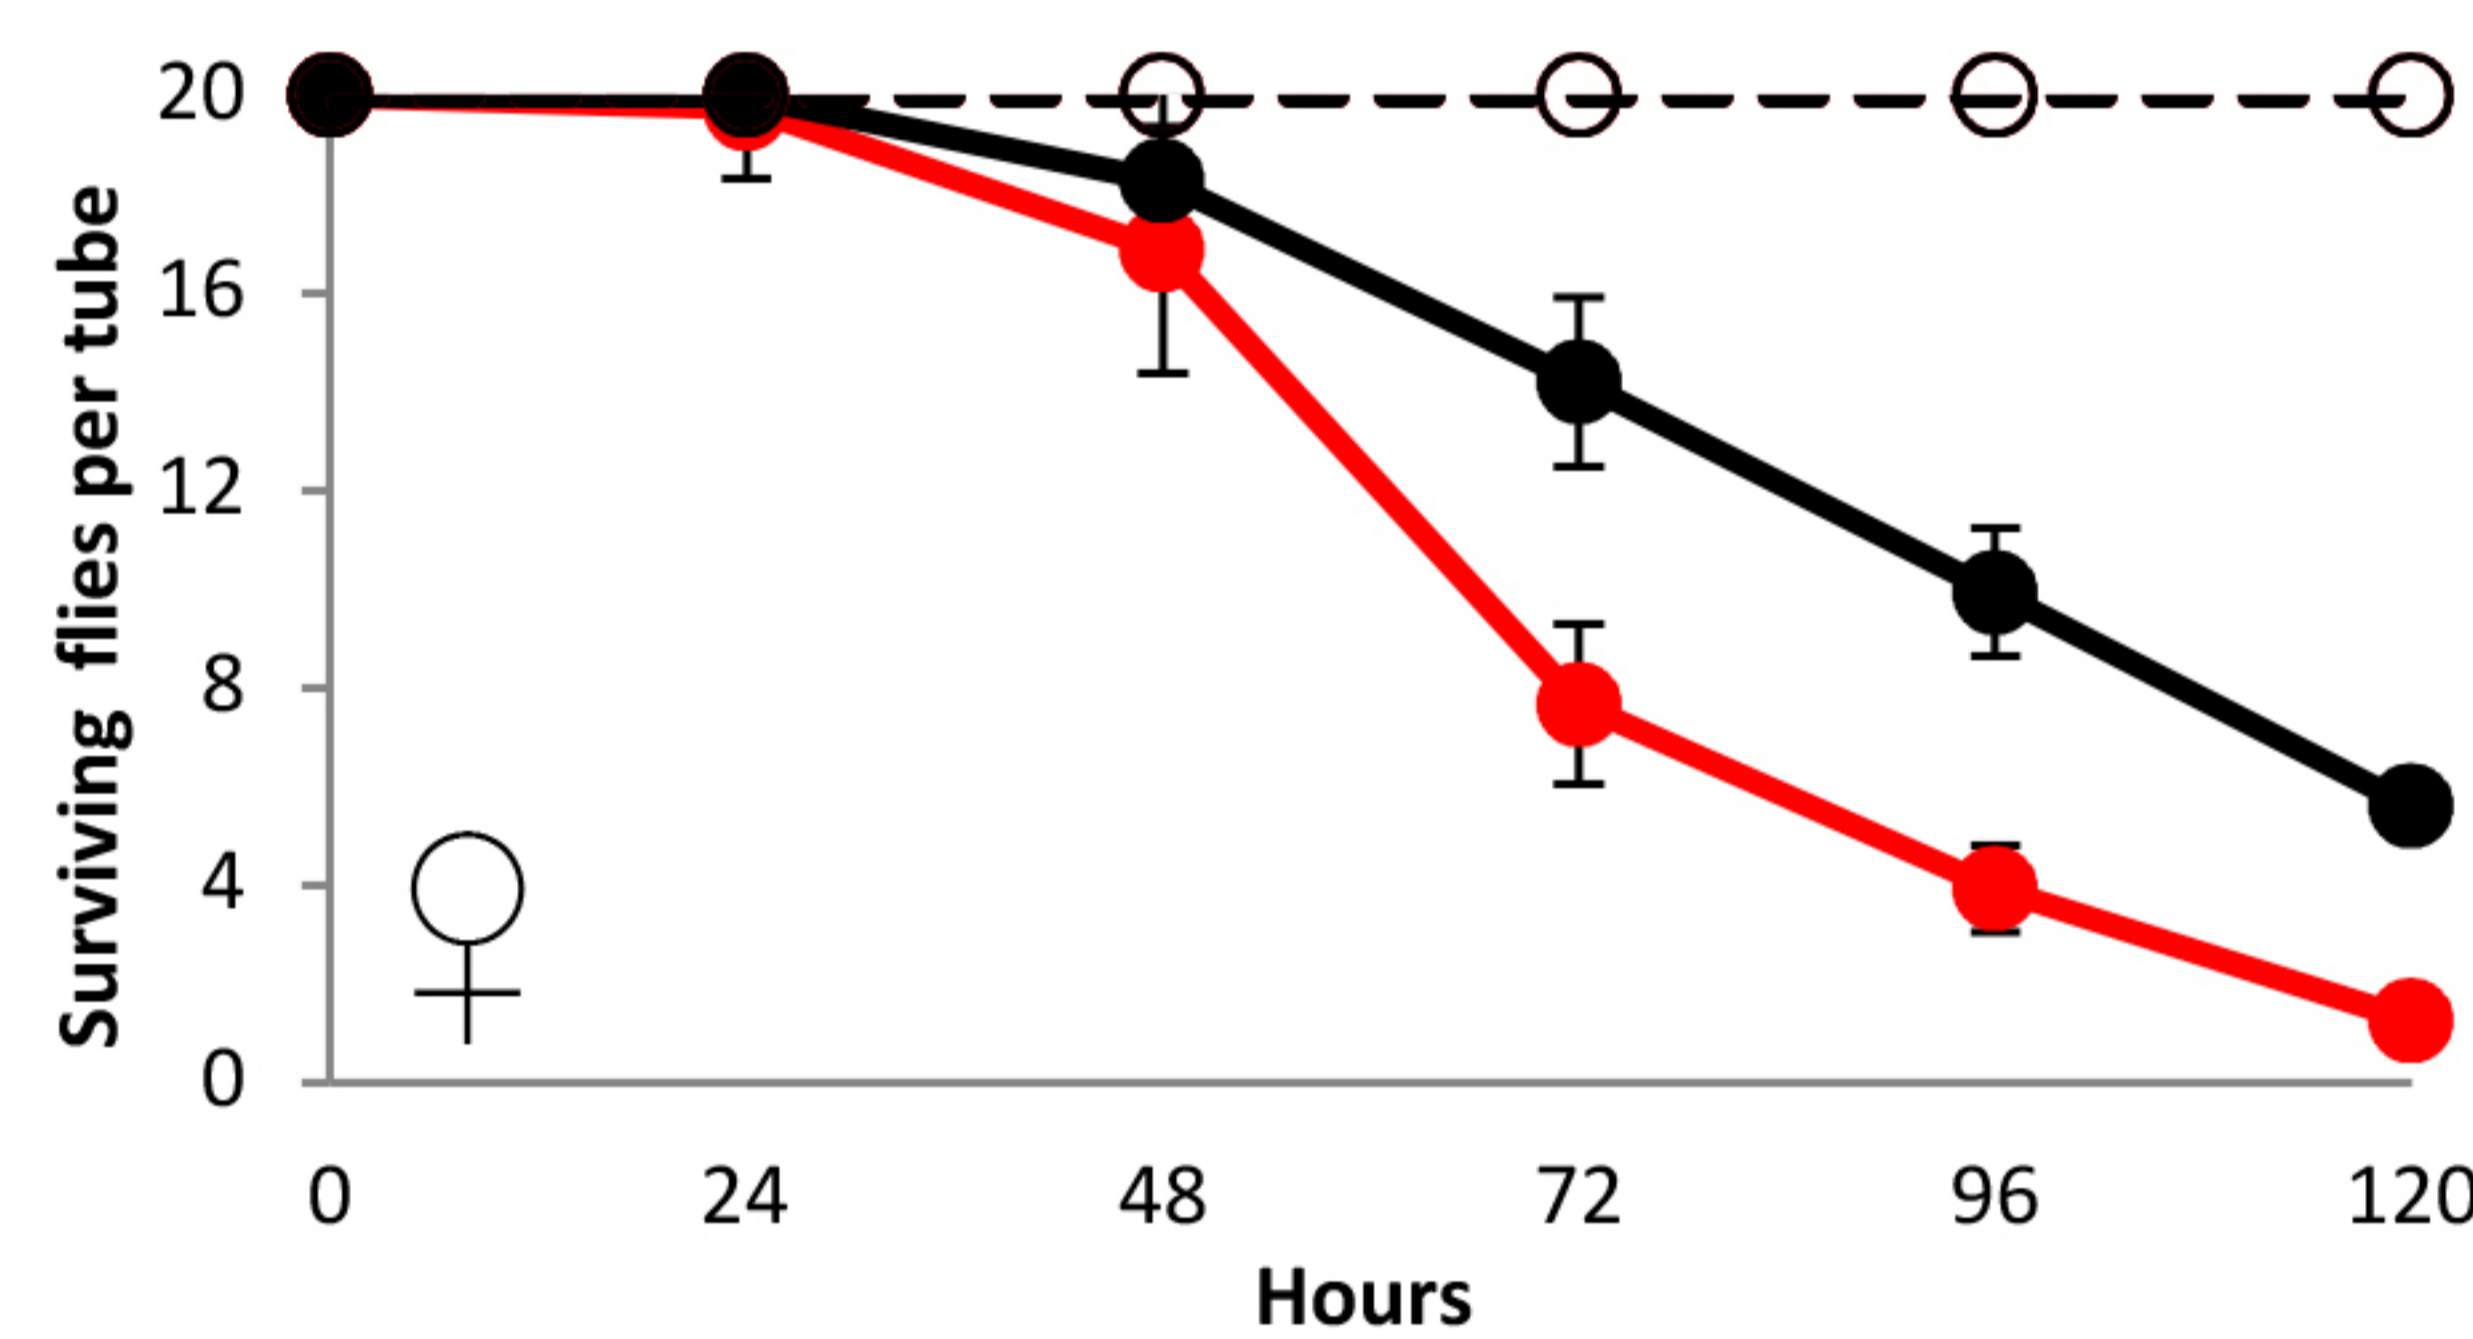

—●— IV22 *FBti0019170* (+) Zinc stress  
 - -○- IV22 *FBti0019170* (+) Nonstress

—●— B47 *FBti0019170* (-) Zinc stress  
 - -○- B47 *FBti0019170* (-) Nonstress

c)

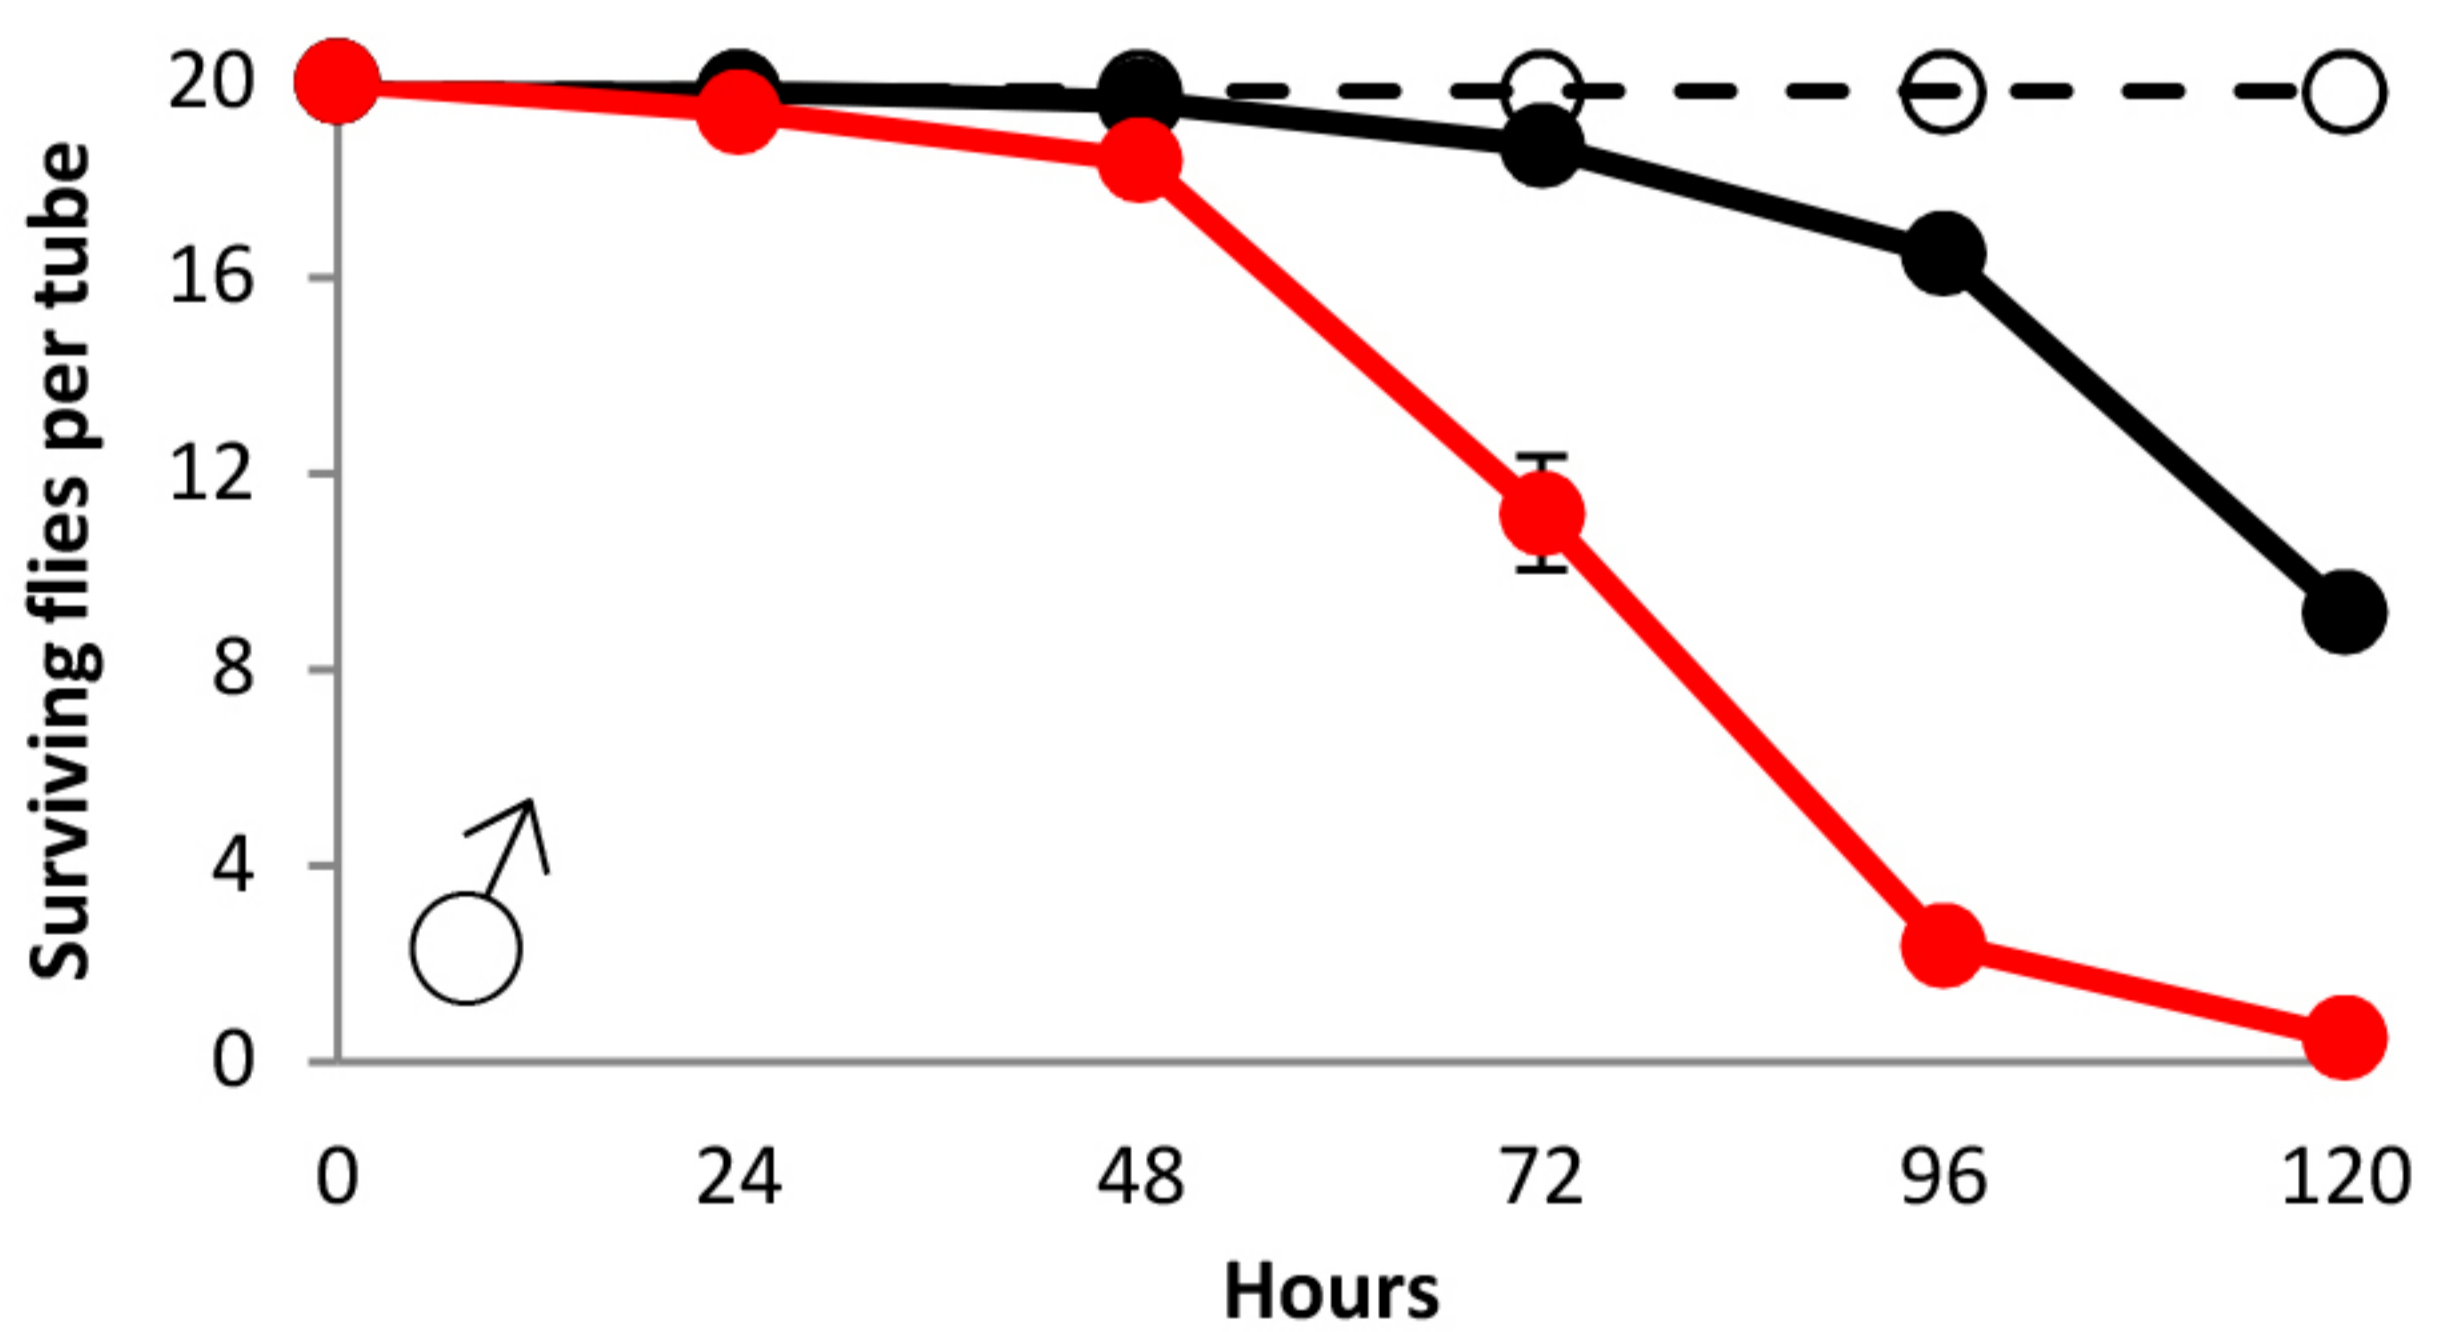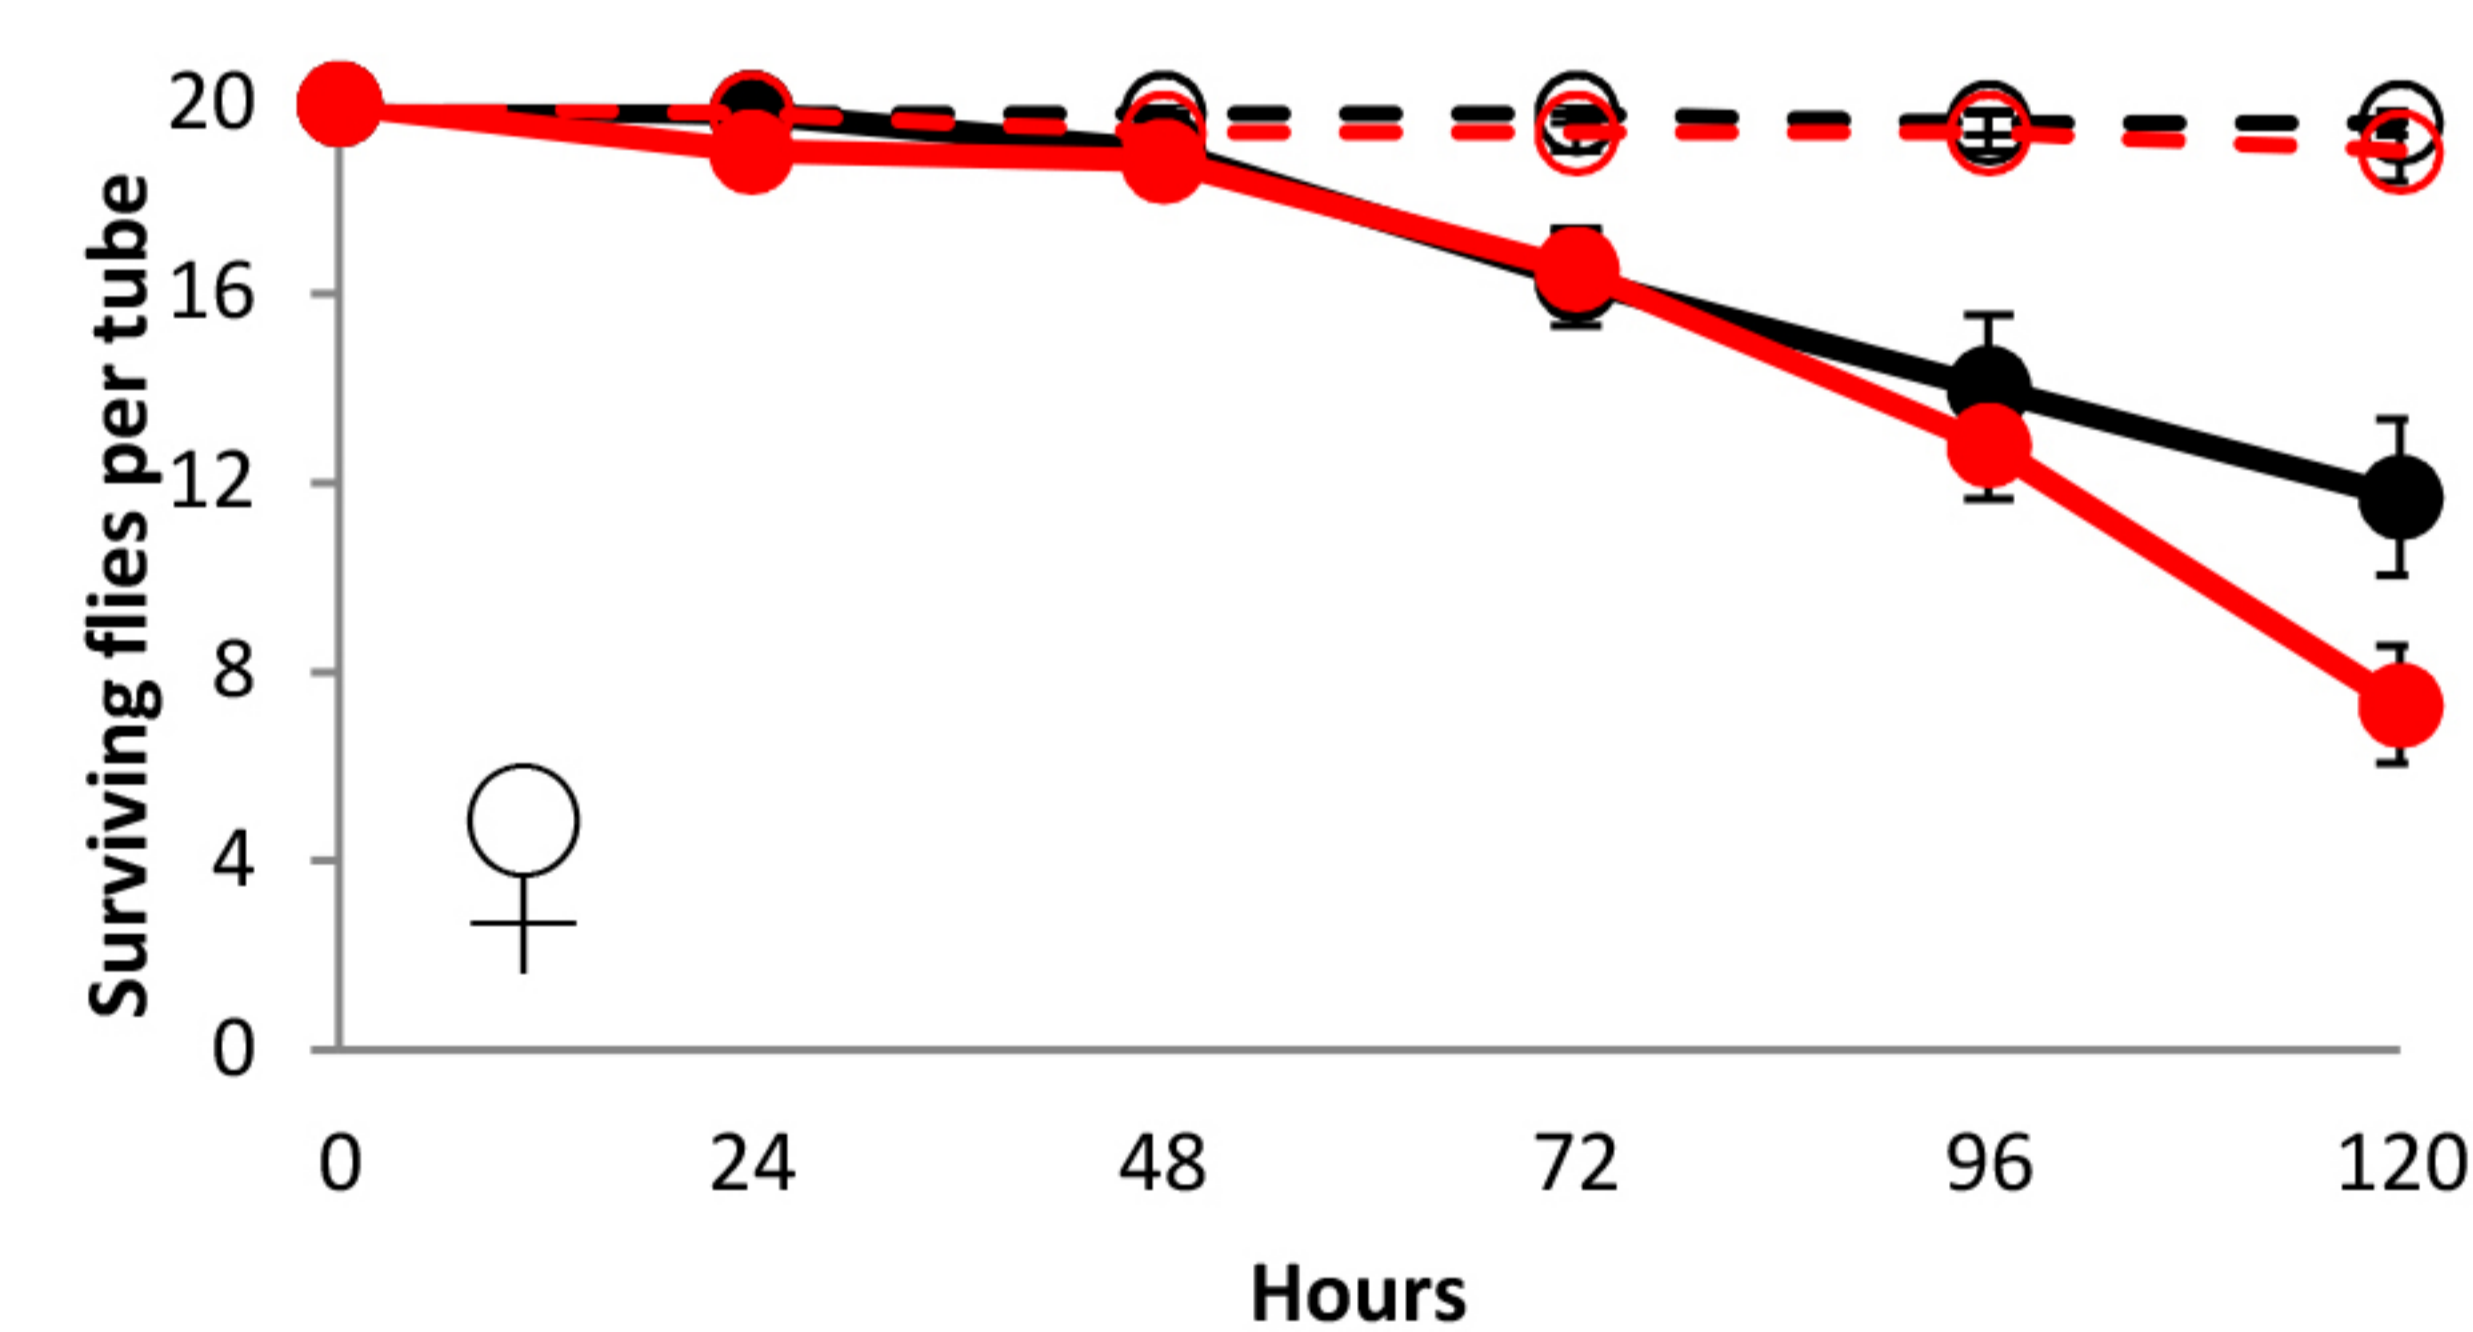

—●— IV145 *FBti0019170* (+) Zinc stress  
 - -○- IV145 *FBti0019170* (+) Nonstress

—●— B47 *FBti0019170* (-) Zinc stress  
 - -○- B47 *FBti0019170* (-) Nonstress

bioRxiv preprint doi: <https://doi.org/10.1101/070243>; this version posted August 18, 2016. The copyright holder for this preprint (which was not certified by peer review) is the author/funder. All rights reserved. No reuse allowed without permission.

d)

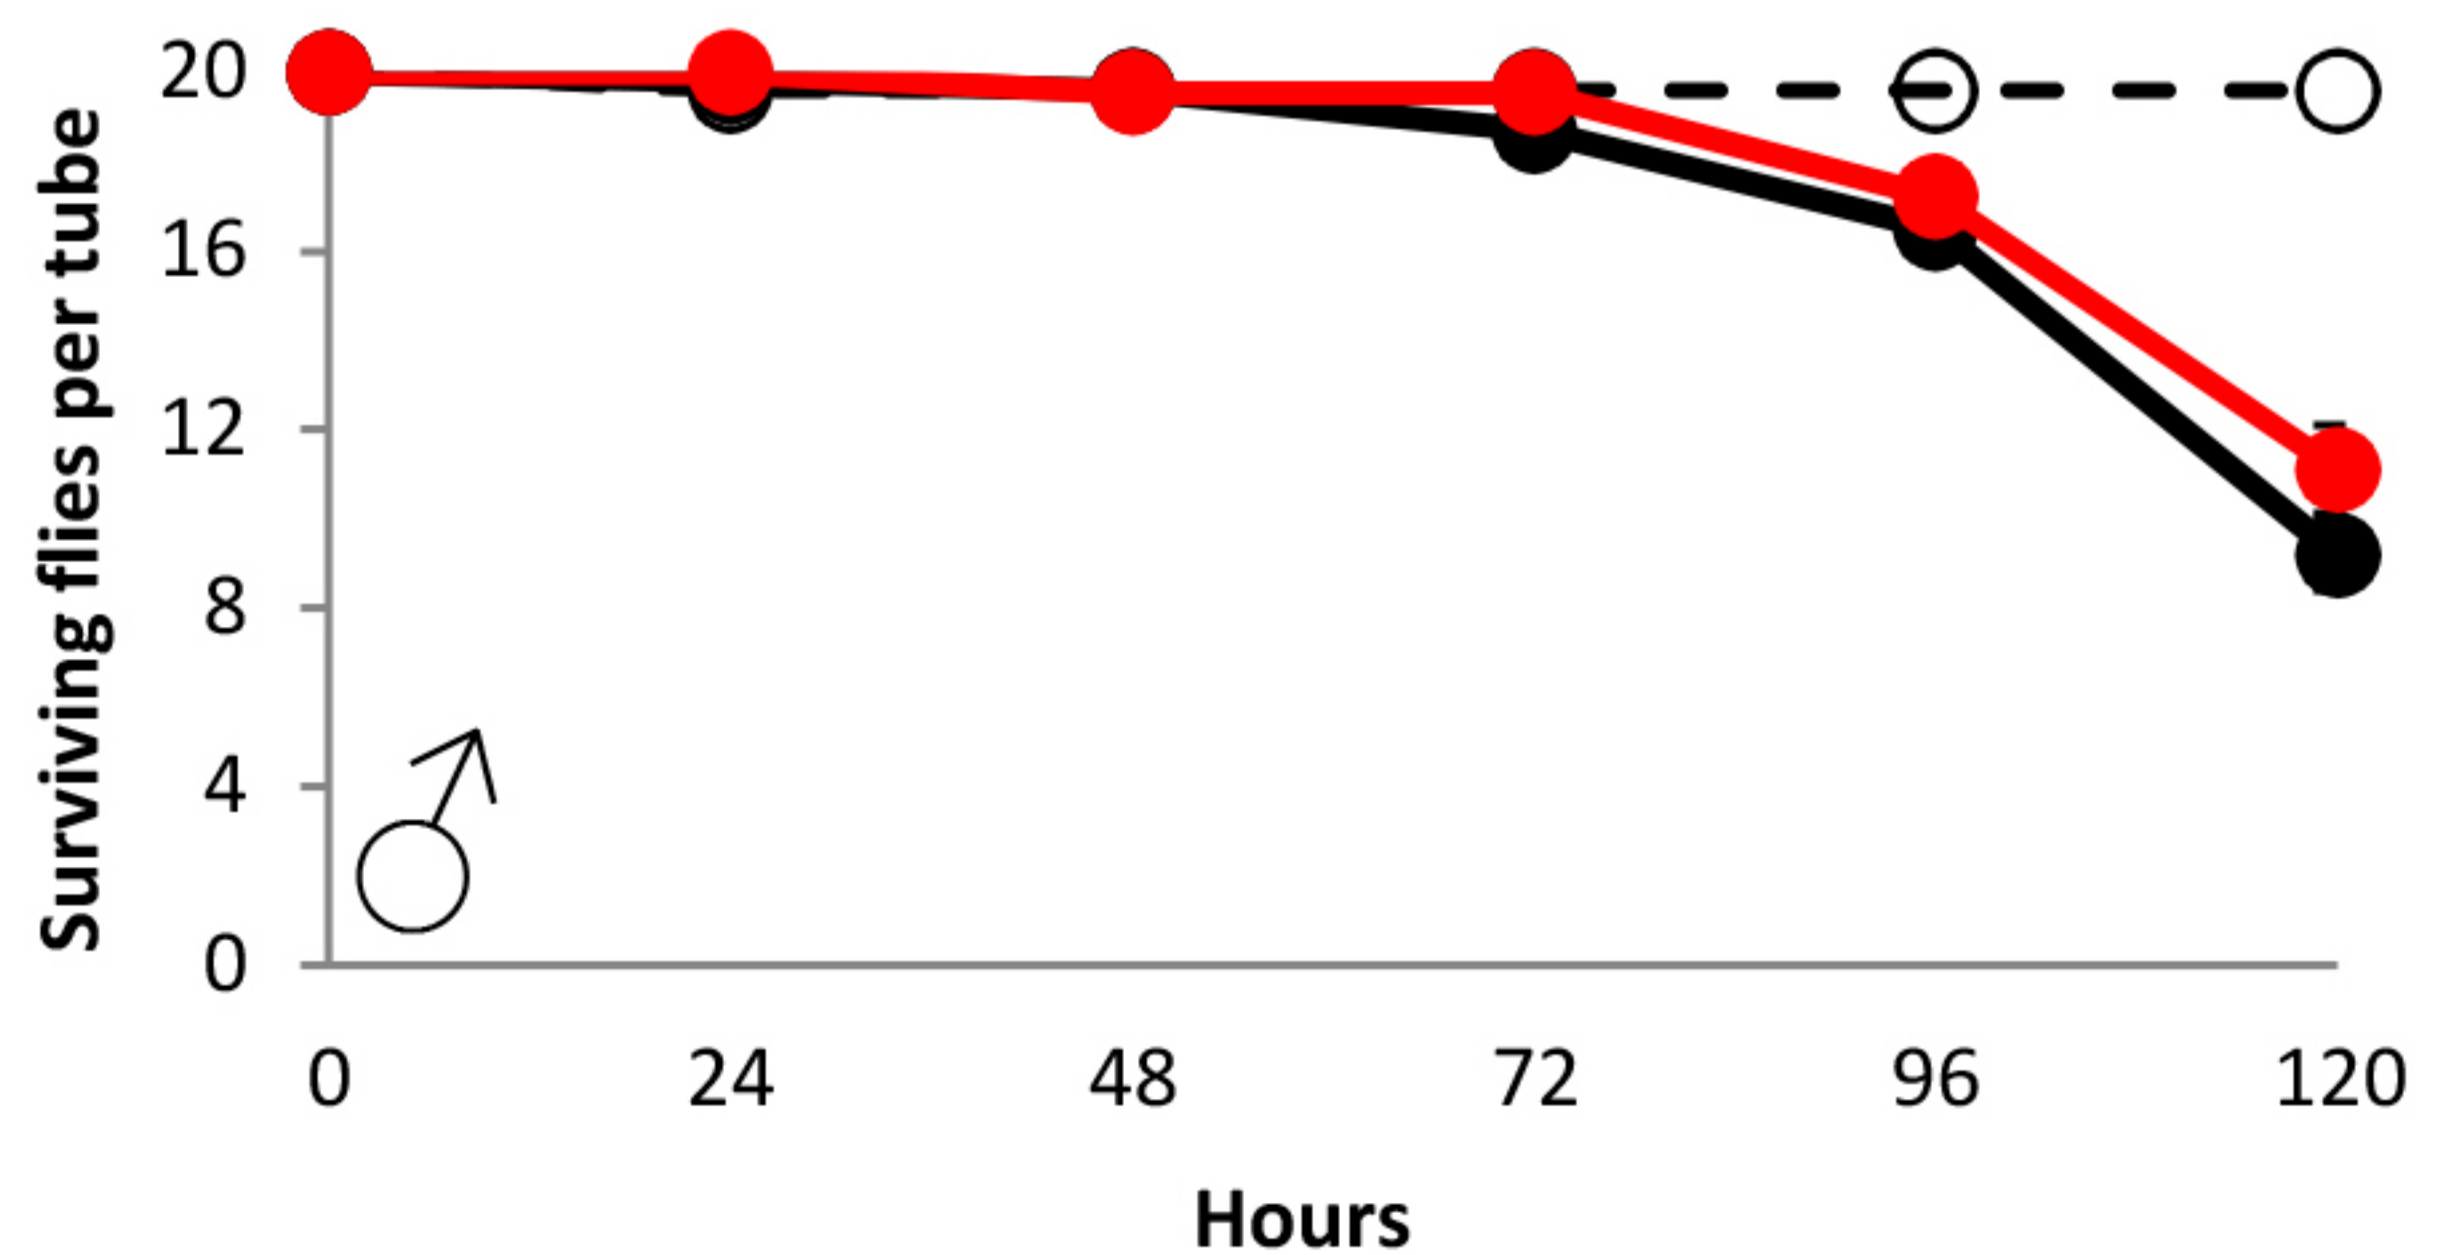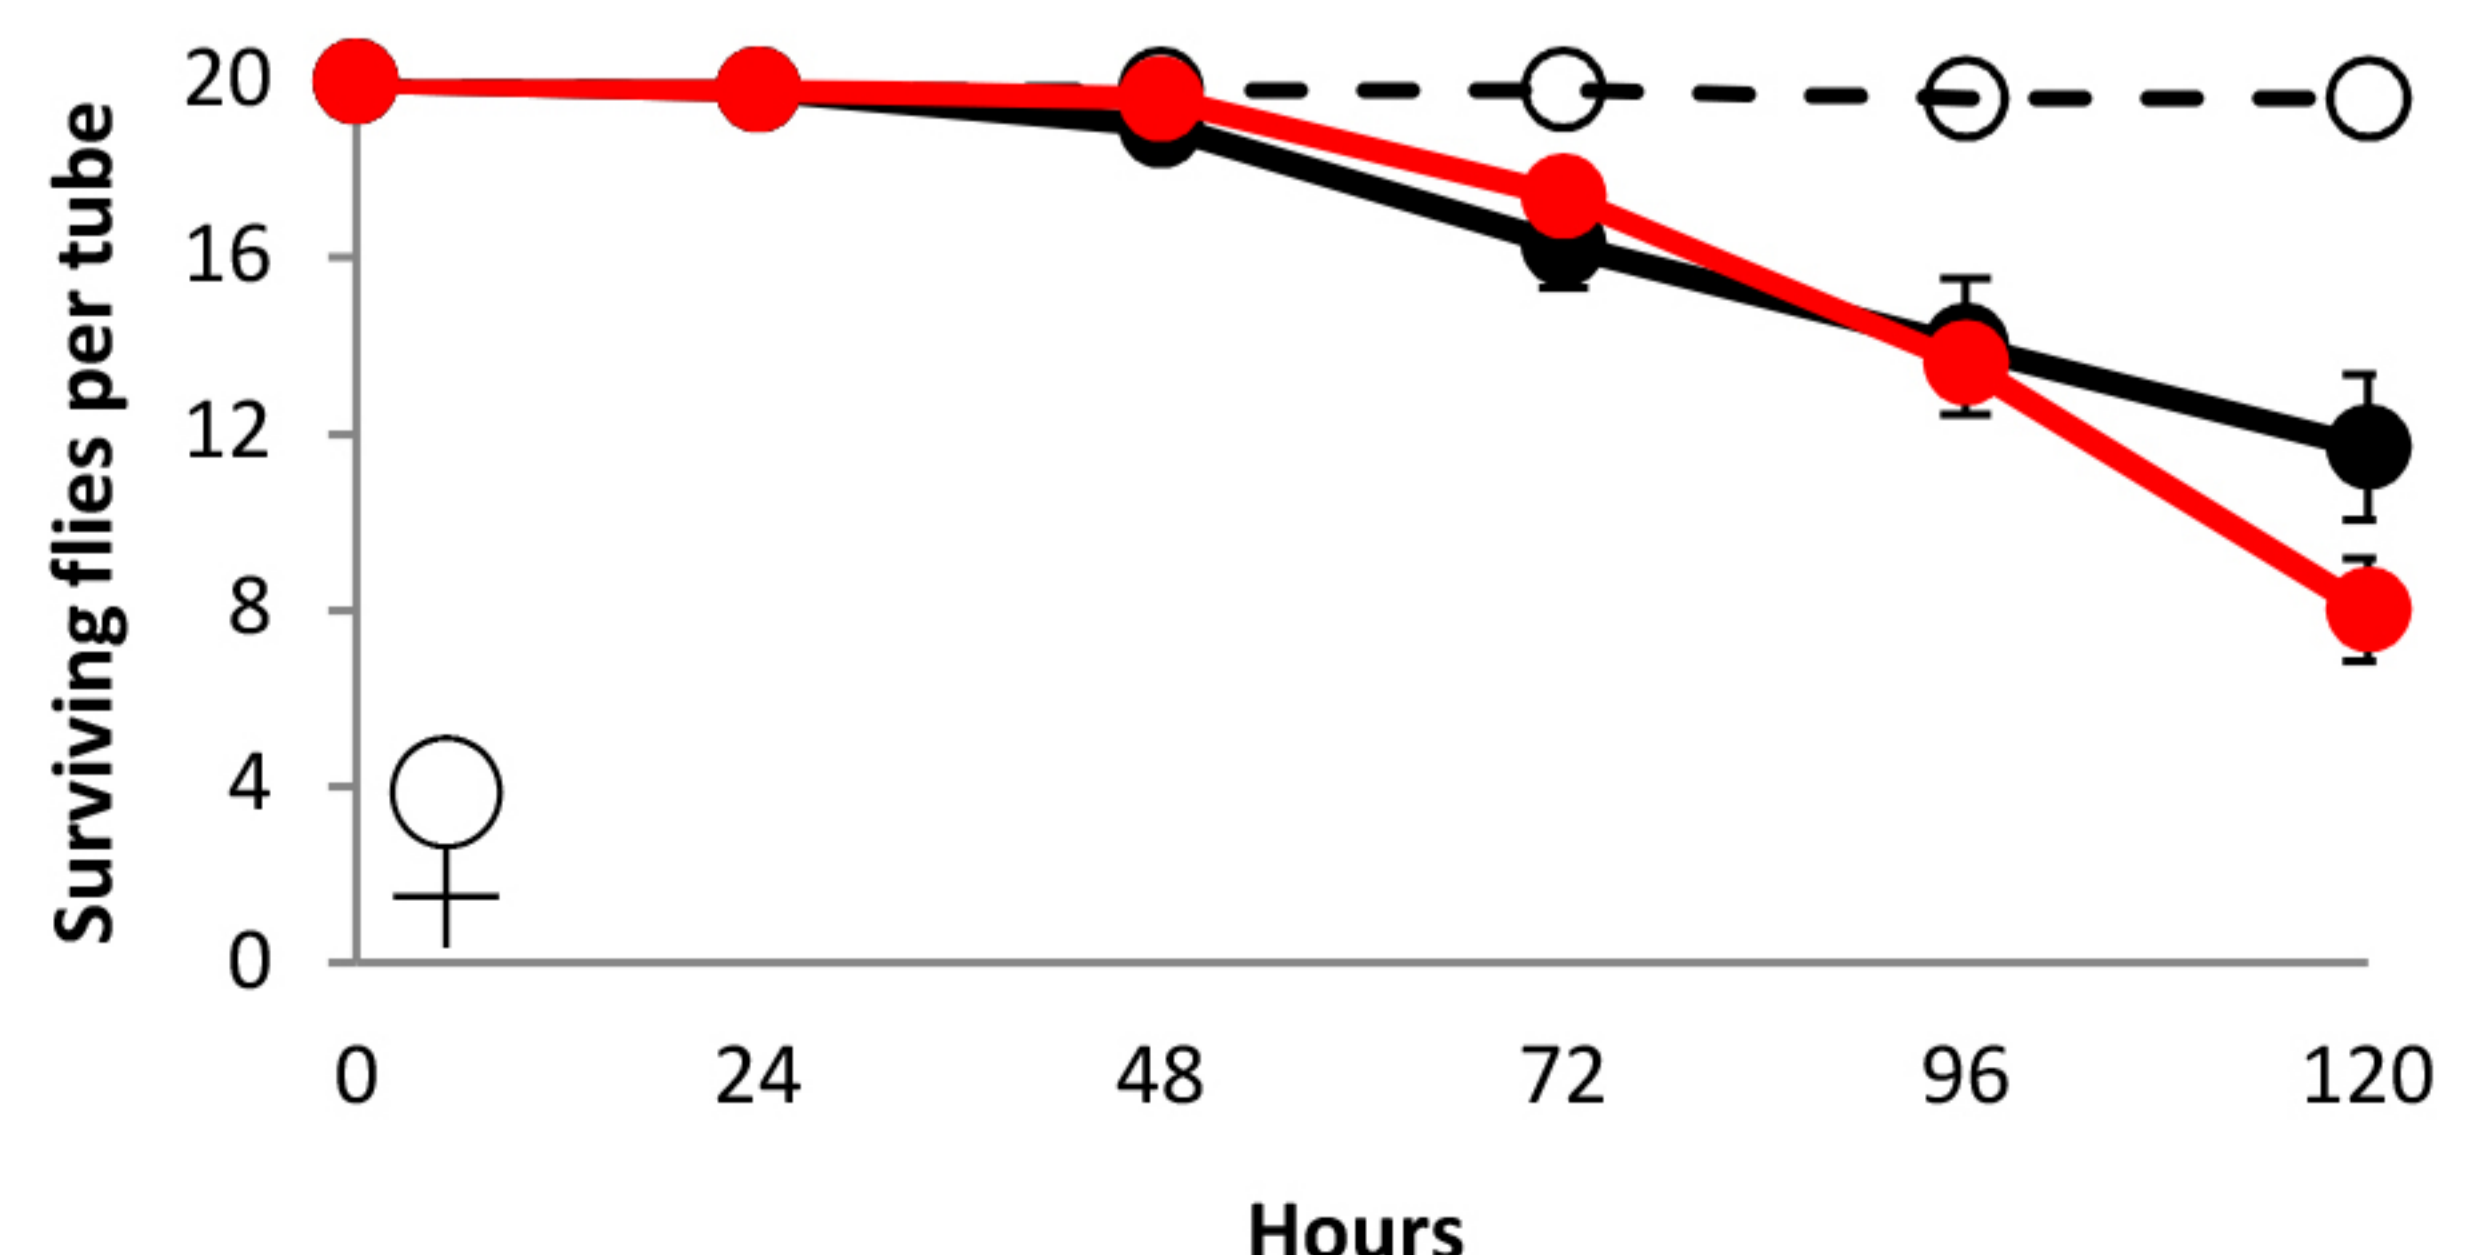

—●— B45 *FBti0019170* (+) Zinc stress  
 - -○- B45 *FBti0019170* (+) Nonstress

—●— B47 *FBti0019170* (-) Zinc stress  
 - -○- B47 *FBti0019170* (-) Nonstress

a)

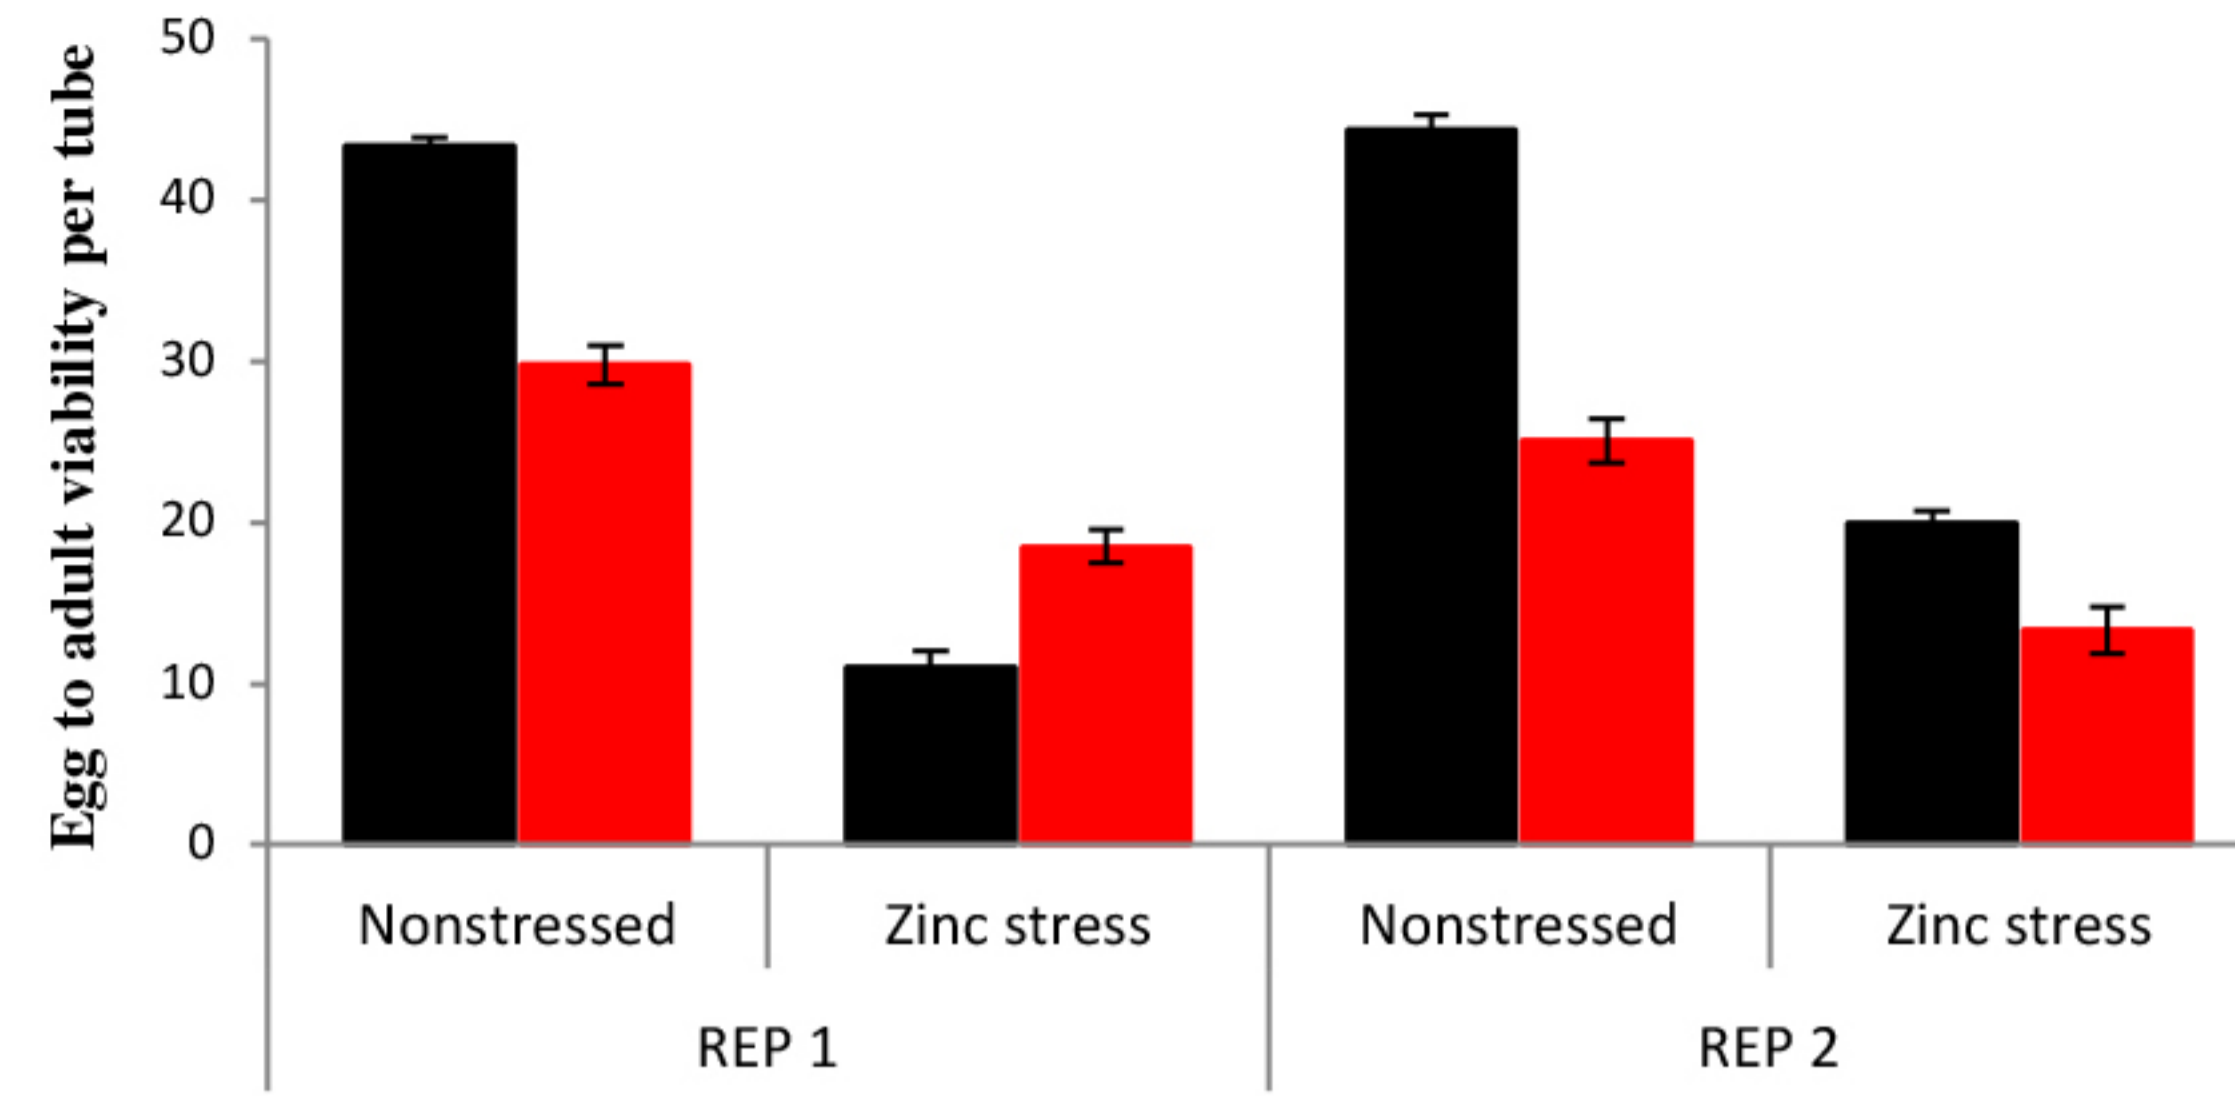

b)

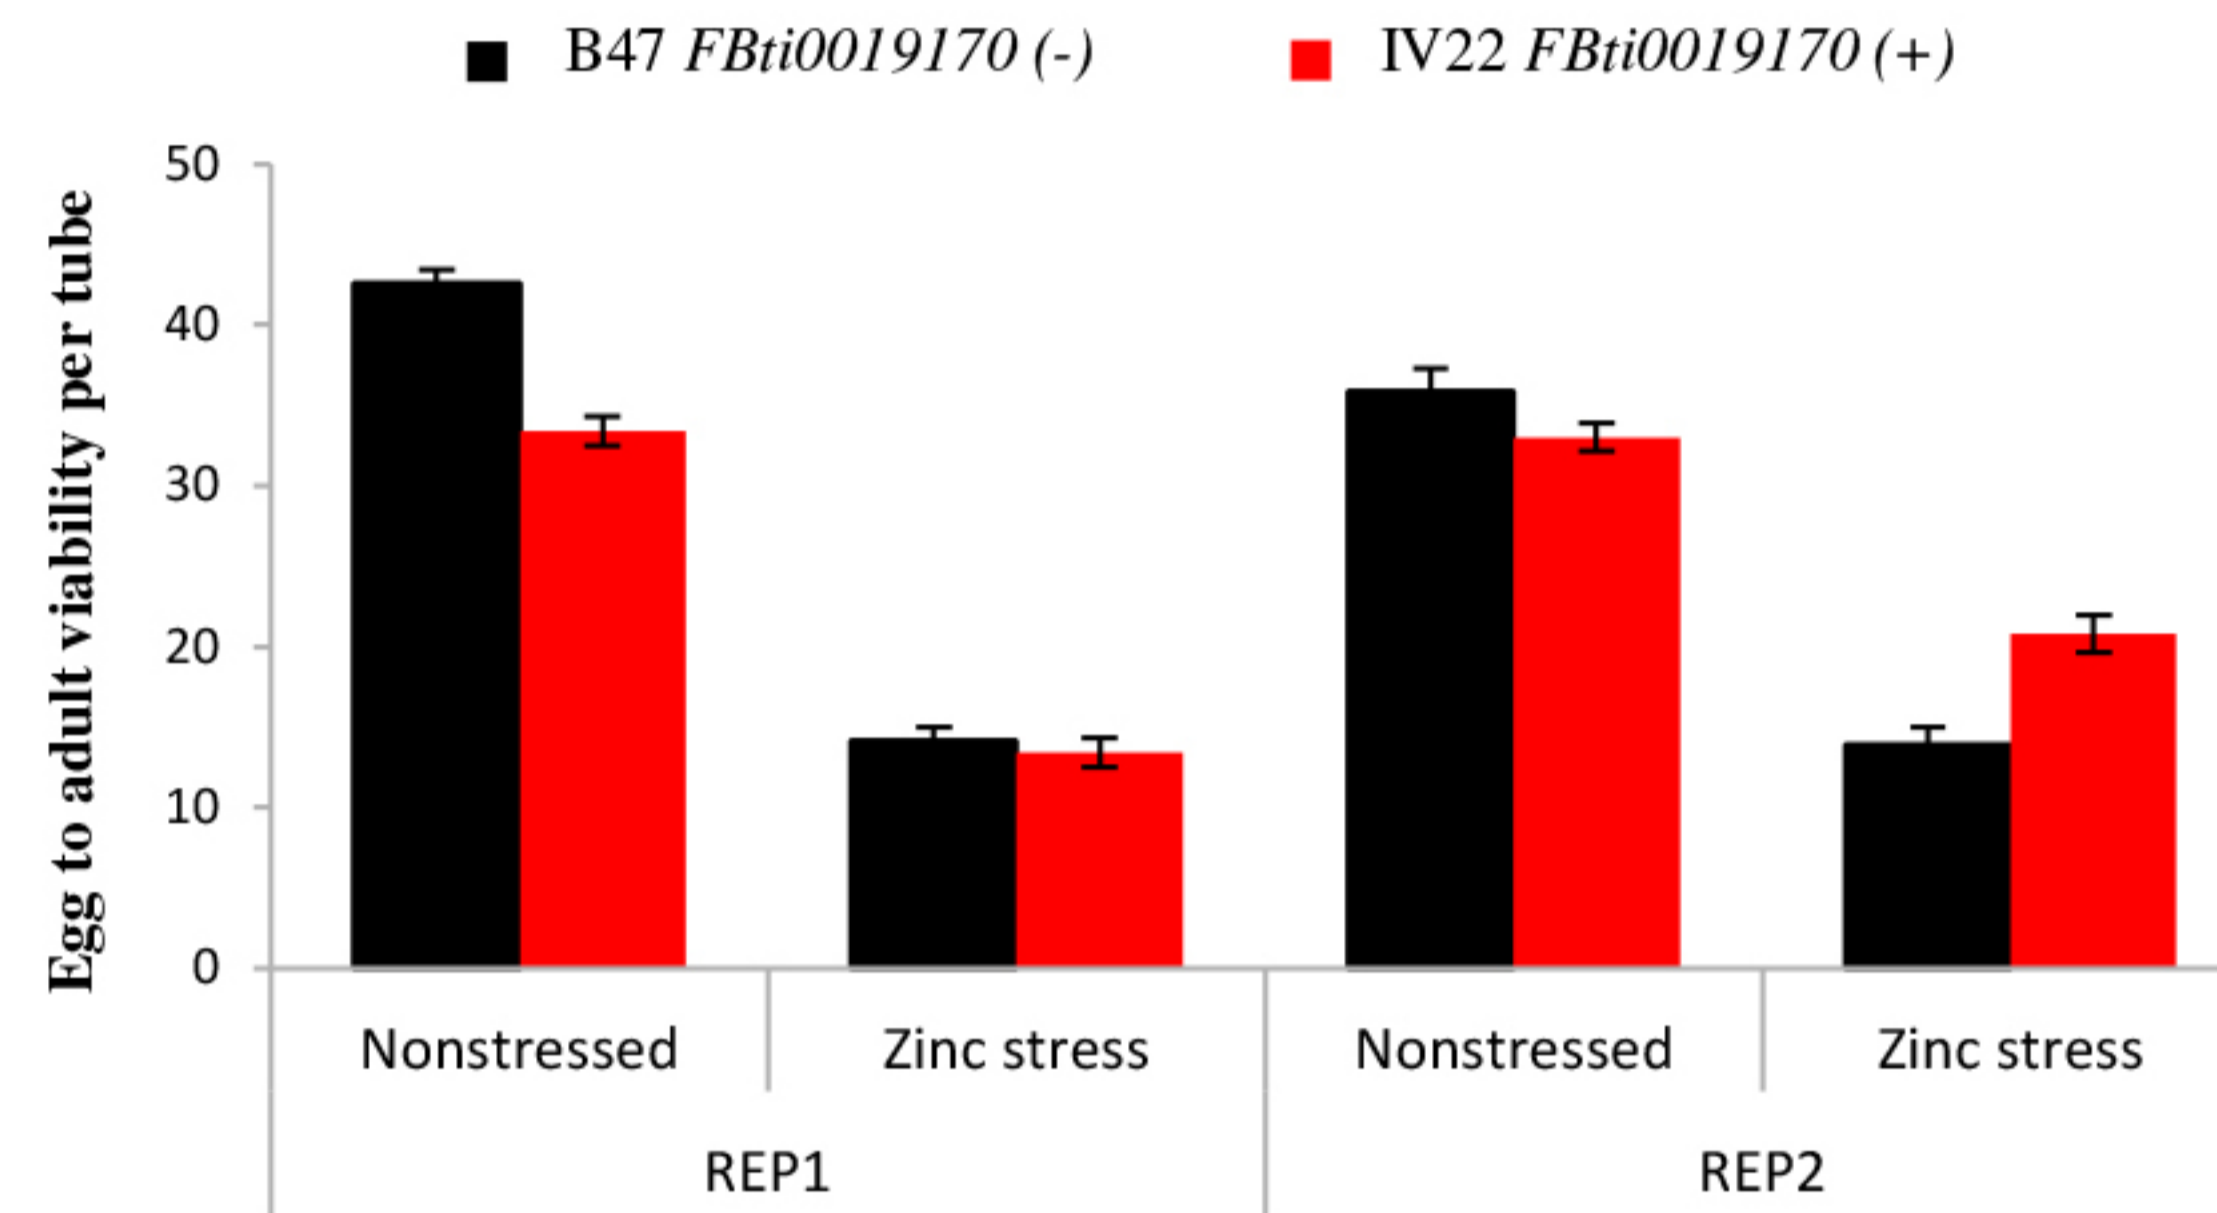

c)

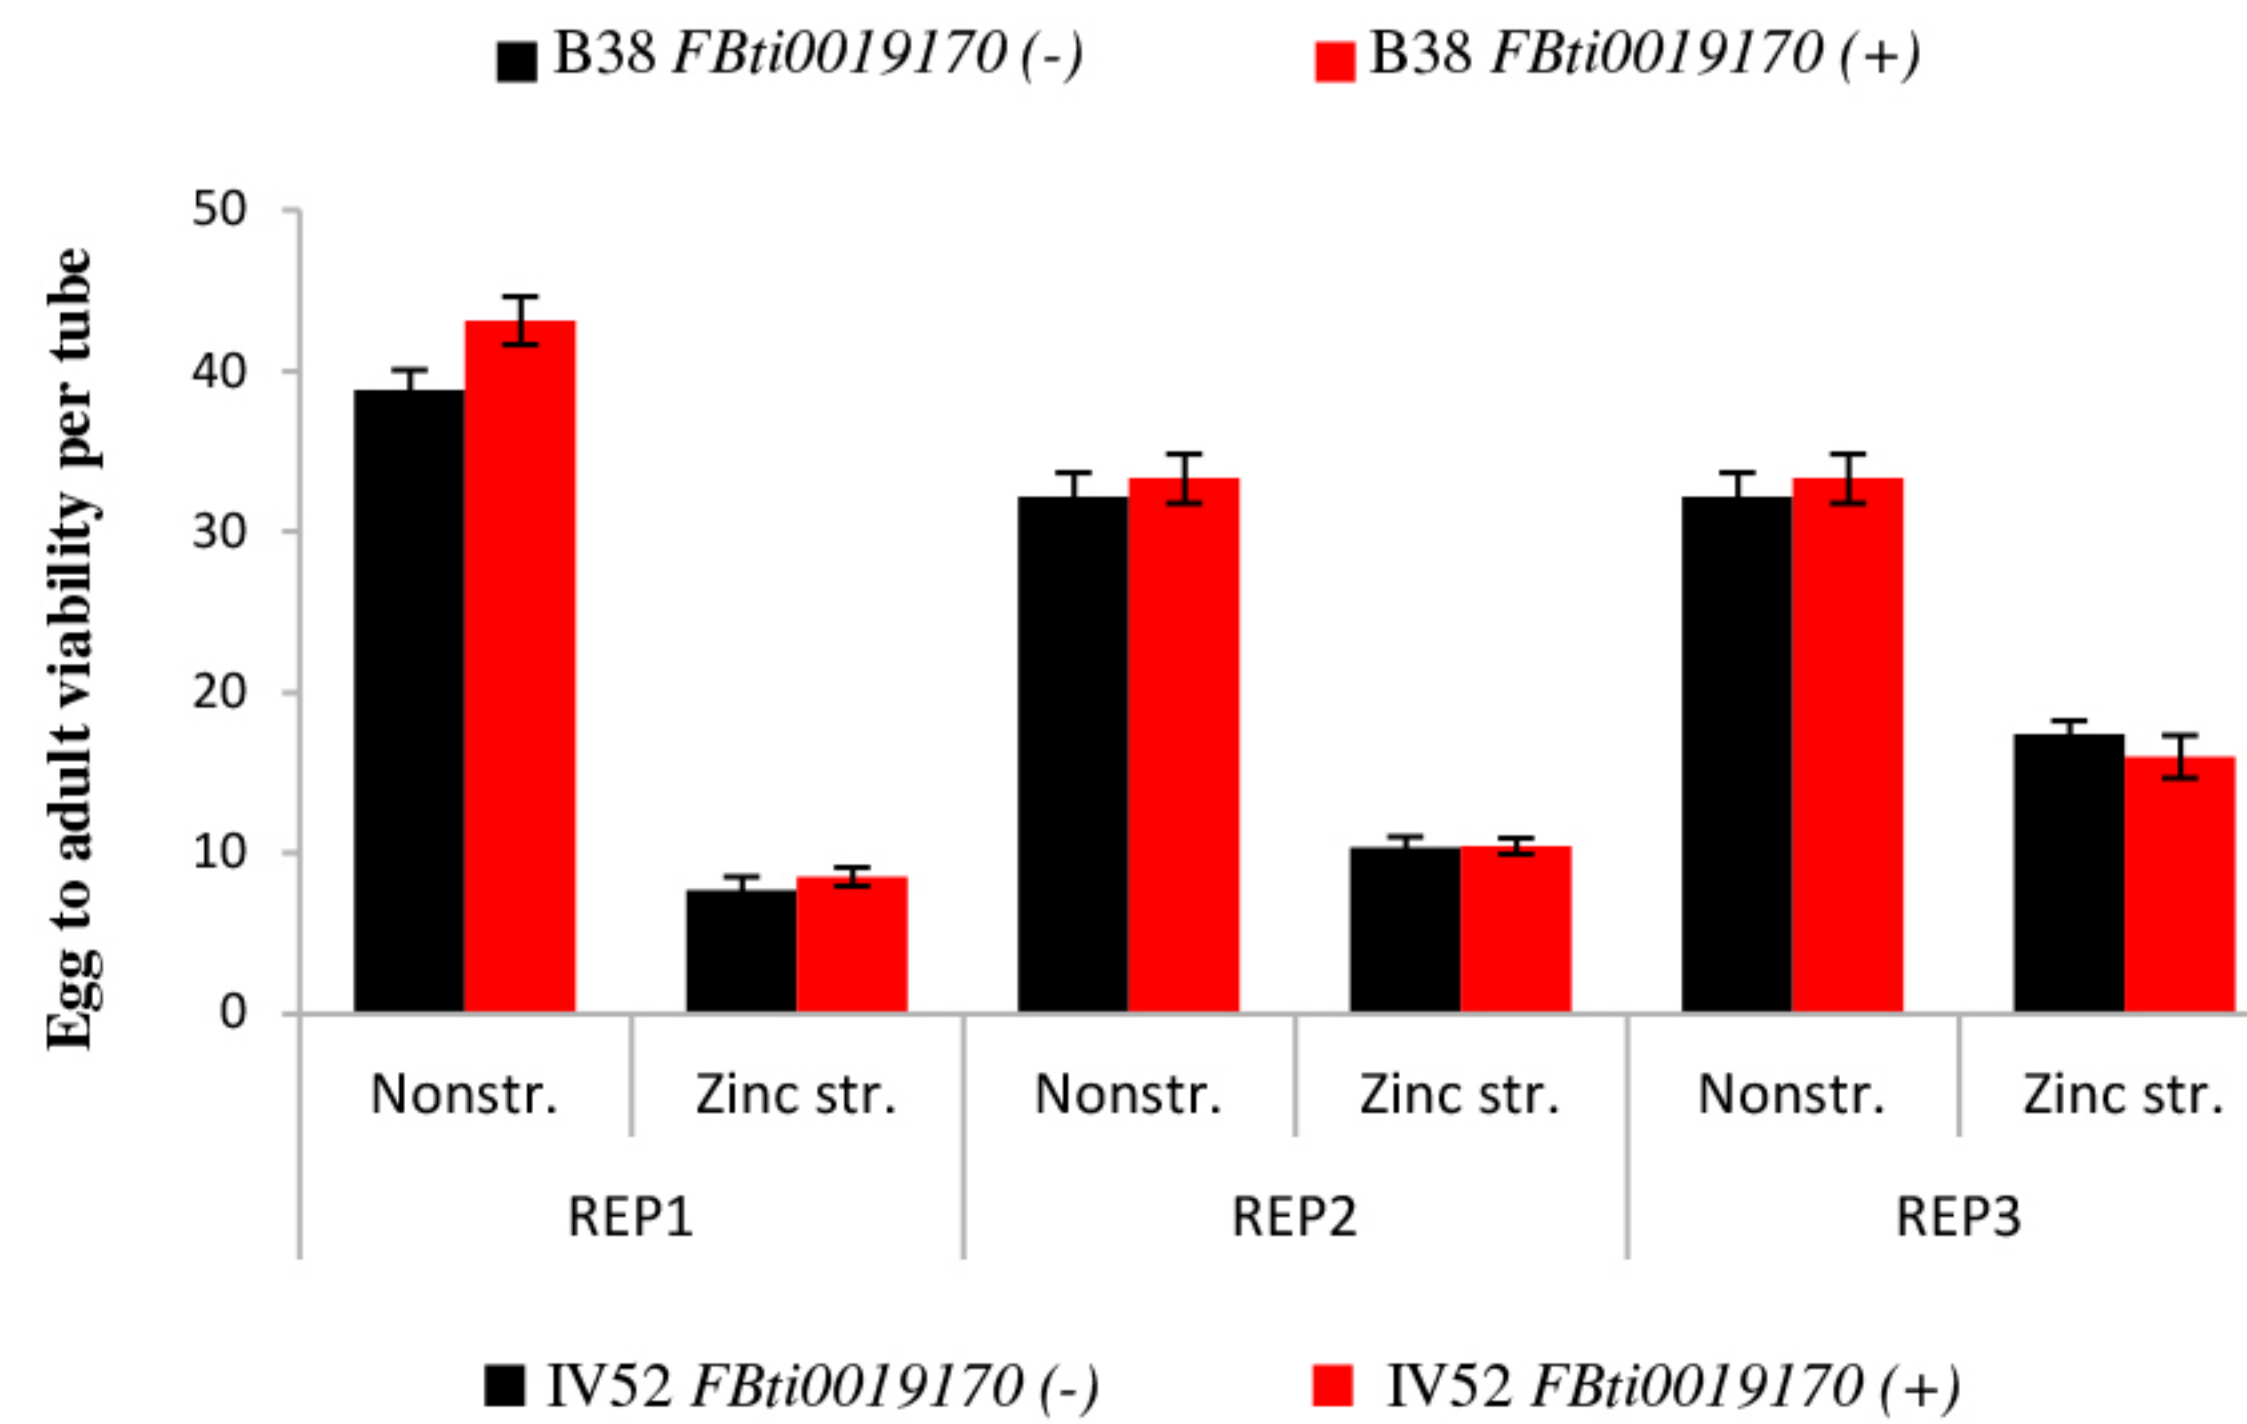

Figure 8

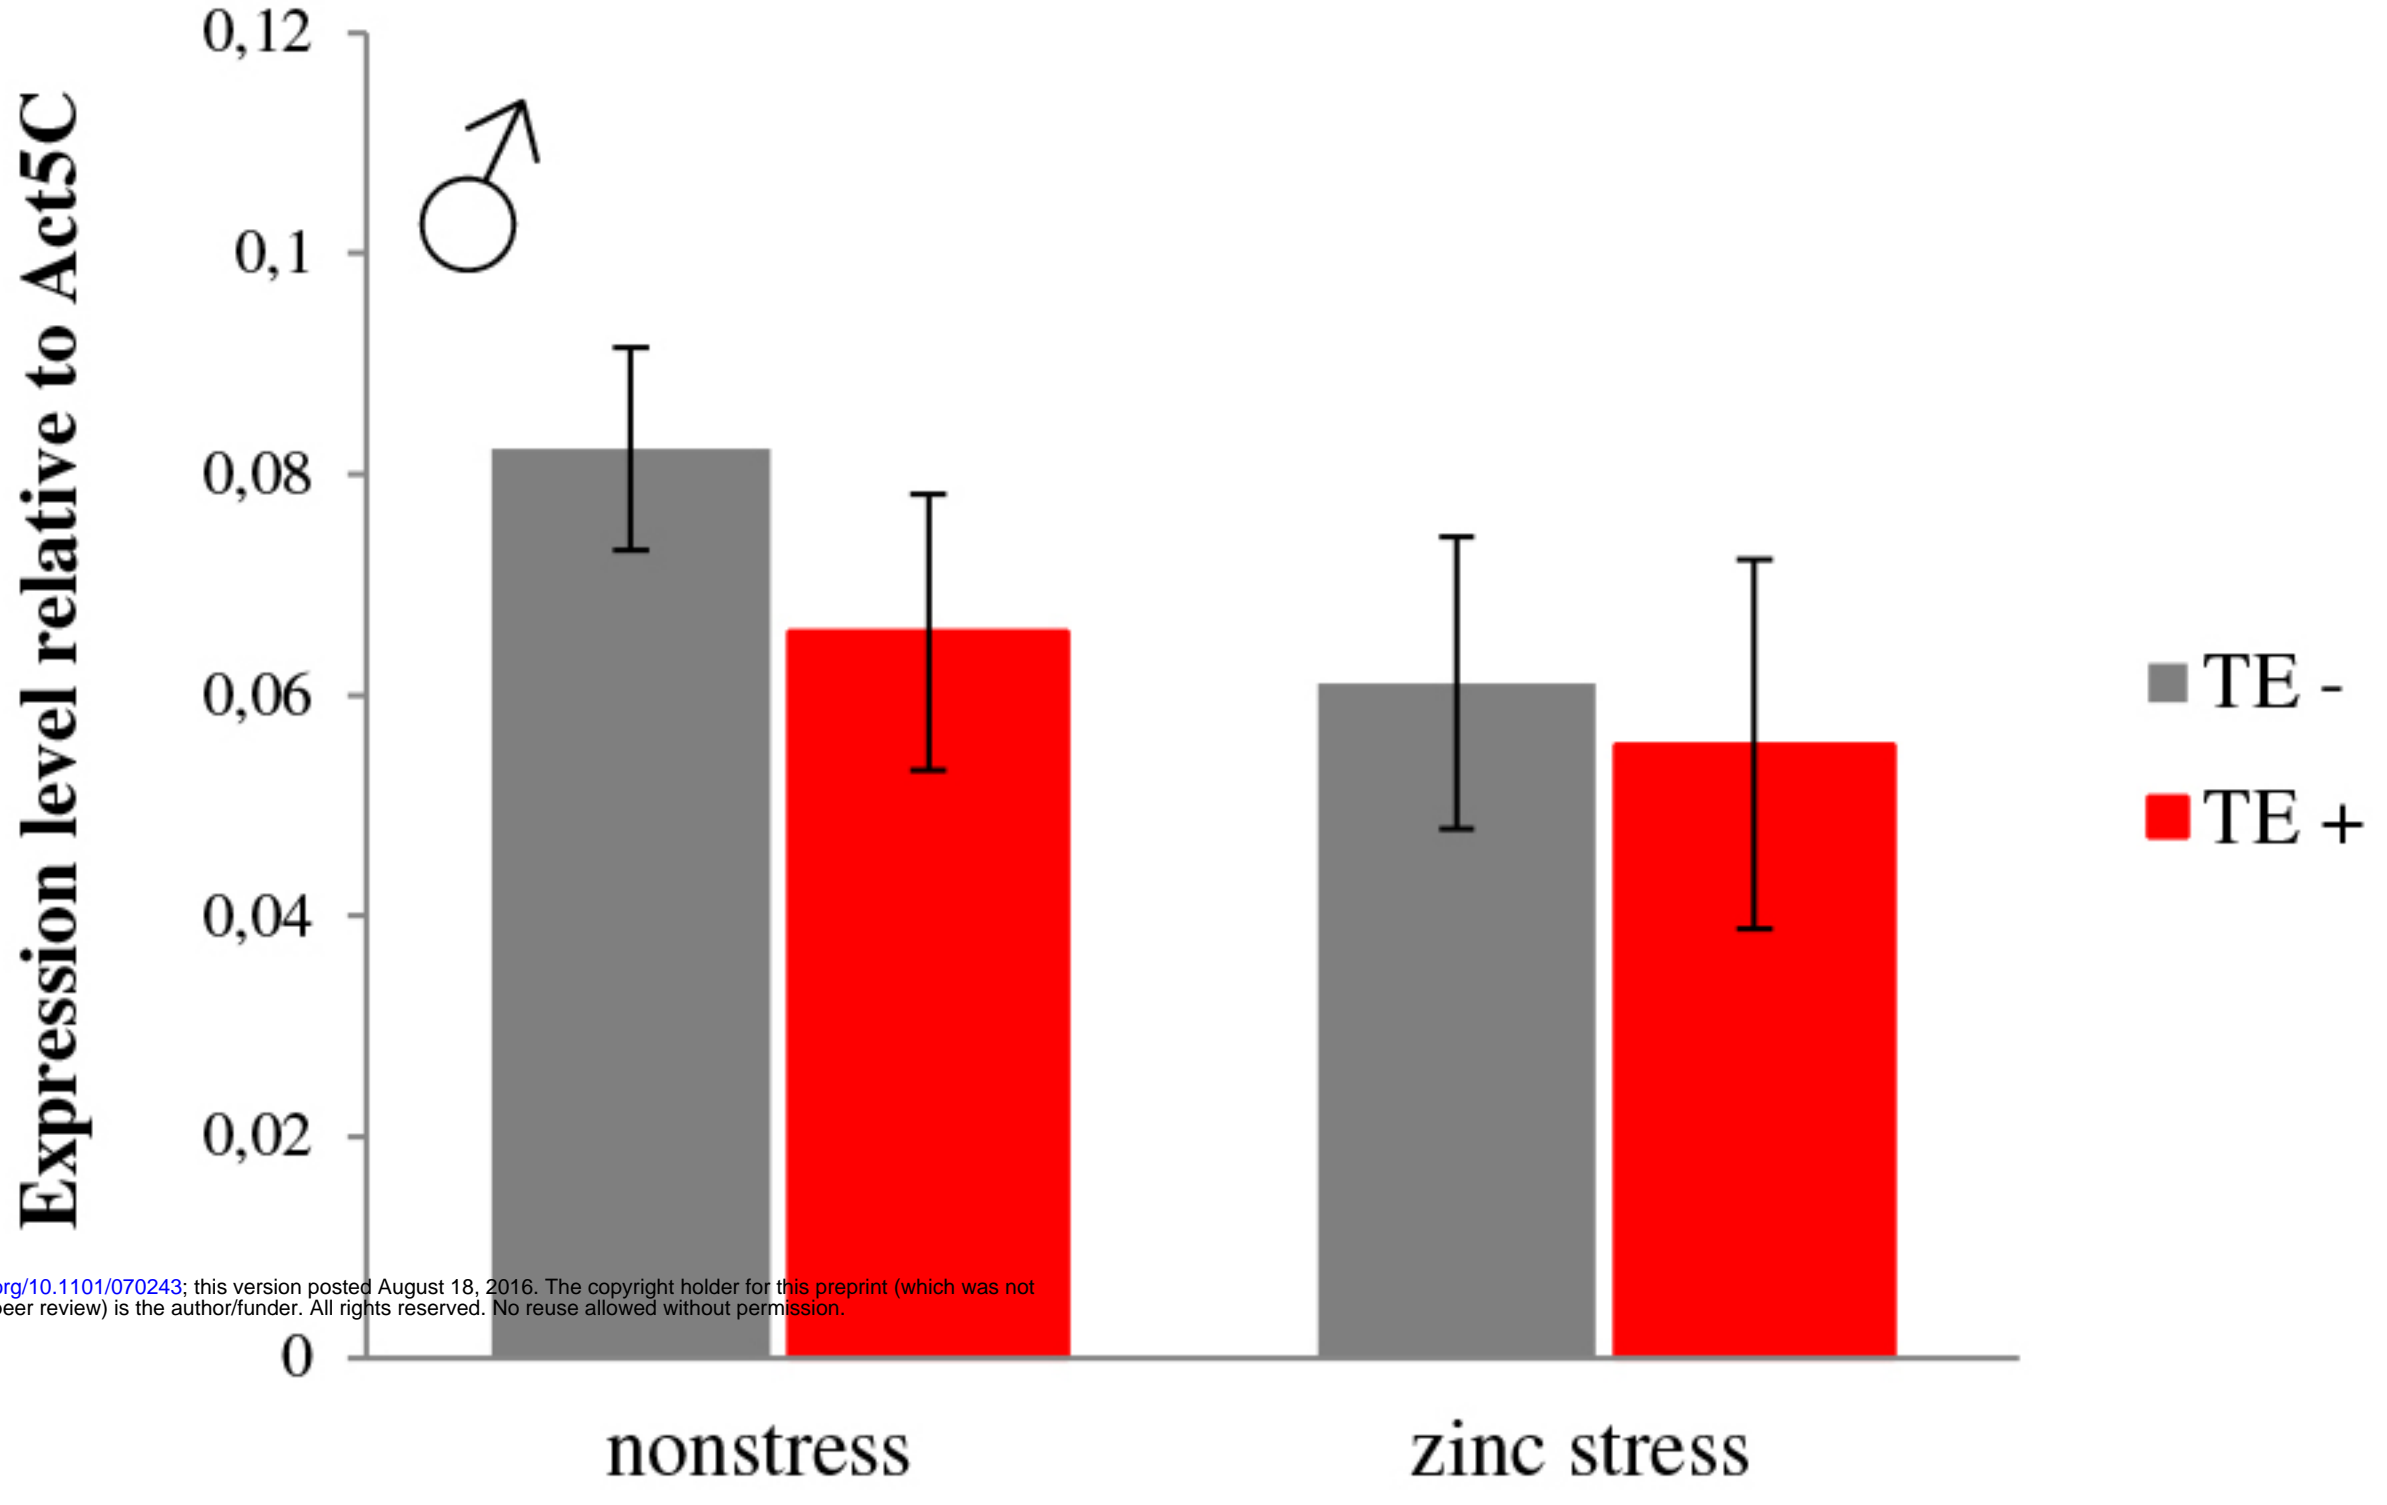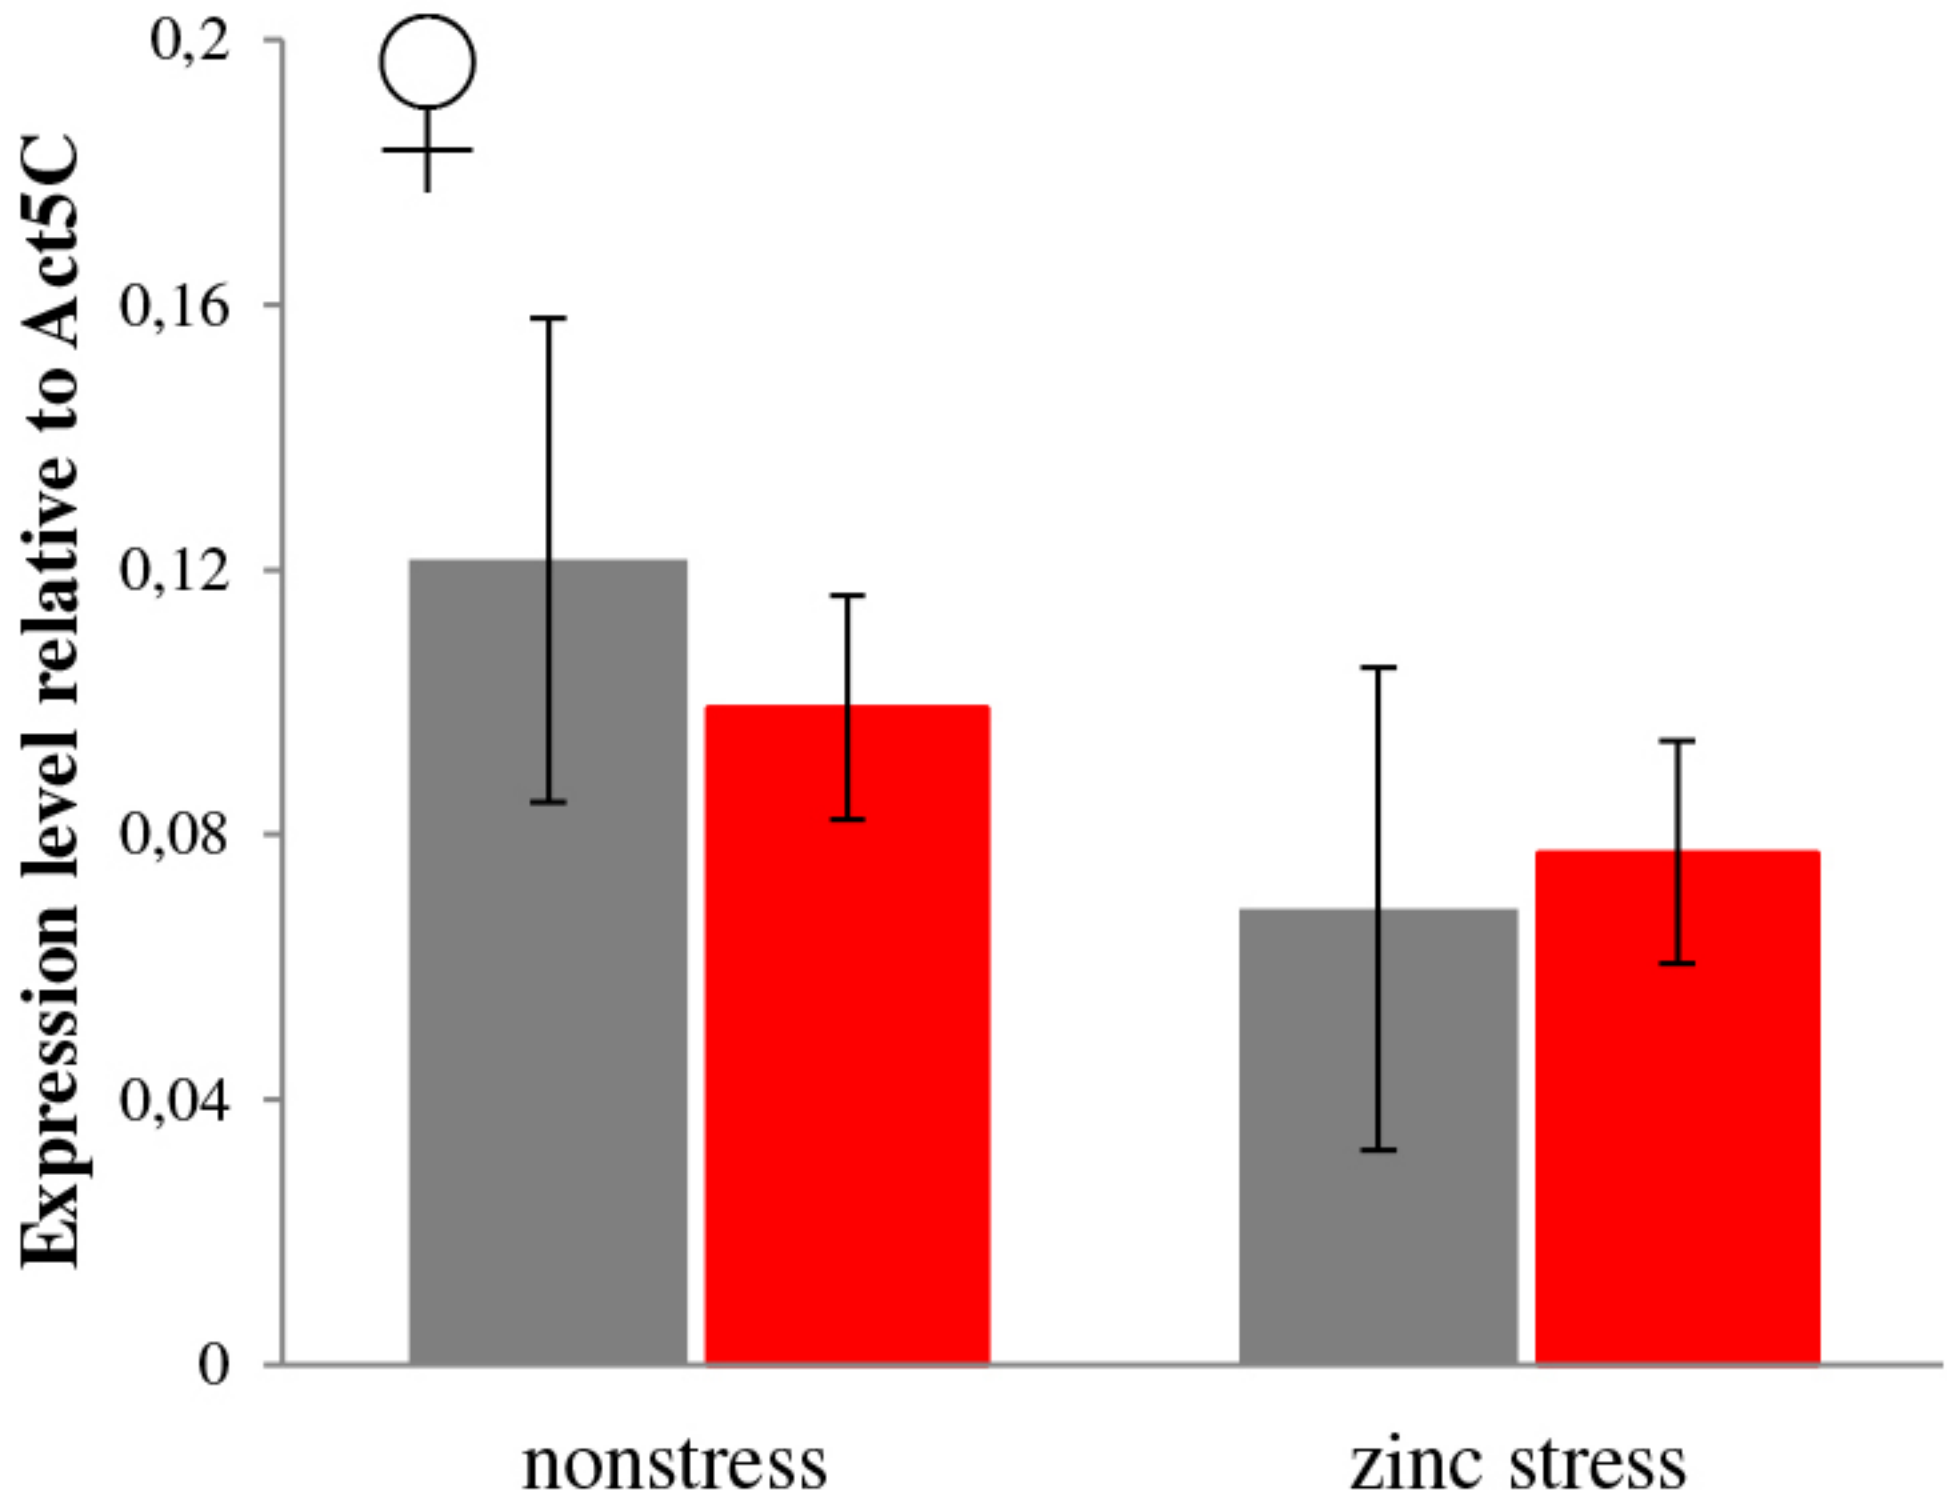

bioRxiv preprint doi: <https://doi.org/10.1101/070243>; this version posted August 18, 2016. The copyright holder for this preprint (which was not certified by peer review) is the author/funder. All rights reserved. No reuse allowed without permission.
